# Supplementary material for: An adipokine feedback regulating diurnal food intake rhythms in mice
Source: eLife. 2020 Jul 9;9:e55388. doi: 10.7554/eLife.55388 (PMC7375813; doi:10.7554/eLife.55388)
Supplement: Figure 1—source data 1. [file elife-55388-fig1-data1.xlsx]

## Sheet: Sheet1
A
ZT	Adipoq mRNA
0	0.966	0.893	1.034	0.859	1.133
6	0.685	0.731	0.799	0.651	0.748
12	1.32	1.407	1.083	1.841	1.215
18	1.032	0.869	0.999	0.748	0.987
24	0.966	0.893	1.034	0.859	1.133
B
ZT	Plasma ADIPOQ
0	19.5463	22.4597	21.9671
6	18.8918	18.4208	20.4657
12	22.9191	24.9609	24.9408
18	22.3646	23.6945	27.7776
24	19.5463	22.4597	21.9671
C
ZT	Adipor1 mRNA					Adipor2 mRNA
0	1.113	1.833	0.93	1.489	1.24	0.733	0.581	0.885	0.724	0.76
6	0.86	0.829	0.909	0.93	0.819	0.779	0.964	0.808	0.803	1.013
12	1.046	1.199	0.848	0.93	1.116	1.7	1.442	1.308	1.086	1.303
18	0.834	0.796	0.801	0.744	0.732	0.97	1.13	1.13	0.869	1.013
24	1.113	1.833	0.93	1.489	1.24	0.733	0.581	0.885	0.724	0.76
D
ZT	Npy mRNA					Agrp mRNA
0	0.788	1.015	1.016	1.029	0.701	0.77	1.229	1.138	1.035	0.994
6	0.716	0.792	0.899	0.842	0.757	0.634	0.713	1.064	0.769	0.861
12	1.513	1.902	1.241	1.309	1.627	1.563	1.087	1.197	1.261	1.353
18	0.815	0.834	0.972	1.029	0.655	0.676	0.808	1	0.779	0.902
24	0.788	1.015	1.016	1.029	0.701	0.77	1.229	1.138	1.035	0.994
E
ZT	Adipoq L-RF			Adipoq D-RF
0	1.374	1.131	1.616	0.673	1.024	0.795
6	1.244	1.778	1.535	1.01	0.741	0.943
12	1.358	1.131	1.002	1.077	0.97	0.929
18	1.212	1.293	1.6	1.347	1.414	1.077
24	1.374	1.131	1.616	0.673	1.024	0.795
F
ZT	Pomc					Cart
0	1.04	1.14	1.09	0.93	1.05	0.96	1.14	1.16	1.09	1.02
6	0.79	0.81	0.78	0.94	0.96	0.8	0.77	0.81	0.78	0.94
12	1.21	0.87	1.14	0.97	1.03	1.03	1.07	1.09	0.83	0.87
18	0.93	1.04	1.09	1.19	1.01	1.03	1.1	1.36	0.97	1.2
24	1.04	1.14	1.09	0.93	1.05	0.96	1.14	1.16	1.09	1.02
G
ZT	ADIPOQ Day RF			ADIPOQ Night RF
0	23.7336	20.9605	22.4597	18.4963	22.2748	21.3692
6	24.4426	27.6933	24.741	20.5689	18.4058	18.86
12	17.9897	14.9808	15.9389	18.7689	12.4318	21.2745
18	18.6294	19.0852	21.6852	25.8641	30.1041	24.2199
24	23.7336	20.9605	22.4597	18.4963	22.2748	21.3692
H
ZT	Adipor1 L-RF			Adipor2 L-RF
0	0.965	1.158	1.35	0.81	0.663	0.884
6	0.945	0.849	1.051	1.142	1.326	1.488
12	0.974	0.82	1.051	1.024	0.862	1.105
18	0.859	1.061	0.916	0.891	1.053	0.751
24	0.965	1.158	1.35	0.81	0.663	0.884
I
ZT	Npy			Agrp
0	0.711	0.788	0.893	0.653	0.792	0.887
6	1.504	1.683	1.234	1.611	1.12	1.394
12	0.81	0.697	0.966	0.697	0.832	0.929
18	0.784	0.92	1.01	0.794	1.266	1.024
24	0.711	0.788	0.893	0.653	0.792	0.887
J
ZT	Pomc			Cart
0	0.85	0.92	0.89	0.83	1.05	0.99
6	1.12	0.83	0.84	0.38	0.72	0.56
12	1.45	1.26	1.3	1.24	1.42	1.45
18	0.9	0.64	0.99	1.14	1.06	1.16
24	0.85	0.92	0.89	0.83	1.05	0.99
K
ZT	NC					HFD
2	0.691	0.922	1.059	1.327	0.791	0.323	0.908	1.121	0.936
14	1.839	1.739	1.884	1.942	1.327	1.331	0.917	1.736	1.409
L
ZT	NC				HFD
2	16.79	18.889	26.235	23.086	12.593	16.79	15.741	16.265
14	34.63	28.037	26.235	31.481	15.741	26.654	24.136	19.938
M
ZT	AdipoR1-NC				AdipoR1-HFD				AdipoR2-NC				AdipoR2-HFD
2	0.979	1.359	0.822	0.84	1.464	1.055	1.273	1.14	0.787	0.87	1.135	1.208	1.108	1.016	1.336	1.611
14	0.812	0.747	0.516	0.969	1.359	1.378	1.15	1.521	1.867	1.707	1.412	2.125	1.741	2.032	1.831	1.518
N
ZT	Npy-NC				Npy-HFD				Agrp-NC				Agrp-HFD
2	0.81	1.237	0.819	1.133	0.509	0.542	0.635	0.852	0.828	0.818	1.237	1.118	0.65	0.936	1.07	1.156
14	2.079	1.892	1.442	1.545	1.124	1.268	0.937	0.927	1.156	1.701	1.682	1.386	1.261	0.994	0.831	1.263
O
	Pomc-NC				Pomc-HFD				Cart-NC				Cart-HFD
2	0.93	1.2	1.02	0.86	1.26	1.52	1.53	1.38	1.03	0.84	1.11	1.02	1.48	1.46	1.13	1.46
14	1.26	1.2	0.98	1.18	1.15	1.47	1.35	1.27	1.21	1.12	0.94	0.95	1.22	1.33	1.25	1.38
