# Supplementary material for: An adipokine feedback regulating diurnal food intake rhythms in mice
Source: eLife. 2020 Jul 9;9:e55388. doi: 10.7554/eLife.55388 (PMC7375813; doi:10.7554/eLife.55388)
Supplement: Figure 2—source data 1. [file elife-55388-fig2-data1.xlsx]

## Sheet: Sheet1
A
ZT	WT						MT
0	5.2286	1.03858	2.41124	0.885502	0.114688	1.65814	2.6495	3.78179	0.133868	0.258771	0.168019	0
0.5	1.51491	0.253071	0.688114	0.279045	0	0	0.50506	0.439889	0	0	0.00362054	0
1	0.00602292	0	0.379113	0.357849	0	0.0272056	0	0	0	0	0.0119239	0.000527385
1.5	0	0.473239	0.0688885	0.0871752	0.0105288	0.107896	0	0	0.201063	0	0	0.000527385
2	0	0.193186	0.00815704	0	0.00902987	0.0351463	0.0430102	0	0.129189	0	0	0
2.5	0.00120097	0.0051929	0.00447598	0	0.00149896	0.276614	0.244553	0.189739	0	0	0.0556414	0
3	0.0117298	0.00207716	0.158176	0	0.00812688	0.0125346	0.391629	0.349283	0	0	0.289795	0
3.5	0.00601389	0.0051929	0.291868	0.0060873	0.0285976	0.00366776	0.237966	0.998628	0.0418135	0.0110004	0.0372135	0
4	0.106552	0.207031	0.074196	0	0.0719319	0.167488	0.408977	0.0144377	0.36454	0.00141632	0.0036097	0.000787141
4.5	0.00473391	0.0864618	0.314607	0.00385453	0.0186207	0.0209819	0.183021	0.549541	0.0110981	0	0.0499992	0
5	0.0105379	0.00311574	0.0970284	0.0102787	0.00120097	0	0	0.321058	0	0.027336	0.0466117	0.00105477
5.5	0.0309996	0.00449705	0	0.0106556	0	0.0446275	0.165464	0	0.000944222	0.00710289	0.114546	0
6	0.16224	0.11009	0.0505443	0.00151897	0.0084339	0.0886407	0.0856873	0.485861	0.0075115	0.0195196	0	0.00971332
6.5	0.0936127	0.0889751	0.448417	0	0.00150799	0	0	0.36768	0	0	0.0267421	0
7	0.0186648	0.000342731	0	0.00419144	0.0177618	0	0	0.628328	0.00422786	0	0.00577769	0.00314856
7.5	0.0189627	0.0456975	0.670589	0.00228416	0.0198657	0.0889433	0.00242472	0	0	0	0.00541997	0
8	0.112277	0.000695848	0.666517	0.0536779	0.000297986	0.0935279	0.0346849	0	0.000465065	0.0734782	0	0
8.5	0.133046	0.039466	0.00774124	0.00342625	0	0.0314877	0.0059005	0.786552	0	0	0	0
9	0.0316046	0.0141974	0.0782685	0	0	0	0	1.27505	0.0497901	0	0.0036097	0.00891831
9.5	0	0	1.66443	0	0	0	0	2.16009	0	0	0	0
10	0.00120097	0	2.67415	0	0	0.00764729	0	1.61975	0.000465065	0	0	0
10.5	0.0132378	0.0051929	2.19886	0.000376887	0	0	0	1.25469	0	0	0	0
11	0.273912	0.0051929	1.69459	0	0.00932786	0.00641859	0.0173477	0.414933	0	0	0.000715436	0
11.5	0.980635	0.530018	1.23394	0.0384425	0.176687	0.284563	0.442288	3.11735	0.286564	0.221862	0.246782	0.279435
12	6.26975	8.2477	3.41935	4.488	4.52547	7.80989	8.58886	9.63241	9.90868	7.71662	6.58275	7.40176
12.5	7.27506	7.42549	5.12372	5.7127	5.55548	8.22619	8.23328	9.29557	10.4292	8.28282	7.00007	8.36049
13	7.82167	7.04227	5.88316	5.53452	5.96723	7.58188	7.52115	8.66196	9.53289	8.53911	7.09076	7.95275
13.5	7.14112	6.71305	6.0976	5.70852	6.2875	7.38229	7.42957	7.2366	8.48202	8.06451	6.94371	8.01414
14	7.49901	6.9571	5.62189	5.89809	5.6545	7.2093	7.16871	7.01405	8.1607	6.97902	6.72077	7.39755
14.5	6.64628	6.92561	6.05602	5.59696	6.20833	6.7603	6.8298	5.83088	7.96295	6.74686	6.58671	6.89248
15	6.90846	6.84251	5.36178	5.41081	5.94106	6.67808	5.52273	5.93136	7.29447	6.58677	6.54371	7.14697
15.5	6.53401	6.53233	5.68954	5.05752	5.6253	5.97418	5.60843	4.22827	6.49635	5.90631	5.76613	6.61565
16	5.24394	6.47035	5.54686	5.42754	5.63977	4.59601	4.80469	2.84355	5.66815	6.30707	6.06023	6.2499
16.5	4.03967	5.6433	5.99448	4.92694	6.05723	2.70376	2.43963	1.54293	2.87304	5.49595	5.66711	6.14757
17	2.06392	5.78073	5.3626	5.56232	5.72372	2.52646	1.90301	0.961854	1.47692	4.43745	5.58511	5.15526
17.5	0.901777	5.65472	5.54035	5.86041	6.30496	1.96532	2.21139	0.477963	0.758196	2.58736	5.00336	4.35421
18	0.00752188	3.16664	5.06177	5.23646	5.2286	0.821267	1.98764	1.68473	1.2322	2.12661	4.64564	3.61167
18.5	0.000902987	1.70084	3.75404	4.61554	4.7765	2.06281	0.81378	1.69457	0.901478	0.714901	3.72316	1.31689
19	0.00451494	0.0290802	2.92651	3.25913	4.02161	3.0256	2.55757	2.70898	1.36091	0.715965	2.78297	0.447875
19.5	0.29618	0	0.34772	4.1153	3.46055	3.48682	2.31442	2.33673	1.84194	0	1.68922	0.548897
20	0.801257	1.1871	0.012633	3.98358	2.24362	1.87483	1.2748	1.48382	1.10112	0	2.31794	1.60393
20.5	0.195343	2.56461	0.50345	4.04374	1.29008	1.07832	2.03413	0.326317	1.06496	0.657407	2.3837	1.51997
21	1.02399	3.32243	1.63018	3.72776	1.85625	2.70804	2.82953	0.857461	1.42338	0.855468	2.10909	2.54298
21.5	3.05632	2.63937	1.55028	1.32557	1.38819	2.5601	2.65505	0.707765	2.06461	2.63528	1.5371	3.08848
22	3.39283	1.45193	1.29306	0.930044	1.17118	3.01827	2.27383	1.21529	1.91147	3.24264	0.998001	1.39587
22.5	4.21605	0.502683	0.411717	0.949071	1.05829	3.39421	3.31968	1.4523	2.48975	4.85774	0.559677	0.364714
23	4.80991	0.0283844	0.375444	0.77737	0.62847	2.47634	2.69634	2.26251	2.5433	3.7758	0.55933	1.07602
23.5	5.08983	0.0602376	0.551939	0.107744	0.657673	1.12418	1.56445	0.85748	1.78981	2.14792	0.0737116	0.489862
24	5.2286	1.03858	2.41124	0.885502	0.114688	1.65814	2.6495	3.78179	0.133868	0.258771	0.168019	0
B
ZT	WT						MT
0-6	0.24	0.38	0.745	0.225	0.345	0.175	1.205	0.465	0.345	0.555	0.675	0.595
6-12	0.67	0.845	1.07	0.365	0.925	0.885	0.315	0.905	1.015	0.94	0.785	0.81
12-18	2.965	3.065	3.16	3.155	3	2.865	2.45	2.055	2.045	2.17	2.7	2.255
18-24	1.655	1.09	1.36	1.385	1.26	1.69	2.1	1.45	1.29	1.015	1.27	0.905
C
WT	MT
16.4557	25.0412
22.7695	28.1026
28.6503	28.967
11.501	31.9444
22.9656	26.8877
18.878	30.7777
D
Time in DD (h)	WT												MT
36	6.10119	2.79791	7.67743	0	4.78389	4.33023	8.2327	0	0	0	0	0	6.98176	8.57851	0	9.98322	8.31504	9.84069	0	0	0	0	0	0
36.5	7.23375	1.03364	0.656672	0	3.48912	0	3.25416	0	0	0	0	0	0.0104726	0.860027	0	2.45058	7.08529	5.7697	0	0	0	0	0	0
37	0	0	0	0	2.3475	0	0	0	0	0	0	0	0	0	0	0	2.41504	1.34741	0	0	0	0	0	0
37.5	0	0	0	0.00562724	0	0.133536	0	0	0	0	0	0	0	0	0	0.00617322	0	0.0190739	0	0	0	0	0	0
38	0	0	0	0	0	4.17592	0	0	0	0	0	0	0	0	0	0	0	0	0	0	0	0	0	0
38.5	0	0	0	0	0	0	0	0	0	0	0	0	0	0	0	0	0	0	0	0	0	0	0	1.70789
39	0	0	0	0	0	0	0	0	0	0	0	0	0.0104726	0	0	0	0	0	0	0	0	0	0	0
39.5	0	0	0	0.0170523	0	0	0	0	0	0	0	0	0	0	0	0	0	0	0	0	0	0	0	0
40	0	0	0	0	0	0.00412999	0	0	0	0.0475676	0	0	0	0	0	0	0	0	0	0	0	0	0	0
40.5	0	0	0	0	0	0	0	0	0	0.306792	0.0117201	0	0	0	0	0	0	0	0	0	0	0	0	0
41	0	0	0	0	0	0	0	0	0	0	0	0	0	0	0	0	0	0	0	0.194535	0	0	0	0
41.5	0	0	0	0	0	0	0	0	0	0.00868401	0	0	0.109415	0.372979	0	0	0	0	0	0	0	0	0	0
42	0	0	0	0	0	0	0	0	0	0	0	0	0	0	0	0	0	0	0	0	0	0	0	0.0268877
42.5	0	0	0.0551015	0	0	0	0.00550705	0	0	0	0	0	0	0	0.00346481	0	0	0	0.046591	0	0	0.0310141	3.30191	0
43	2.77056	0.121146	0	0.011425	0	0	0	0	0	0	0	0	0	0	0	0	0	0	0	0	0	0	0	0
43.5	0.0548011	0	0	0	0	0	0	0	0	0	0	0	0	0	0	0	0	0.0663315	0	0	0	0	0	0
44	0	0	0	0	0	0	0	0	0	0	0	0	0	0	0	0	0	0	0	0	0	0	0	0
44.5	0	0	0	0	0.0123798	0	0	0	0	0	0	0	0	0	0	0.299308	0.0111462	0	0	0	0	0	0	0
45	0	0	0	0	0	8.00554	0	0.0179981	0	0	0	0	0	0	0	0	1.43418	0	0	0.0186198	0	0	0	0
45.5	0	0	0	0	0	7.142	8.06583	0	0	0.0518448	0.00577258	0	0	0	0.171456	0	2.73081	0	0.0232955	14.3214	2.2443	0	0.0384434	0.0538909
46	0	0	0.0230049	0	0.308903	6.55379	0	0	0	0	0.0407579	0	0	0.0519062	0	0	0	0	0	11.6813	0	0	0	0
46.5	0	1.5718	0	0.369522	5.77976	5.78198	0	0	0	0	0	0.00967555	0	0	0.0944949	0	2.32587	0.322548	0	10.3659	0	0	0	0
47	0	5.27857	0	0	7.97893	5.37311	0	0	0	5.24061	0	0	3.65242	10.9305	8.31209	0.0125335	9.58203	0	3.98737	0	0	2.58253	0	4.08509
47.5	7.21548	7.58452	0	9.93583	7.63792	5.53581	10.3911	5.62502	2.49183	7.29716	0	1.65105	10.2329	14.6292	5.38968	13.0199	8.1367	10.8274	10.584	7.13303	2.71158	11.7784	10.9906	9.43575
48	7.20324	8.40079	3.87543	10.9419	8.13957	4.64311	12.4214	12.31	9.01663	7.9841	9.43432	13.1078	10.6758	11.1272	8.80199	6.27929	8.64943	15.316	8.96096	10.7086	11.5808	10.0206	11.328	9.25492
48.5	13.7003	6.16958	12.9534	11.425	4.19084	3.92975	10.163	12.1837	12.4537	7.22808	9.21864	10.4554	8.06544	7.9258	4.47276	1.42171	7.64627	6.48141	9.45413	13.9879	14.7288	11.3989	10.8453	7.65089
49	11.9589	6.01635	10.5382	7.52567	5.67346	5.97809	11.8764	9.4547	8.49259	6.23862	9.16616	9.64667	4.27234	3.49139	4.8962	19.4176	9.03208	11.169	8.09134	3.61279	12.1713	8.77374	10.3797	8.43179
49.5	2.72179	8.20468	6.44233	10.9646	5.33498	2.72829	1.02915	5.68362	6.48381	6.01828	8.22733	9.60811	9.50862	0	6.60068	0.0622934	6.42387	0.778043	8.63879	0	10.1273	10.5355	7.93639	4.06582
50	0	4.79024	7.59023	8.61138	6.36287	3.41662	0	9.55389	10.7378	5.5474	9.23036	9.93073	5.23628	9.17932	7.30761	11.7914	0.0186141	0	5.12117	0.0925429	6.69684	8.83181	9.33753	0
50.5	0	7.0392	3.61838	8.78191	5.50051	0	0	8.13745	4.16152	5.21041	5.76681	5.58871	0	0.279734	4.75624	0.0312402	0.880548	0	0	8.35582	0	3.14404	4.04079	0
51	0.018267	5.15026	0	4.7291	4.7913	0	0	0	7.64487	5.83254	0.0117201	7.36021	0	0	6.14564	0	4.03491	0	0	0	0	0	10.8539	5.15056
51.5	12.0075	5.73835	0	5.25209	5.33987	0	0	0	5.61543	4.66603	0.00577258	0.0480889	0	0	5.48417	0	0	0	0	0	0	0	1.73854	7.43936
52	0.121841	3.80653	0	7.93492	5.54743	0	0	0	8.13809	0	0	0	10.3319	8.81691	7.41964	0	0.624186	6.44327	0	0	0	0	0	0
52.5	0	0	1.60717	2.61462	0.0098594	6.94589	0	0	0.863131	0	1.60355	0	1.23998	8.97232	0	0.180894	7.53481	7.9333	8.17288	0	0	0	0	0
53	1.27266	0.00716398	10.1204	0	0	4.83496	2.70897	0	0	0	9.09619	0	3.40233	0.725133	0.773493	10.8748	0.252684	8.96756	8.37473	7.74443	0	0	0	3.77732
53.5	4.44492	6.57942	0.00454587	0	0	5.06862	12.9554	0	0	7.61251	7.77847	5.98339	10.9466	0	5.87969	5.48107	0.074345	1.12934	6.25484	2.95498	0	4.3249	0.00422878	7.45852
54	0	0.338632	0	0	0.00741308	4.12586	0.973413	5.23705	0	7.76376	6.26238	7.45162	0.187568	0	5.40721	0	5.51368	0	3.54476	0	0	9.2113	0	9.278
54.5	0	0	1.67137	0	0	3.97981	0	7.43377	0.395653	8.12668	0.291603	0	0	0.0519062	4.68621	0	0	0	0	0	0	8.15427	0	4.86207
55	0	0	7.32395	0.011425	2.47352	0.0375453	0	10.3162	8.27172	5.65536	0	0.0818812	0	0	4.72821	0	0	2.45768	0	0	0	0.956326	0	0
55.5	0	0	5.47337	0	5.77976	0	0	4.83108	6.28852	0	0	0	0	0	0.0209989	0	0	0	0	0	0	0	0	0
56	0	0	0	0	1.02056	0	0	0	1.18172	0	0.466529	0.00967555	0	0	0	0	0	0	0	0	0	0	0	1.65792
56.5	0	2.5306	0	0	0	0	0	0	0	0	8.88628	0	0	0	0	0	0	0	0	0	2.26987	0	0	4.96211
57	0	6.58659	1.85045	0.323993	0	0	0	0	0	2.88607	4.60635	6.43107	0	0	0	0	3.95689	0.00939459	0	0	11.7194	0	0	0
57.5	0	0.645079	8.1688	6.94026	0	0	9.60112	0	5.5692	2.67429	1.42863	5.13627	0	0.0413385	1.06748	0	0	0	0	2.65873	6.65062	0	0.918414	0.773167
58	4.7982	0	0	3.05235	0	0	3.72143	0	0.498304	3.49084	2.16332	0.308029	3.04283	1.5749	4.28377	0	0	0	4.52317	3.84428	7.53389	1.97468	6.10828	3.93126
58.5	7.12415	0.506077	0.0183213	0.551299	0.815439	2.92854	0	5.17385	0	0.112374	0	5.03519	4.71	3.77113	3.29682	5.33142	3.32156	0	8.76691	2.32524	4.37551	6.47381	6.84716	0
59	3.49503	6.2872	5.23464	0	3.02454	2.97021	0	3.19365	0.0257398	0	0.997082	2.15649	0	0	0	8.07513	0	0.170811	5.34247	0	7.16921	1.80823	4.45944	4.35431
59.5	7.75746	2.81566	5.09689	0	3.64968	1.37666	4.60039	0.848077	1.66969	0	5.30028	0	7.38284	8.61985	0	5.28147	0	10.951	0.112634	0	0.020491	0	0.871385	1.64246
60	4.77838	1.8854	2.67223	2.47883	3.67696	0	6.05147	0	1.33053	0	0.953804	0	7.80759	4.66598	0	0	6.2124	8.17332	0	0	0	0	0	0
E
Tim in DD (hrs)	WT												MT
36-42	0.11	0.43	0.2	0.15	0.5	0.52	0.28	0.68	0.2	0.65	0.3	0.09	1.78	0.96	1.03	0.45	1.08	0.39	0.75	1.29	1.12	0.97	0.41	0.64
42-48	0.8	0.66	0.64	1.04	0.86	0.83	0.07	0.22	1.03	1.23	0.57	1.1	0.72	0.65	1.13	0.97	3.03	1.05	1.48	1.12	1.19	1.41	1.35	0.92
48-54	1.9	2.87	2.68	4.12	2.6	2.48	2.56	3.5	3.54	2.73	2.64	2.87	2.43	2.66	2.03	2.1	0.3	1.43	2.22	2.47	2.17	1.46	2.03	2.06
54-60	2.37	1.63	1.77	1.93	1.84	1.9	1.5	1.24	1.43	1.46	1.63	2.13	1.41	0.74	1.09	1.54	1.95	1.25	1.01	1.15	1.58	1.63	0.63	1.72
F
WT	MT
17.5676	39.4322
19.4991	32.1357
15.879	40.9091
16.4365	28.0632
23.4483	64.6226
23.5602	34.9515
7.93651	40.8425
15.9574	39.9668
19.8387	38.1188
30.972	43.5101
16.9261	39.819
19.2246	29.2135
G
Time in DD (h)	WT			MT
36	1.625	1.704	1.113	1.136	1.131	1.074
42	0.741	0.73	0.845	0.723	0.736	0.642
48	0.67	0.833	0.684	0.717	0.648	0.75
54	0.979	0.904	1.172	0.888	1.048	0.961
60	1.625	1.704	1.113	1.136	1.131	1.074
H
Time in DD (h)	WT			MT
36	0.642	0.53	0.659	0.712	0.631	0.671
42	0.845	0.918	0.963	0.806	0.786	0.753
48	1.259	1.648	1.372	0.908	0.872	1.052
54	1.051	1.052	1.062	0.817	0.793	0.652
60	0.642	0.53	0.659	0.712	0.631	0.671
I
Time in DD (h)	WT			MT
36	0.811	0.964	0.556	0.73	0.653	0.618
42	1.203	1.148	1.432	1.164	1.324	1.267
48	1.349	1.424	1.102	0.935	0.897	0.728
54	0.69	0.703	0.618	0.517	0.559	0.543
60	0.811	0.964	0.556	0.73	0.653	0.618
J
Time in DD (h)	WT			MT
36	0.774	1.246	1.03	0.736	1.154	0.977
42	0.778	0.859	0.907	1.001	1.011	1.081
48	1.286	1.036	1.34	0.771	0.843	0.891
54	0.815	0.909	1.02	0.669	0.891	0.743
60	0.774	1.246	1.03	0.736	1.154	0.977
K
Time in DD (h)	WT			MT
36	0.764	1.404	1.081	0.808	1.161	0.8
42	0.595	0.536	1.041	0.965	0.873	0.89
48	1.61	0.963	1.42	0.978	0.828	0.896
54	0.771	0.867	0.947	0.5	0.626	0.521
60	0.764	1.404	1.081	0.808	1.161	0.8
L
Time in DD (h)	WT			MT
36	0.572	1.744	0.886	1.169	0.405	0.323
42	0.988	0.909	1.282	0.963	1.428	0.918
48	0.492	1.144	0.899	0.784	0.677	1.796
54	1.111	0.883	1.09	0.743	0.744	0.719
60	0.572	1.744	0.886	1.169	0.405	0.323
