# Supplementary material for: An adipokine feedback regulating diurnal food intake rhythms in mice
Source: eLife. 2020 Jul 9;9:e55388. doi: 10.7554/eLife.55388 (PMC7375813; doi:10.7554/eLife.55388)
Supplement: Figure 3—source data 1. [file elife-55388-fig3-data1.xlsx]

## Sheet: Sheet1
A
Zeitgeber time (hr)	WT						MT
0	4.6975	3.14462	1.16136	4.53247	2.3484	1.78988	0	0.0425017	2.65925	3.53965	1.39205	4.4883
0.5	5.58477	2.52402	1.67633	1.55639	2.388	2.06817	0	0	3.12969	3.71208	1.13343	5.56054
1	4.50621	2.11862	1.58594	0.00254175	1.82534	1.65334	0	0	2.07815	3.26779	0.6051	4.42965
1.5	3.22011	0.952807	1.22138	0	1.29657	0.878803	0	0.00224315	0.350797	3.09093	0.434008	2.94366
2	1.89521	0.221578	0.650618	0	1.00285	0.777263	0	0.00898945	0.0492711	2.75289	0.553643	2.22056
2.5	0.506953	0	0.221392	0	0.849745	0.776204	0.00231862	0.010676	0.00090866	2.85548	0.569189	1.8971
3	0.00064014	0	0.0416754	0.238899	0.65615	0.758773	0.00231862	0	0.00090866	2.2324	0.654204	1.0458
3.5	0.00193982	0	0.0113668	0.591364	0.592303	0.466036	0	0	0	1.45973	1.13838	0.0567255
4	0.0433356	0.00056687	0	0.240602	0.475386	0.418834	0	0.0168826	0	0.714948	1.20384	0.00036469
4.5	0.0148784	0.310937	0.00215969	0.33635	0.379338	0.331428	0.0038721	0.12931	0	0.0594513	1.13496	0
5	0.0840525	0.754145	0.00162382	0.29736	0.511126	0.562675	0.0038721	0.0938748	0	0	1.53093	0.00295065
5.5	0.214021	0.772439	0	0.0152505	0.449155	0.433487	0	0.0247421	0	0	1.34478	0.00221023
6	0.00711915	0.14773	0	0.00254175	0.273095	0.259798	0.00231862	0	0	0.00600759	0.902644	0.0140018
6.5	0.0032395	0.00802208	0	0	0.136121	0.133737	0.00461406	0	0.00180376	0.00428837	0.457329	0.0213729
7	0	0.00056687	0.00026793	0.0194952	0.0465909	0.0562562	0.00076515	0.0382347	0.00180376	0.0206112	0.133994	0.012532
7.5	0	0.0343558	0	0.0550798	0.0200232	0.0243514	0	0.223758	0.00090866	0.012453	0	0.00148085
8	0.0446159	0.231902	0.0354481	0.737973	0.0559359	0.0760661	0	0.00055657	0.015827	0.0148097	0.00435545	0.00811153
8.5	0.056895	0.720338	0.0373479	0.582062	0.147854	0.163252	0.00076515	0.00055657	0.921328	0.0148097	0.00435545	0.00663068
9	0.0122791	0.648191	0.00081191	0.182142	0.171762	0.101201	0	0.00055657	1.65231	0	0	0.00405577
9.5	0	0.678545	0.00081191	0.361768	0.290285	0.186125	0	0.00055657	2.52888	0.0789808	0.109741	0.00036469
10	0.60988	1.65045	0.170502	1.05889	0.711234	0.794832	0	0.00325509	3.25916	0.114395	0.868571	0.00839886
10.5	1.47039	3.14493	1.0045	1.85345	1.29886	1.52398	0	0.00067463	3.18709	0.108175	1.91795	0.210856
11	0.846539	4.45468	1.38647	1.17088	1.60237	1.78017	0	0.00067463	4.34566	0.383075	2.15344	0.62587
11.5	2.56509	3.79115	1.99026	0.428718	1.76824	2.07364	0	0	6.2987	1.07895	1.2693	1.34676
12	5.80523	4.57391	3.28392	4.56837	3.03631	4.59609	3.44392	4.07421	6.13912	1.97999	1.66611	2.16345
12.5	5.24722	6.23273	3.93751	6.59412	4.51693	3.8046	7.38479	7.90387	6.28876	3.08406	3.38262	3.86054
13	5.29603	5.90463	4.24563	6.37599	4.67283	4.60717	7.1027	7.66451	7.20829	4.35611	3.80509	5.4414
13.5	4.69629	5.1637	4.45766	6.11203	4.57515	5.11582	6.9273	5.27222	5.33761	3.50131	3.89058	5.40474
14	4.27665	4.87282	4.36673	5.58083	4.39572	4.20353	6.20929	5.53195	5.22776	3.43971	3.62271	5.453
14.5	4.05165	4.39584	4.38	5.75028	4.30032	5.11868	6.40946	5.01868	4.74358	3.37146	3.59198	5.61473
15	2.6207	4.23494	4.3532	6.07647	3.93339	4.93986	6.78194	5.17384	3.39505	3.1916	3.10309	5.12295
15.5	2.47589	4.13702	4.47904	5.28934	3.6942	4.52712	6.31437	4.91411	2.33269	3.12486	2.92482	4.787
16	3.53244	3.77516	4.44413	4.37182	3.76651	4.58774	7.2913	5.09233	2.84038	2.76855	2.99994	5.02571
16.5	2.73129	2.53548	4.18	3.68303	3.7335	2.82771	7.62595	4.7269	4.04966	2.70932	3.4143	4.48199
17	1.20983	2.30986	4.38784	2.15881	3.79431	3.72736	4.93578	4.75896	3.36564	3.29956	3.69006	4.70521
17.5	0.724194	1.86896	4.50503	1.31581	3.75805	4.89635	4.17836	4.56165	2.28472	3.65736	3.74211	2.86028
18	0.737133	1.94341	4.35294	1.09295	3.12642	2.96762	4.57462	4.07084	2.39733	3.19998	3.23909	2.26968
18.5	1.49106	2.21708	4.27499	1.13022	2.71587	2.0227	3.13322	3.28545	0.874755	2.83746	2.99453	2.14945
19	1.5622	1.5586	3.90395	0.529523	2.46931	2.03845	2.97632	1.46339	0.0592257	2.77994	3.21589	1.9752
19.5	1.69345	1.05129	3.81193	0.303307	2.41826	2.10383	3.23833	1.72314	0.0122059	1.8905	3.68052	1.71514
20	1.95922	0.9677	3.88825	3.00608	2.57842	2.72669	3.02114	2.05538	0	2.39788	3.55701	1.47975
20.5	2.25537	0.950523	4.27635	3.74741	2.73529	2.21609	1.17941	2.27858	0.0072286	2.82865	3.58927	2.0511
21	2.59096	1.39772	4.16159	2.66205	2.8359	2.2824	0.616753	3.77233	0.7545	3.12378	3.5171	1.68677
21.5	2.58126	1.57693	3.26903	0.933662	2.57293	2.55047	0.422777	4.04104	0.875664	3.11474	3.46128	0.710952
22	3.88934	2.00866	2.47769	0.923495	2.58661	2.18218	0.53639	4.32327	0.106245	3.38304	3.61788	0.354741
22.5	2.92979	2.16844	1.57727	1.3192	2.28838	2.61665	0.547937	3.89823	0.0203432	3.35171	3.22437	0.258961
23	2.34137	2.38314	0.629224	2.51212	2.19059	1.76412	0.262746	3.08755	1.89735	2.98105	3.04151	0.517569
23.5	3.06684	2.66258	0.361301	4.56247	2.13002	1.90546	0.665444	1.39988	4.70198	2.64214	2.11838	0.84172
24	3.84895	2.79828	0.794542	5.13639	1.87806	1.583	0.19891	0.309655	3.59747	2.46331	1.39353	1.15971
B
	WT						MT
0-6	0.18	0.29	0.06	0.26	0.29	0.36	0.84	0.87	0.35	0.82	0.97	0.47
6-12	0.25	0.45	1.54	0.75	0.06	0.25	0.5	0.83	0.31	1.54	0.61	0.75
12-18	3.49	3.63	2.84	2.94	3.79	3.26	2.53	1.75	1.71	2.06	2.9	2.67
18-24	1.87	1.21	1.5	1.4	1.72	1.13	1.84	1.59	1.62	1.61	1.66	2.02
C
WT	MT
8.02	30.66
15.29	50.9
36.87	19.82
23.27	64.31
6.35	34.65
13.9	26.01
D
Time in DD (hr)	WT						MT
36	0.0556856	0.0525535	3.88416	5.36133	0.09896	2.58328	0.0502438	0.786328	5.64122	0.486316	1.11299	0.796506
36.5	0	0	3.71698	5.36133	0.398479	1.13839	0.00524634	1.23733	5.26741	0	0.254714	0.253735
37	0	0	4.38425	7.50245	0.675567	0.235601	0	0.506647	2.18626	0	0	0
37.5	0	0	4.267	5.97339	0.00263893	0.00555992	0	0.0117144	0.509749	0	0	0
38	0	0	1.97139	3.06666	0	0.00555992	0.00322852	0	0	0	0	0
38.5	0	0.044119	1.43874	0.882892	0	0.0597691	0	0	0	0	0	0
39	0	0.00648809	0.882928	0.0106629	0	0.118148	0	0.00439289	0	0	0	0.07943
39.5	0	0.00129762	0	0	0	0.00069499	0	0	0	0	0	0.346403
40	0.0705351	0	0	0.0213259	0	0	0	0	0	0	0	0.0169157
40.5	0.0705351	0.0519047	0.010132	0	0	0.00208497	0	0.0029286	0	0	0	0.0617789
41	0	0.109	0.010132	0	0	0	0.0117034	0.0029286	0	0	0	0
41.5	0	0	0	0	0	0	0.068606	0	0	0	0.00184575	0
42	0	0.199833	0.0260536	0.00426518	0	0	0	0	0	0	0.00184575	0
42.5	0	0.0752618	0	0.00426518	0	0	0	0.00439289	0	0	0	0
43	0.0148495	0	0.0405278	0	0	0	0	0.0175716	0	0	0	0
43.5	0.0371237	0	0.0405278	0	0	0.00277996	0	0.0117144	0	0	0	0
44	0	0.303642	0	0	0	0.00347495	0.469346	0.00585719	0	0	0	0.0198575
44.5	0.0111371	0.298452	0	0.0127955	0	0.00069499	2.04365	0.0029286	0	0	0	0.0198575
45	0.00371237	0	0.00144742	0	0.613552	0	2.60541	0	0	0	0	0
45.5	0.00371237	0	0.00144742	0	5.13141	0	2.808	0	0	2.20058	1.14621	0
46	0	0	0.0390804	0	6.45747	0.246721	3.64136	0.00439289	0	5.97966	5.75321	0.169156
46.5	0	1.71285	0	0.0149281	6.13156	1.33646	4.60588	0.134715	0.0415351	6.85908	7.31287	1.31354
47	2.84739	4.20817	0.2808	0.0725081	6.59074	2.43107	4.31491	1.9812	3.09625	7.48319	8.04378	2.23507
47.5	7.77371	6.43229	0.167901	0	5.40981	4.55705	4.5171	4.18057	9.68523	7.74459	7.40885	3.46624
48	11.4861	6.90499	6.11247	6.33556	8.43521	6.87883	4.86981	6.10905	12.1622	7.53587	6.74438	5.08646
48.5	8.88	6.61433	5.93444	5.77682	5.8502	5.62446	4.98887	7.00667	10.4517	8.7608	5.18063	5.52259
49	9.7227	7.99629	2.40562	4.25841	5.31877	4.7579	5.09218	7.73735	11.0446	8.20861	5.96547	5.41448
49.5	10.6991	8.05209	5.77811	4.22253	7.45763	4.35897	4.58369	7.91307	9.88536	3.06784	7.7743	5.19531
50	6.23679	5.74325	5.09927	2.41836	5.56815	4.00175	5.4344	7.01692	12.2415	0.652474	5.44866	5.36153
50.5	7.52127	6.21818	4.73307	2.47594	6.3915	4.44654	4.77175	5.51162	2.8697	6.64632	6.48228	4.72167
51	3.51933	6.39206	5.98944	2.96217	6.66595	4.94416	5.02034	5.61705	0	8.93606	6.67055	5.23061
51.5	8.59043	7.58068	6.33971	4.84738	1.52003	4.89968	5.47072	7.74906	2.73377	8.31601	3.28913	5.38359
52	9.42943	7.75975	0.0289485	0	5.45863	4.88091	5.67089	8.039	11.4335	6.40722	0.169809	5.15707
52.5	9.82665	6.26749	0.0463175	0.142884	5.20925	5.12485	5.13496	7.82814	5.70164	5.40622	0	4.65254
53	5.8327	5.6109	5.80417	4.8751	5.10416	5.16655	4.67731	5.55262	0	4.86316	0.0036915	5.73367
53.5	4.79324	4.58059	6.10668	4.60426	4.56318	4.71898	4.88475	5.66683	0	0.555211	0.0036915	4.99526
54	0	5.94309	5.17599	2.79796	4.43124	5.11929	5.70479	6.06512	0	0	0	4.74668
54.5	0	5.87042	4.98348	4.46351	4.27011	2.36713	5.29073	5.49697	0	0	0	4.85994
55	0.0148495	3.06497	4.86334	6.86907	4.52841	0	4.65633	7.46792	0	0	0	4.76433
55.5	0	0.00259523	5.12533	4.80686	0	1.78751	4.49894	3.14238	0	0	0	4.80846
56	0	0	2.68642	4.4038	0.672928	4.883	4.80807	0.251859	0	1.86826	3.3888	5.25856
56.5	0	0	2.22758	3.99861	0.572649	4.4938	4.11555	0	0	4.58353	7.36086	4.58782
57	1.98241	0.0129762	2.54602	3.47186	0	4.83157	0.316395	0	0	2.65853	7.17997	4.89671
57.5	1.70027	0.72407	1.66309	2.97496	0	4.96222	0	0.243073	0	0	6.5598	4.08182
58	0.0816722	4.1939	1.55453	3.29485	0	4.47017	0	0.231359	0	0	4.68452	4.08476
58.5	0	4.64806	0.557258	4.08391	0	4.45071	0.368858	0	0	0	4.23046	2.31965
59	0	3.94216	1.0957	4.55521	0.00263893	4.4938	0.872507	0.014643	3.43609	0.498474	3.58076	0.435394
59.5	0	1.79331	3.88778	4.81326	0.74154	4.13797	1.19939	0	10.8746	1.80342	2.20383	0
60	0.0556856	0.0525535	3.88416	5.36133	0.09896	2.58328	0.0502438	0.786328	5.64122	0.486316	1.11299	0.796506
E
	WT						MT
36-42	0.53	0.18	0.46	0.11	0.18	0.07	0.73	0.09	0.27	0.33	0.29	0.06
42-48	0.48	0.35	0.44	0.39	0.24	1.09	0.53	1.38	1.49	0.34	0.82	1.55
48-54	3.04	4.13	2.67	2.75	3.53	3.65	1.8	1.97	2.35	2.27	2.62	2.61
54-60	0.74	1.53	1.88	1.21	0.92	1.08	2.19	1.44	1.13	0.73	1.38	1.88
F
WT	MT
26.72	31.58
9.36	43.11
19.78	50.57
12.63	22.33
9.44	27.75
24.52	35.86
G
Time in DD (hr)	WT			MT
36	1.92	1.6	1.58	1.06	1.17	1.26
42	0.57	0.33	0.61	0.48	0.61	0.54
48	0.65	0.46	0.59	0.52	0.41	0.46
54	1.08	1.38	1.22	1.27	1.24	1.07
60	1.92	1.6	1.58	1.06	1.17	1.26
H
Time in DD (hr)	WT			MT
36	0.65	0.47	0.88	0.77	0.59	0.58
42	1.03	1.04	1.78	0.55	0.65	0.69
48	1.26	1.73	1.73	0.78	1.36	0.97
54	0.74	0.27	0.42	0.55	0.54	0.45
60	0.65	0.47	0.88	0.77	0.59	0.58
I
Time in DD (hr)	WT			MT
36	0.23	0.48	0.39	0.29	0.61	0.6
42	1.16	1.48	1.76	1.57	1.07	0.71
48	1.31	1.78	1.93	0.8	1.4	1
54	0.76	0.28	0.43	0.57	0.56	0.46
60	0.67	0.48	0.91	0.29	0.61	0.6
J
Time in DD (hr)	WT			MT
36	0.95	1.05	1.17	1.12	1.02	1.33
42	0.86	0.87	0.88	0.81	1.05	1.12
48	1.51	1.08	1.81	0.45	1.19	1.14
54	1.05	0.8	0.95	0.78	0.63	0.76
60	0.95	1.05	1.17	1.12	1.02	1.33
K
Time in DD (hr)	WT			MT
36	1.15	0.81	0.68	1.14	1.07	1.06
42	0.62	0.59	0.63	0.54	0.62	0.9
48	1.55	0.94	1.89	0.52	1.06	0.94
54	1.27	0.86	1.01	0.86	0.37	0.45
60	1.15	0.81	0.68	1.14	1.07	1.06
L
Time in DD (hr)	WT			MT
36	1.05	1.23	0.68	1.14	1.01	1.19
42	0.83	0.86	0.63	0.43	0.91	0.82
48	1.04	1.04	1.32	0.57	1.18	1.3
54	0.78	0.75	1.17	0.71	0.56	0.62
60	1.05	1.23	0.68	1.14	1.01	1.19
