# Supplementary material for: An adipokine feedback regulating diurnal food intake rhythms in mice
Source: eLife. 2020 Jul 9;9:e55388. doi: 10.7554/eLife.55388 (PMC7375813; doi:10.7554/eLife.55388)
Supplement: Figure 4—source data 1. [file elife-55388-fig4-data1.xlsx]

## Sheet: Sheet1
B
ZT	MT / AR rhythmic																MT / AR constant																MT / Veh rhythmic																WT
0-6	0.015	0	0	0.085	0.195	0	0.225397	0	0.08566	0.281063	0.194361						0.925921	0.490406	0.309867	0.286407	0.752215	0.584335	0.348739	0.520793	0.7605	0.318813							0.405	0.585	0.41	1.45493	0.355137	0.059168	0.323152	0.059897	0.395043	0.915789	0.592168	0.774438	0.457637	0.490259	0.803139	1.02639	0.147632
6-12	0.865	0.645	0.08	0.61	0.945	0.44	0.782959	0.783949	0.95368	0.562127	0.653759						0.811425	0.527371	0.903467	1.05274	0.510244	0.632363	1.29532	0.353566	0.783365	0.062207							0.425	0.825	1.04	1.32145	0.422782	0.213208	0.483323	0.469721	0.678664	0.366316	1.62846	1.21195	0.825793	0.499779	0.322473	0.322005	0.295263
12-18	1.705	2.43	2.235	1.99	1.58	1.8	2.00485	1.60162	2.10152	2.30233	2.35						0.971601	2.00401	1.4528	1.9197	1.91462	1.2167	1.64405	1.44771	1.92811	1.96731							1.625	1.07	1.925	1.0011	1.80951	0.936537	1.83213	2.09018	2.0819	1.64842	1.88214	1.14016	1.35757	1.88012	2.0417	1.46915	2.18105
18-24	1.27	0.885	1.725	1.51	1.655	2.03	1.31679	1.26443	1.35914	2.25448	1.50188						0.139386	1.08488	1.65387	0.841158	1.37292	1.05661	0.398559	1.44293	1.08758	2.30167							1.56	0.325	1.375	0.787529	1.27257	0.511087	1.96139	1.66136	1.4181	1.70947	0.69723	0.563228	1.04566	0.894842	1.53935	1.19746	1.18105
C
WT	MT / AR constant	MT / Veh rhythmic	MT / AR rhythmic
13.4328	32.6621	20.6725	22.8275
16.3728	26.3489	50.2674	21.7905
15.7616	65.6015	30.5263	2.63158
16.9713	16.6667	20.1533	19.8855
17.4941	22.807	27.6316	26.0571
16.4557	26.5781	39.0698	10.3044
16.6667	34.8624	22.8448	21.4781
17.9195	44.5946	17.9195	23.2877
17.5321	23.2233	17.5321	23.0965
	16.4557	44.4126	15.6146
		33.9964	18.0451
		52.4568
		34.8128
		26.2958
		23.4177
		33.584
D
	MT/Veh rhythmic			MT/AR rhythmic			MT/AR constant			WT
3	1.12	0.72	1.01	0.23	0.31	0.67	1.47	0.71	0.89	1.07	1.14	0.78
15	0.99	0.91	1.13	1	1.45	1.73	1.15	0.86	1.07	1.35	1.47	1.55
E
	MT/Veh rhythmic			MT/AR rhythmic			MT/AR constant			WT
3	0.8	1.45	1.11	0.55	0.54	0.4	0.94	1.17	1.23	0.99	0.82	1.18
15	0.93	1.22	0.78	1.43	1.06	1.25	1.18	0.93	1.34	1.81	1.49	1.96
F
	MT/Veh rhythmic			MT/AR rhythmic			MT/AR constant			WT
3	1.11	2.58	1.02	0.37	0.52	0.3	1.43	1.47	0.97	0.94	1.14	0.93
15	0.92	1.38	1.18	1.75	1.65	1.41	1.16	1.25	1.27	1.72	1.61	1.8
[truncated: 8 more columns]
