# Supplementary material for: An adipokine feedback regulating diurnal food intake rhythms in mice
Source: eLife. 2020 Jul 9;9:e55388. doi: 10.7554/eLife.55388 (PMC7375813; doi:10.7554/eLife.55388)
Supplement: Figure 5—source data 1. [file elife-55388-fig5-data1.xlsx]

## Sheet: Sheet1
B
Time after sync	PBS hr 13			PBS hr 23			gAcrp30 hr 13			gAcrp30 hr 23
23	-1795.2	-1847.84	-1807.48	-1700.64	-1177.96	-1291.12	-1221.04	-1092.2	-1309.82	-2261.32	-2256.64	-1910.04
23.5	-2082.35	-1830.08	-1982.69	-1694.19	-1300.81	-1305	-1383.5	-1100.85	-1430.36	-1974.23	-1783.35	-1628.5
24	-2203.78	-1895.48	-2105.74	-1896.96	-1597.04	-1589.67	-1543.82	-1397.26	-1648.25	-1686.22	-1475.85	-1484
24.5	-2481.79	-2356.75	-2436.07	-2225.21	-1662.32	-1863.04	-1808	-1582.96	-1842.45	-1880.11	-1706.68	-1537.43
25	-2690.41	-2397.59	-2397.69	-2316.34	-1805.28	-1840.48	-2227.97	-1754	-2154.45	-1951.72	-1590.76	-1558.97
25.5	-2908.87	-2644.33	-2598.07	-2477.77	-1862.73	-2114.13	-2142.83	-2057.03	-2267.64	-1995.9	-1729.4	-1680.63
26	-2981.36	-2712.61	-2693.94	-2657.45	-2189.81	-2228.52	-2669.64	-2193.48	-2550.11	-2069.42	-1759.81	-1617.42
26.5	-3058.03	-2656.91	-2829.75	-2639.94	-2055.81	-2148.53	-2758.56	-2406.88	-2681.72	-2150	-1654.84	-1755
27	-3153.49	-2679.97	-2832.42	-2656.79	-2204.21	-2127	-2941.33	-2528.88	-2801.85	-2134.39	-1747.48	-1932.55
27.5	-2929.68	-2789	-2885.59	-2597	-2175.62	-2380.44	-3025.85	-2431.79	-2806.71	-2044.09	-1831.73	-1725.85
28	-3139.34	-2668.6	-2680.14	-2536.26	-2221.74	-2291.14	-2986.09	-2544.63	-2813.94	-2111.6	-1678.29	-1660.97
28.5	-2890.58	-2657.03	-2645.22	-2558.83	-2120.53	-2172.97	-2695.08	-2747.83	-2761.54	-1899.67	-1597	-1582.06
29	-2777.59	-2394.27	-2622.32	-2342.03	-2137.41	-2157.92	-2982.3	-2496.97	-2735.39	-1713.13	-1519.24	-1511.97
29.5	-2393	-2327.18	-2461.08	-2116.76	-1910.79	-1950.03	-3132.61	-2445.61	-2716.19	-1739.87	-1477.03	-1387.37
30	-2365.95	-2137.05	-2212.41	-1916.28	-1731.54	-1689.56	-2901.95	-2532.74	-2586.35	-1443.2	-1143.69	-1170.85
30.5	-2141.18	-1905.78	-1923.47	-1719.65	-1775.38	-1532.75	-2517.12	-2522.47	-2381.97	-1177.75	-992.125	-1052.8
31	-1829.1	-1698.78	-1479.63	-1408.1	-1401.61	-1198.34	-2387.54	-2371.49	-2154.93	-1107.83	-923	-658.707
31.5	-1388.36	-1248.33	-1209.9	-1099.31	-1224.29	-887.238	-2009.83	-2058.41	-1826.43	-849.214	-539.405	-530.691
32	-672.186	-960.837	-757.139	-597.232	-1116.37	-676.186	-1683.95	-1981.67	-1590.65	-441.721	-282.093	-248.721
32.5	-522.75	-427.864	-340.182	-466.591	-768.25	-337.795	-1253.2	-1490.39	-1072.31	-71.0227	-35.7955	-182.046
33	173.711	-310.244	-35.4667	-72.5333	-684.556	45.9333	-776.6	-1250.93	-768.82	-27.8444	204.333	340.578
33.5	802.696	251.239	676.717	453.413	-51.413	373.435	-432.935	-950.891	-398.537	523.565	430.978	744.696
34	1020.96	806.255	783.808	612.277	-14.383	944.638	-4.85106	-517.426	59.1844	980.723	844.872	1199.16
34.5	1538.15	1165.94	1293.98	1201.98	362.396	1087.15	521.125	239	630.475	1306.65	979.396	1448.9
35	2196.2	1593.29	1804.51	1483.55	813.265	1287.41	1117.51	55.9388	923.679	1510.65	798.449	1481.09
35.5	2491.9	1861.49	2255.65	1842.24	1194.94	1691.51	1723.47	706.633	1485.28	1666.29	1234.84	1797.46
36	2707.8	2214.31	2493.61	2052.9	1187.73	1913.43	1912.18	1319.65	1841.4	1853.2	1233.86	1907.16
36.5	3153.14	2575.12	2684.24	2404.33	1362.67	2098.39	1983.59	1236.82	1947.57	1739.24	1496.41	1994.09
37	3241.82	2931.61	3096.49	2837.18	1775.04	2207.67	2675.37	1630.35	2384.08	1848.31	1535.08	2297.53
37.5	3523.76	3043.31	2973.35	3094.37	1848.29	2555.74	2938.84	1881.45	2617.18	1829.27	1422.59	2267.45
38	3716.92	3130.74	3176.33	3011.04	2287.86	2561.41	2867.94	1966.45	2689.57	1630.88	1662.27	2188.86
38.5	3844.84	3278.16	3100.57	3070.55	2539.33	2636.24	3308	2348.43	3035.94	1998.33	1620.73	2464.24
39	4074.37	3184.24	3288.69	3132.71	2484.74	2803.2	3328.53	2572.49	3135.68	1978.06	1636.61	2465.45
39.5	3822.37	3304.84	3191.98	3150.06	2832.94	2778.55	3394.8	2913.49	3288.4	1957.35	1470.24	2422.19
40	3729.78	3224.86	3236.08	2998.24	2872.86	2600.43	3519.29	3133.57	3362.24	1985.29	1373.9	2429.35
40.5	3468.24	3061.24	3418.37	2974.82	2828.96	2494.53	3458.53	2975.8	3237.55	1486.53	1146.12	1790.41
41	3105.37	2935.59	2985.02	2497.16	2599.39	2331.14	3507.43	3213.06	3286.17	1416.94	984.49	1684.86
41.5	2981.41	2898.76	2864.92	2347.47	2693.06	2066.94	3148.37	2986.59	3037.28	1179.43	846.775	1508.24
42	2531.02	2623.2	2446.88	2306.57	2387.22	1705.2	3053.78	3160.12	2924.93	848.041	585.571	1210.52
42.5	2065.76	2351.14	2152.35	1816.39	2199.37	1558.37	2695.41	3095.33	2770.16	913.571	622.551	1275.55
43	1530.71	1866.51	1760.71	1739.43	2159.65	1335.8	2649.31	3289.94	2650.11	751	358.122	1073.24
43.5	1266.24	1473.92	1545.82	1595.55	1697.39	760.49	2111.47	2669.35	2173.62	478.633	291.469	925.827
44	781.265	1238.88	1133.63	1134.82	1748.73	734.327	1912.39	2665.71	2003.91	178.551	-303.837	493.439
44.5	539.184	738.98	595.796	760.225	1062.84	110.898	1841.92	2306.26	1730.92	66.0204	195.653	3.87755
45	14.2653	468.286	262.02	316.469	806.898	-104.408	1320.18	2021.73	1326.23	-154.388	64.8571	-329.694
45.5	-565.878	28.8367	102.102	-137.898	575.857	-305.408	1020.45	1697.69	998.597	-329.918	-240.98	-144.306
46	-595.612	-91	-277.143	-383.653	319.204	-374.551	490.143	1306.73	599.266	-623.898	9.42857	-368.041
46.5	-949.367	-363.408	-786.755	-741.673	-54.0204	-565.469	237.551	865.245	258.934	-547.898	-17.5714	-404
47	-1368.61	-654.388	-1235.31	-920.49	-169.469	-942.102	-202.061	666.469	-114.985	-523.857	-387.143	-668.878
47.5	-1538.22	-899.816	-1428.35	-1095.57	-560.143	-1125.49	-338.204	604.551	-253.608	-627.551	-329.51	-594.571
48	-1594.78	-1443.53	-1781.55	-1584.24	-782.837	-1425.37	-560.571	176.877	-571.871	-757.939	-511.918	-675.735
48.5	-1887.57	-1642.39	-1824.96	-1533.37	-454.184	-1275.12	-687.878	183.714	-690.062	-920.51	-708.184	-814.204
49	-2175.67	-1674.1	-1980.2	-1730.57	-1182.12	-1606.14	-1054.51	-506.694	-1101.48	-985.143	-672.98	-576.959
49.5	-2243.74	-1843.08	-2097.43	-1819.39	-1313.59	-1775.02	-1416.35	-393.673	-1238.76	-1115.86	-476.776	-704.327
50	-2270.35	-2150.22	-2342.78	-1932.02	-1428.49	-1921.78	-1512.47	-665.469	-1399.19	-1115.37	-462.408	-661.939
50.5	-2363.41	-1997.16	-2346.76	-1942.2	-1727.39	-1798.8	-1711.04	-880.755	-1586.73	-1160.37	-364.776	-530.939
51	-2211.18	-2192.59	-2428.43	-1855.94	-1703.63	-2163.86	-1679.61	-1017	-1630.31	-866.082	-553.163	-595.837
51.5	-2164.37	-2178.04	-2535.59	-1976.9	-1671.1	-1961.22	-1908.53	-1195.67	-1823.84	-644.286	-413.98	-643.775
52	-2064.98	-2093.86	-2440.74	-1814.04	-1689.53	-1948.55	-2167.86	-1348.76	-1923.31	-893.204	-439.102	-508.429
52.5	-2186.94	-2132.96	-2350.12	-1932.98	-1860.37	-1784.88	-2179.61	-1464.67	-1956.57	-641.735	-111.225	-465.776
53	-2148.14	-1830.65	-2087.22	-1717.27	-1844.49	-1707.47	-2137.9	-1528.35	-1921.73	-621.122	-186.347	-259.245
53.5	-1737.61	-1770.8	-1946.12	-1636.65	-1761.67	-1579.9	-1910.06	-1486.47	-1778.72	-471.49	-260.857	-336.959
54	-1435.8	-1694.43	-1761.78	-1645.63	-1538	-1385.41	-1974.02	-1594.59	-1808.32	-254.327	40.1429	653.02
54.5	-1498.1	-1517.88	-1532.35	-1481.33	-1531.96	-1228.71	-1950.47	-1580.08	-1728.48	-56.551	100.939	-68.2857
55	-1191.92	-1559.49	-1294.55	-1223.43	-1320.61	-706.735	-1897.59	-1703.04	-1717.23	122.123	359.122	171.102
55.5	-689.878	-1328.1	-956.796	-944.082	-1251.71	-799.163	-1707.96	-1352.96	-1485.36	279.143	169.571	-61.0408
56	-651.633	-1041.43	-799.837	-775.551	-933.796	-686.796	-1461	-1469	-1303.36	469.469	363.041	259.592
56.5	-429.02	-560.061	-502.265	-479.306	-650.02	-310.755	-1359.9	-1486.02	-1198.66	687.122	340.816	279.449
57	-106.184	-299.347	-102.123	-307.939	-509.163	-141.877	-1405.06	-1042.53	-939.229	937.041	439.286	359.714
57.5	320.857	-216.98	151.184	179.429	-143.388	57.5918	-799.143	-1138.98	-725.186	864.714	468.408	566.061
58	239.571	30.6531	826.775	380.286	-138.98	316.469	-406.653	-874.51	-411.316	865.633	655.225	597.571
58.5	555.816	233.633	980.959	690.286	287.776	506.367	-106.449	-759.653	-167.435	1045.94	436.245	770.49
59	888.143	575.143	1041.29	908.653	388.265	851.775	220.102	-441.531	138.641	995.041	630.061	779.531
59.5	1195.57	775.041	1400.67	979.898	569.408	1000.67	386.224	-245.673	306.892	1164.41	856.122	689.429
60	1443	980.633	1866.63	1071.73	770.673	1263.69	482.184	-226.082	411.956	1268.49	811.633	827.714
60.5	1479.24	1291.67	1818.55	1037.43	957.51	1694.02	1068.24	17.3265	761.455	1217.9	697.959	836.837
61	1832.53	1490.67	2193.9	1281.1	1237.8	1329.59	1164.84	243.816	902.672	1340.37	572.225	792.204
61.5	1558.76	1714	2308.29	1429.63	1631.92	1981.88	1278.96	400.061	1054.54	1397.35	740.143	669.551
62	1847.14	1823.41	2129.61	1457.98	1479.35	1785.88	1502.02	481.224	1182.73	1502.9	810	661.327
62.5	1457.67	1634.49	2440.86	1322.47	1621.04	1966.06	1635.49	909.429	1436.63	1220.55	1079.61	717.837
63	1498.55	1640.45	2277.69	1724.22	1488.88	1816.71	1815.04	1017.92	1544.76	825.98	891.184	837.429
63.5	1479.67	1664.14	2318.18	1570.59	1577.1	1850.14	1886.67	1081.88	1570.08	1124.02	723.98	746.633
64	1712.39	1428.1	2234.35	1611.2	1569.63	1818.45	2098.29	1257.92	1705.13	1096.22	915.939	774.163
64.5	1209.24	1575.27	2066.53	1513.29	1711.14	1688.41	2011.94	1325.18	1671.73	903.551	916.082	869.49
65	1455.59	1452.29	1807.67	1413.49	1510.82	1400.04	1935.59	1197.35	1625.64	1037.8	842	391.837
65.5	1250.76	1461.94	1431.73	1193.55	1498.24	1326.14	1835.2	1295.78	1589.2	719.449	846.061	657.633
66	1026.63	1655.88	1265.53	1078.51	1175.9	1263.92	1578.96	1198.12	1447.42	750.469	631.816	154.123
66.5	1224.27	1483.18	1158.37	924.306	283.694	1336.18	1761.8	1409.18	1555.33	543.388	531.429	439.02
67	1028.29	1570.65	1007.33	891.735	-54.3265	1082.61	2022.8	1239.94	1544.67	229.02	358.469	327.327
67.5	795.204	1133.88	729.163	743.898	42.5306	949.694	1786.14	1099.2	1317.2	301.551	531.408	213.245
68	580.327	972.816	568.367	686.449	714.612	782.449	1471.16	1184.84	1163.01	25.6122	559.429	180.531
68.5	566	651.184	186.408	433.143	1083.49	673.571	1110.69	884.163	881.649	13.102	296.367	144.816
69	301.551	633.041	120.123	244.367	1050.43	409.878	892.245	784.653	710.069	-60.6326	15.449	17.8571
69.5	204.041	334.959	-792.102	189.429	667.857	273.939	630.306	834.796	586.019	-69.449	-57.2245	29.6735
70	-116.225	178.49	-1391.27	13.5918	436.347	110.694	479.469	742.694	448.494	179.02	-68.102	17.2449
70.5	-339.184	-156.082	-1332.29	-89.2041	327.469	48.0408	146.449	804.286	304.853	-344.857	-39.3674	-121.694
71	-465.388	-264.755	-600.163	-307.653	196.837	-259.408	106.286	321.857	51.6281	-127.347	57.6939	85.4694
71.5	-659.51	-477.653	-355.327	-163.123	-323.612	-401.776	-228.102	290.163	-102.825	-483.837	-309.061	-172.388
72	-729.612	-448.592	-753.796	-297.551	-163.306	-1111.37	-331.061	67.3469	-270.557	-648.51	-203.041	-373.143
72.5	-773.143	-661.959	-982.449	-422.571	-599.225	-1165.31	-299.143	41.0204	-290.918	-523.367	-313.878	-411.061
73	-778.347	-751.245	-1034	-661.49	-324.633	-1001.47	-573.245	-59.1429	-463.067	-676.388	-309.082	154.163
73.5	-867.939	-956.531	-1169.98	-556.163	-682.571	-771.367	-749.02	-248.265	-620.191	-846.551	-266.918	-613.49
74	-866.633	-895.51	-1125.41	-637.306	-559.49	-704.653	-956.02	-338.449	-721.1	-796.122	-617.163	-355.571
74.5	-1116.08	-898.49	-1164.08	-574.204	-721.286	-1485.39	-1014.22	-285.571	-735.102	-888.367	-451.98	-480.857
75	-1126.08	-856.857	-1085.18	-720.143	-868.551	-1420.33	-964.49	-618.082	-879.904	-777.612	-501.571	-446.816
75.5	-1039.98	-919.306	-1188.9	-578.898	-772.245	-1326.49	-1032.88	-497.388	-858.574	-835.878	-665.939	-484.184
76	-985.918	-987.816	-1026.53	-785.02	-906.735	-870.061	-1162.27	-758.939	-955.803	-792.082	-755.408	-349.347
76.5	-796.163	-905.633	-1277.82	-720.571	-839.184	-890.939	-1079.86	-950.878	-1042.14	-830.959	-663.898	-551.612
77	-716.633	-1014.78	-1103.53	-677.571	-934.51	-811.837	-1052.37	-853.286	-972.073	-762.735	-594.245	-460.245
77.5	-727.49	-778.694	-1016.61	-536.612	-785.184	-822.775	-1266.9	-682.694	-992.952	-695.347	-508.082	-685.245
78	-903.49	-869.143	-755.694	-632.816	-731.98	-792.49	-1265.37	-882.857	-1088.81	-807.796	-647.204	-509.837
78.5	-561.816	-1088.33	-1015.37	-670.245	-747.775	-734.878	-1117.37	-835.327	-967.304	-729.449	-431.347	-647.959
79	-597.816	-805.143	-630.143	-579.143	-719.633	-833.755	-977.49	-959.184	-937.883	-670.102	-728.898	-622.408
79.5	-438.571	-760.49	-529.061	-536.612	-684.225	-750.469	-1144.29	-976.796	-972.209	-647.51	-620.816	-732.592
80	-346.551	-698.163	-504.959	-265.98	-704.306	-594.531	-1052.16	-918.898	-884.392	-674.878	-518.837	-517.469
80.5	-245.939	-467.714	-391.878	-342.673	-762.653	-364.959	-1000.94	-887.122	-853.721	-530.735	-860.673	-524.02
81	-115.123	-495.02	-285.388	-264.531	-567.531	-309.265	-935.469	-893.163	-786.309	-221.653	-405.755	-430.204
81.5	-92.9184	-372.776	-384.184	-177	-512.102	-389.939	-804.939	-908.204	-744.228	-190.367	-693.408	-281.694
82	-124.837	-267.102	-207.755	-224.775	-614.469	-291.857	-744.265	-975.102	-718.16	-15.6735	-641.367	-341.939
82.5	-32.5102	-204.898	-226.123	-116.51	-670.735	-28.0612	-735	-875.102	-648.364	-116.408	-469.735	-474.653
83	-11.2041	-203.796	-26.7755	-57.1837	-679.898	-167.735	-533.592	-778.143	-518.381	-240.061	-549.51	-498.612
83.5	156.796	-213.592	187.184	-859.204	-180.816	57.2653	-594.612	-379.633	-359.197	-282.939	-305.224	-429.694
84	-726.735	-1051.57	-22.5102	-876.265	-294.224	-95	-461.592	-701.878	-433.777	-158.265	-66.7143	-330.041
84.5	-768.367	-779.49	48.102	-792.286	-39.102	84.1633	-521.429	-503.612	-352.715	-453.408	-364.02	-291.204
85	-615.939	-626.857	177.041	-622.653	-94.8571	182.49	-289.898	-599.816	-293.739	-211.857	-169.184	-208.367
85.5	-650.02	298.122	209.225	-485.898	43.4898	41.4082	-84.5306	-516.286	-170.491	-245.408	-220.245	-103.775
86	-391.531	292.163	373.02	-548.878	25.9184	324.796	66.3469	-296.653	-47.729	-194.102	-36.0408	-184.571
86.5	-229.367	46.0612	284.837	-236.877	6.95918	208.837	-123.225	-360.673	-128.365	17.3673	-65.9796	-198.816
87	21.3265	161.306	252.714	75.7347	-90.2041	379.286	127.98	-341.429	-8.71883	85.7347	-226.061	-39.6735
87.5	227.327	306.98	100.653	171.225	172.327	266.102	138.388	-291.633	32.0635	46.3469	-166.653	70.1225
88	235.204	79.0204	-35.7755	277.082	234.306	305.347	179.02	182.816	180.315	195.735	-176.408	-64.3674
88.5	259.571	379.306	335.306	382.551	151.388	443.061	368.388	-111.449	170.734	247.959	14.5918	138.898
89	187.061	36.2245	546.98	347.816	362.082	367.327	444.878	18.449	280.663	194.286	57.0204	114.388
89.5	388.204	223.041	570.755	343.714	447.082	510.653	389.347	229.775	359.836	311.163	95.7959	303.755
90	417.49	435.184	505.347	420.224	221.082	424.306	489.449	173.408	359.896	368.082	204.775	105.571
90.5	423.755	491	685.653	355.122	269.163	478.061	455.918	232.102	373.612	341.51	321.857	171.653
91	336.163	310.898	2.77551	305.653	183.98	312.265	456.469	360.571	397.401	456.388	177.98	254.673
91.5	395.49	246.327	413.245	187.449	440.571	466.633	416.816	414.531	422.587	-42.1633	241	317.449
92	537.225	384.592	439.469	205.939	285.184	218.816	279.163	389.735	336.671	-99.7347	142.816	-26.0204
92.5	306.592	327.327	287.796	339.959	302.041	337.082	448.857	275.776	359.625	57.3469	137.673	356.714
93	249	256.673	236.51	359.694	556.408	348.857	313.265	301.388	337.666	-279.143	231.429	336.469
93.5	370.571	327.082	287.469	166.592	-121.347	319.408	280.939	537.816	377.506	-93.0408	197.327	357.02
94	432.939	269.755	-395.571	290.816	-163.449	254.633	450.633	610.122	446.721	191.653	189.041	193.286
94.5	342.694	251.633	-326.265	361.347	-260.898	-128.653	256.102	651.429	391.978	42.3061	154.061	236.49
95	123.306	425.102	-175.123	112.163	-238.163	240.449	336.408	352.98	314.078	21.6939	64	137.469
95.5	155.51	810.775	-222.49	101.694	-205.245	-634.388	294.918	265.347	252.015	209.388	-28.102	127.204
96	126.265	165.98	45.1837	205.163	127.714	-662.163	171.592	457.51	208.192	-119.367	-149.388	246.694
96.5	115.735	-49.2653	95.5306	-72.3061	395.776	-372.082	79.6939	332.531	141.455	10.3878	-85.3469	8.2449
97	-131.327	112.204	-77.1225	-32.5102	392.898	-437.633	105.51	361.837	129.686	-136.918	-192.714	247.775
97.5	-14.7755	62.5102	82.8571	-222.061	455.306	30.449	-3.10204	298.878	80.2177	-170.327	-81.5714	124.102
98	-190.449	42.5102	-170.429	-320.388	233.694	84.2857	-92.9388	222.265	11.6973	-179.49	-280.592	-4.08163
98.5	-19.5918	-46.6326	-204.102	-105.102	-90	10.6122	83.7347	145.082	42.8707	-174.755	-64.1225	-80.0204
99	-239.469	-41.3674	-75.3674	-156.653	29.4898	-114.286	-4.44898	14	-30.4751	241.775	-69.6735	105.225
99.5	-145.51	-88.9388	-174.306	-122.469	-35.7143	-27.3673	-51.449	62.6939	-31.712	165.265	-40.9796	-4.61224
100	-269.041	-176.673	-100.102	-22.7755	-79.449	-59.2041	-217.775	18.1225	-122.341	95.9184	55.0612	60.449
100.5	-106.265	-34.4694	-209.612	-327.918	-89.7347	-515.694	-323.306	-128.02	-196.782	-24.2653	-58.0612	-150.429
101	-190	-87.7551	-179.673	-320.449	-120.837	-517.531	-190.327	30.8571	-122.527	55.7347	-121.225	-75.1633
101.5	-254.163	-71.5306	-225.612	-373.163	-95.1429	142.571	-245.673	-18.5918	-174.945	127.143	-1.69388	-184.592
102	-234.857	-109.326	-241.98	-326.102	-0.285714	-514.286	-230.204	-75.9592	-170.931	80.4694	-1.7551	-176.449
102.5	-417.347	-43.0408	-267.939	-443.061	-161.143	5.38776	-225.51	-102.123	-188.256	82.1225	-70.5918	-212
103	-378.449	-76.9184	-221.225	-271.143	-123.877	-46.6531	-299.224	-72.8775	-222.042	35.449	34.0612	-239.98
103.5	-324.265	-120.408	-166.429	-343.245	-75.5918	-101.143	-223.347	-88.8367	-216.054	69.9592	-124.531	-198.02
104	-285.796	-177.775	-55.898	-145.592	-116.674	-96.4898	-129.531	-227.225	-211.472	82.1633	-63.5714	-238.469
104.5	-268.531	52.9184	-229.612	-147.714	-226.714	-141.286	-382.204	-314.796	-320.526	-138.082	-124.674	-77.9592
105	-264.327	-135.857	-179.49	-109.429	-157.388	-162.531	-238.388	-276.714	-256.667	-65.6735	12.9796	-163.265
105.5	-142.02	-698.286	-171.612	-27.8775	-141.51	-73.1429	-350.898	-332.306	-287.707	-191.673	-178.898	-87.6122
106	-149.082	-722.408	-304.939	-193.449	-283.673	36.2245	-335.061	-187.265	-234.757	-193.571	187.755	197
106.5	-185.918	-663.082	-90.2245	-146.429	-180.959	-61.551	-264.102	-292.367	-258.776	43.3061	-7.14286	-182.612
107	-210.469	-612.959	-176.694	-175.857	-253.327	-150.225	-397.02	-336.265	-325.102	6.73469	-63.898	-281.429
107.5	-203.898	-640.775	-167.857	9.10204	-278.612	-72.1429	-245.673	-275.51	-242.153	-23.3265	-131.286	-226.653
108	5.89796	-527.51	-90.0816	13.6939	-272.449	-0.734694	-254.714	-289.837	-251.968	20.102	29.449	-122.449
108.5	-348.469	-185.367	-70.0204	-132.51	-218.673	48.6326	-229.714	-375.918	-274.908	-110.143	17.9388	204.204
109	-187.388	-171.184	-405.184	147.306	-470.551	-108.469	-166.98	-356.122	-220.222	-675.245	-298.02	-461.694
109.5	-86.9388	-71.8571	-321	210.041	-297.163	-63.7347	-243.204	-356.755	-235.138	-658.388	28.3469	-379.327
110	-126.857	-77.4694	202.082	260.082	-505.571	-147.898	-60.102	-161.306	-104.583	-393.02	-150.939	-80.449
110.5	-115.612	-185.939	-72.7551	134	-36.9592	-42.898	-160.204	-368.245	-215.369	-561.49	-179.837	-285.612
111	-81.6939	-122.816	-196.98	124.694	-35.6735	-109.959	-228.469	-306.898	-215.99	-366.102	-186.898	-288.837
111.5	109.102	73.1837	-450.959	182.286	32.1225	23.3673	-10.7143	-247.775	-76.5635	-252.714	-98.4694	7.55102
112	82.8163	-232.653	-186.082	40.3265	162.796	-148.367	-155.123	-100.531	-104.822	-214.837	67.1225	-89.0612
112.5	-137.755	15.9592	242.061	221.388	93.2653	-31.8163	-128.347	-54.5102	-93.6916	-33.898	-53	11.6531
113	99	86.8163	182.714	275.918	46.0408	-6.93878	206.102	-25.4694	54.3061	39.6326	169.265	-57.4286
113.5	32.0816	247.898	134.163	180.041	-85.2857	-9.38776	131.449	-32.1225	41.9297	-45.3469	59.5714	85.6939
114	93.3061	83.2653	217.653	213.531	32.3061	32.9184	14.5714	18.5714	31.3254	-126.816	65.7959	-67.9184
114.5	142.061	183.531	122.592	-73.3469	27.8571	42.9184	89.7143	-63.2041	19.1587	47.7347	98.9388	-100.123
115	110.837	146.49	154.245	35.3878	202.98	-69.6531	13.4082	700.429	276.294	-120.102	28.8163	14
115.5	231.429	-4.44898	42.2245	18.2653	57.9388	-122.633	15.6735	98.9592	73.102	-25.551	-18.0204	182.592
116	108.163	62.3265	204.857	-11.4898	274.694	114.49	107.531	216.367	173.282	66.3674	104.694	251
116.5	238.143	429.837	282.429	-67.7959	14.7959	323.694	132.469	143.163	147.074	70.9592	96.4082	-54.6326
117	88.7959	144.429	70.6326	27.5102	104.041	-234.367	112.877	277.857	186.397	130.204	186.694	15.6326
117.5	200	140.184	60.2245	-75.2653	26.5102	-269.612	176.347	423.163	267.113	140.469	107.184	32.8163
118	220	-38.0204	103.735	-77.0408	175.306	-264.061	258.204	223.204	217.15	146.225	-166.796	95.7347
118.5	252.265	183.123	86.2041	50.7347	-23.8163	-85.449	158.837	199.98	175.898	18.4898	-243.633	-11.3061
119	-19.5306	86.7551	98.8775	-167.755	18.8571	51.102	91.7347	224.49	143.931	-32.449	-191.306	24.449
119.5	220.204	116.061	19.6939	-65.9388	224.143	120.123	43.5918	179.02	95.3719	100.265	-211.653	270.776
120	167.939	-31.9184	47.6326	-111.531	177.633	98.3265	-45.3469	-157.225	-55.0692	98.2857	-175.898	-169.551
120.5	81.6735	-117.837	130.286	-6.14286	121.367	105.102	107.918	-434.898	-113.373	-114.877	-244.388	-136.265
121	-12.4082	-48.6735	-167.388	64.7347	64.0408	161.061	107.918	-320.796	-56.8186	78.5714	-121.877	-104.959
121.5	-235.673	-149.469	-243.918	-120.653	-80.0408	35.4082	19.9796	-288.776	-77.4331	-9.20408	-117.571	-7.65306
122	-153.204	35.6326	85	-114.429	-45.9388	-59.4286	70.3878	-128.184	-13.9456	35.2245	116.571	10.9184
122.5	102.082	80.7347	14.2449	4.2449	44.0408	15.4898	-27.9388	-244.245	-61.9773	84.5918	-65.3878	-34.1225
123	131.469	-18.8367	-74.4898	-56.8775	-78.3265	24.7347	36.7551	-108.939	-29.0216	-45.6531	42.1837	308.878
123.5	100.021	-180.854	-37.5	40.5	195.812	-95.5417	264.521	-202.625	-0.517278	-58.7083	234.688	94.7083
124	-8.42553	183.936	74.7872	-2.78723	27.3192	68.7872	154.66	-33.5745	18.9717	51.0425	-54.0425	-32.5532
124.5	13.587	-10.9348	11.3913	32.9783	-66.3913	239.304	-48.4348	-82.7609	-53.7445	-151.826	214.652	-252.065
125	-109.222	0.377778	67.2445	-9.24445	-253.6	281.267	30.8222	89.7555	21.7274	62.8444	117.733	-97.7111
125.5	-76.9091	-87.8636	91.9773	11.0682	-98.9773	123	5.54545	21.7954	-24.0465	-53.9773	-4.18182	-56.0455
126	-66.1163	100.535	-75.2326	-20.4651	52.5349	85.8605	-10.3256	83.4651	11.4933	-182.953	-138.488	49.7442
126.5	57.1429	-148.833	-180.357	-60.8809	176.714	-41.4048	-68.8809	126.167	0.96833	28.7619	-0.714286	10.9286
127	-141.268	-234.878	-65.6342	163.049	68.8049	43.7561	-15.6585	56.8049	8.11863	21.3902	76.8781	131.195
127.5	-158.25	-149.925	90.025	68.9	6.325	-15.9	-44.275	-94.65	-45.9612	-79.325	-47.15	-86.775
128	-20.9744	-58.8974	2.07692	63.5385	50.359	44.9487	27.1795	121.154	15.9897	2	-103.436	-49.4615
128.5	-57.5526	-27.2895	-142.526	129.658	-261.842	-120.105	-48.9211	-1.89474	-53.1843	-135.5	-55.5526	-50.1579
129	-181.405	94.2162	-13.8649	83.4324	-298.838	-8.40541	-94.2703	45.3243	-46.0908	-111.081	-57.7838	-98.7838
129.5	-118.056	-72.75	50.3889	-82.0556	88.5556	-101.694	-69.9167	45.5278	-45.1474	-106.083	63.6389	-55.6667
130	9.65714	-17.7714	-148.457	-17.3429	-179.029	-36.3429	-164.571	100.343	-40.7144	-20.8	-18.9143	-233.086
130.5	-113.647	61.4118	-243.941	-124.706	-81.2647	-61.2647	-95.5	-0.911765	-93.8112	135.794	22.7353	-66.7941
131	-53.5758	-63.4545	-38.7576	73.8182	21.8485	-81.303	-198.909	-11.4848	-118.706	-33.2121	-110.333	-64.8485
131.5	27.5625	182.25	-34	155.875	-85.6562	-299.25	-245.125	-71.8438	-153.779	-174	-61.2812	-112.844
132	36.5806	-44.5161	109.484	-383.742	-115.419	-241.968	-120.645	-82.129	-101.866	-38.871	37.7419	19.1613
132.5	-96.4667	-63.6333	2.13333	-341.1	-167.167	-95.2667	-159.967	-53.1667	-92.7412	-54.8	-104.367	67.1333
133	-71.1034	105.517	-112.172	-324.138	-18.3793	0.827586	-33.0345	-174	-76.8434	152.897	-138.31	-26.069
133.5	42.3929	6.07143	15.2143	-275.607	-2.17857	-121.857	-77.6786	-40.6786	-88.8311	-24.7857	-118.571	22.2857
134	-104.111	-108.074	-41.2963	-253.889	-201.741	-117.778	-84.1852	-7.77778	-48.2024	-34.2222	-239.852	-25.7407
134.5	-196.962	-124.5	-126.538	-282.423	-179.038	-107.269	-17.5	-100.231	-87.859	-71.6539	-221.654	-103.846
135	11.04	-109	-62.52	-25.8	-192.48	-274.88	-176.4	-307.64	-190.674	174.12	-139.44	-31.76
C
Phase	Phase shift (h)
-19.62		-0.74	0.86
74.34	-3.74	-3.64	-3.24
152.64	5.46	2.36	3.76
246.6	1.56	3.36	2.66
340.38	0.76	-0.74	0.86
434.34	-3.74	-3.64	-3.24
D								D inset
Time after sync	Adn at 68hr			Adn at 83hr				68 h	83 h
5.994	20.7182	8.04477	-11.3484	8.95924	10.1957	-3.77401		3.83	-4.185
6.327	33.1209	8.77692	17.1153	15.7258	-1.86213	-2.57453		3.85	-4.685
6.66	28.2781	29.3764	22.5356	20.5006	24.4032	23.0496		3.83	-4.69
6.993	48.9864	41.3623	45.0206	38.4952	20.2572	34.7631
7.326	45.313	58.1884	39.8288	37.5972	42.7478	36.6711
7.659	51.7127	65.2205	44.7718	23.1764	53.9818	47.3272
7.992	54.094	68.7186	67.4376	49.3789	57.2303	53.998
8.325	60.3697	66.5209	68.2633	54.3407	64.3229	67.0221
8.658	65.0407	95.5422	68.5413	65.9822	76.1612	65.28
8.991	57.6273	76.2333	66.7431	70.9626	66.4438	84.9171
9.324	69.1852	89.9499	67.0674	59.3356	73.7084	70.5444
9.657	62.9481	82.5234	82.7598	68.5319	70.1419	77.5201
9.99	62.1707	93.5474	71.404	65.6107	86.9396	77.8812
10.323	57.381	77.7475	73.8934	59.4606	92.5473	79.4602
10.656	59.9489	82.7709	74.8204	56.5628	78.9831	80.6232
10.989	59.7931	81.4267	73.7459	59.557	68.2394	74.361
11.322	44.7746	68.1388	62.187	73.2533	85.782	91.2331
11.655	48.6001	86.7511	65.4168	71.7194	65.6115	71.051
11.988	43.3829	69.5041	74.9953	49.6514	74.7013	76.8286
12.321	37.7889	70.975	64.4548	55.7667	73.9789	118.778
12.654	33.3916	63.7171	67.5057	66.6787	60.3064	74.5227
12.987	35.9203	66.0691	57.9148	43.9141	65.7228	64.6135
13.32	40.6558	71.9372	59.9123	52.806	83.9287	74.3775
13.653	24.8947	54.9614	35.8311	41.26	52.8989	62.2598
13.986	35.2981	29.5842	54.4049	49.5703	59.4641	59.3262
14.319	13.3622	59.5697	49.5676	26.5153	56.7984	52.2072
14.652	26.6515	45.9657	50.5208	22.4724	54.2507	52.9431
14.985	15.2822	20.4812	34.4188	9.06779	47.7964	55.5169
15.318	18.0355	31.4482	31.4104	26.8381	31.4491	30.6339
15.651	15.4004	16.6241	24.736	15.6168	38.6294	35.6119
15.984	6.35602	3.54235	43.1097	21.6328	26.4296	25.4538
16.317	-3.23032	26.7786	22.0026	11.3151	15.1091	19.418
16.65	-10.2925	-0.678168	23.9776	22.7809	35.4397	31.0136
16.983	-7.28669	11.0085	12.4225	-2.75325	1.27247	20.0988
17.316	-10.655	0.430168	15.4671	11.7552	16.212	16.5664
17.649	-17.9579	-5.57234	2.30054	-0.823361	21.549	31.065
17.982	-7.94051	-8.8252	11.2015	-6.61845	13.0105	11.9734
18.315	-30.1442	-13.7599	-9.81991	18.0598	-10.2375	-10.1824
18.648	-27.638	-13.6554	-17.4727	-14.3389	-3.5198	-6.84931
18.981	-14.1811	-14.6338	-10.9598	-18.1022	-11.0906	-1.51686
19.314	-24.9254	-24.5836	-20.7301	-34.1889	-17.3627	-12.8311
19.647	-29.9359	-37.8971	-28.6778	-17.9985	-13.6039	-20.1656
19.98	-30.9297	-23.9613	-22.1469	-35.2873	-16.1642	-22.0765
20.313	-28.5958	-38.6583	-23.0009	-29.5265	-9.63323	-40.7144
20.646	-48.8227	-44.5562	-30.2993	-36.5841	-9.75408	-35.7427
20.979	-43.7373	-48.8669	-24.1651	-36.6382	-33.0174	-43.6724
21.312	-28.8636	-44.0773	-34.0779	-32.1372	-20.3613	-28.7942
21.645	-37.1017	-48.3591	-45.3894	-51.8438	-44.1206	-43.5903
21.978	-46.9225	-41.6947	-51.3081	-44.2595	-37.7916	-42.1285
22.311	-48.6026	-62.7296	-49.4603	-45.2632	-38.4229	-36.0376
22.644	-49.2114	-43.1295	-33.5738	-48.434	-46.9379	-53.3859
22.977	-53.7782	-59.1611	-32.5475	-43.088	-56.3475	-46.2714
23.31	-28.7166	-63.5827	-46.018	-47.3175	-42.3612	-39.9677
23.643	-54.8658	-68.1803	-55.36	-56.7767	-48.6423	-46.0586
23.976	-74.3477	-66.6138	-44.6202	-53.9008	-62.0064	-58.2737
24.309	-57.3313	-58.0393	-59.0015	-39.6557	-52.6383	-59.2234
24.642	-48.6613	-58.63	-58.2386	-57.7218	-67.1945	-49.4567
24.975	-46.6412	-58.1484	-43.3405	-57.4044	-66.7671	-43.9745
25.308	-39.965	-52.8412	-54.0442	-54.0199	-60.3137	-60.5139
25.641	-37.8809	-53.44	-64.3303	-41.2456	-57.6668	-52.4796
25.974	-41.9211	-53.7349	-61.5059	-60.3786	-72.6857	-55.2815
26.307	-50.372	-62.8	-56.2618	-61.0099	-51.7446	-52.1215
26.64	-38.0793	-40.5539	-48.4096	-48.7262	-60.1513	-59.1196
26.973	-31.3842	-44.0412	-49.6947	-39.6349	-49.8201	-50.482
27.306	-37.4661	-38.5564	-53.4265	-43.8573	-56.6559	-49.683
27.639	-36.7708	-36.3424	-49.3133	-49.2529	-62.5015	-48.0038
27.972	-32.1426	-10.0228	-33.7948	-39.0352	-47.5592	-55.3699
28.305	-28.1737	-33.8813	-30.7529	-38.2957	-52.6103	-43.1547
28.638	-14.5184	-42.9185	-19.6993	-25.6108	-35.9573	-45.4436
28.971	-10.6929	-32.9597	-42.3548	-30.8801	-41.4215	-44.2946
29.304	-6.46604	-29.4859	-13.6707	-31.1524	-32.2292	-37.9954
29.637	-9.40778	-23.8901	-31.1479	-19.4549	-37.3416	-37.614
29.97	-0.955928	-12.0555	-24.4104	-27.62	-27.6416	-24.2319
30.303	-7.0919	-10.6027	-17.1715	-5.2576	-40.4673	-25.2401
30.636	-7.60955	5.94209	0.862139	1.28058	-10.6631	-1.21836
30.969	13.2639	4.0672	-9.69185	0.422051	-8.49513	-20.7094
31.302	7.17307	-2.56387	-14.779	-5.76623	-11.7164	-9.74415
31.635	16.1651	18.5252	-4.53885	9.85417	3.77411	-5.63998
31.968	21.1233	14.889	9.32661	16.331	-4.82293	-2.20314
32.301	19.2529	26.8318	-11.041	2.04983	12.0483	14.0639
32.634	27.7138	15.3291	22.3182	23.6881	14.0323	-5.89068
32.967	18.3908	17.9949	7.11806	8.1786	28.1764	15.4256
33.3	25.1175	10.4079	17.7803	20.2557	4.91221	17.3817
33.633	26.2528	12.0285	23.1127	25.1139	12.3107	34.6569
33.966	33.1978	21.1116	28.327	29.9467	31.3346	16.6864
34.299	22.7574	24.9795	30.1208	22.825	26.4882	19.3738
34.632	34.2006	39.717	25.2194	24.1192	25.1986	34.6109
34.965	35.5488	30.0711	43.299	32.2346	27.5325	36.2865
35.298	42.6344	54.1254	32.8451	50.2187	46.9785	44.9647
35.631	40.2509	47.1705	59.8249	59.3875	43.3874	42.9626
35.964	40.8587	51.0889	46.9424	30.2091	58.6236	36.3767
36.297	31.1542	53.8449	53.4256	41.444	50.2674	40.4475
36.63	50.2998	44.9322	45.2154	35.1737	49.9409	67.4714
36.963	43.2079	53.0729	28.5831	56.2221	55.4114	50.9194
37.296	44.6112	38.0153	50.9708	52.2406	57.0617	47.4077
37.629	41.3132	41.5107	21.5255	46.8224	59.2775	55.2463
37.962	38.8116	49.554	53.2461	42.4098	58.3738	60.4607
38.295	28.9484	34.4603	38.8648	54.2489	58.4144	55.056
38.628	38.8305	51.1088	40.6035	53.4048	64.9914	64.1392
38.961	27.7499	32.1895	31.1389	41.5937	49.8499	38.5185
39.294	25.7983	24.3013	49.3863	33.8047	37.5986	32.2734
39.627	18.6767	38.4049	50.3404	35.8843	45.1559	39.4086
39.96	21.4254	46.6664	37.2036	47.3392	38.7106	27.1907
40.293	6.76995	25.4133	43.7445	18.9923	29.6419	38.7088
40.626	14.9765	28.006	19.2069	10.5269	33.9436	29.2803
40.959	4.06811	16.3671	16.6277	19.932	20.4001	29.6662
41.292	20.3586	15.3724	24.2129	18.1248	30.5717	31.4049
41.625	10.8399	-2.39343	18.3394	27.7201	27.0888	21.9052
41.958	-7.41205	15.7268	19.2845	12.6597	12.0772	4.29356
42.291	-0.504117	-4.3639	-4.77423	7.15683	-1.6837	20.7923
42.624	3.04634	2.74333	6.95122	17.9056	9.05606	6.18016
42.957	-5.40099	-8.66828	4.25478	-4.115	4.09336	-5.68417
43.29	-14.1044	-4.88155	-5.40009	-4.36029	-5.42444	4.57853
43.623	-12.4108	-7.07477	-20.8645	-23.2877	-19.1384	2.24102
43.956	-17.1481	-4.64166	-1.69632	-13.6833	-2.7776	-5.76082
44.289	-1.34371	-19.2178	-15.532	-15.5131	-25.4556	-22.9432
44.622	-28.7329	-15.2949	-23.7061	-23.5781	-0.313833	-12.8933
44.955	-10.7903	5.23596	-19.4748	-30.0639	-19.6281	-23.8306
45.288	-15.4915	-21.3289	-13.907	-7.83049	-18.7434	-22.8791
45.621	-30.6808	-17.6333	-20.3568	-15.7755	-21.1837	-12.6841
45.954	-26.8039	-34.9816	-23.9983	-29.8231	-25.2338	-21.6031
46.287	-27.3891	-38.2642	-26.5973	-24.9037	-21.9512	-30.0459
46.62	-31.9794	-27.638	-22.4814	-11.5983	-38.6114	-18.7984
46.953	-21.8754	-21.429	-37.2875	-28.2792	-24.6756	-17.7496
47.286	-8.55285	-33.2654	-34.7471	-18.2934	-25.4701	-37.513
47.619	-18.1121	-42.7886	-23.2354	-8.5754	-22.0702	-25.6838
47.952	-22.3029	-24.3735	-25.4078	-25.3132	-48.2446	-39.0749
48.285	-14.9792	-34.5009	-30.247	-22.3353	-35.8924	-51.4334
48.618	-23.4374	-39.1416	-34.1492	-32.5349	-31.6611	-41.9238
48.951	-30.9225	-35.3143	-43.6363	-17.1273	-37.513	-37.8403
49.284	-23.8576	-28.1665	-28.0628	-24.9614	-41.7425	-23.4139
49.617	-14.7069	-27.39	-27.5451	-16.9001	-33.2771	-42.1654
49.95	-17.6179	-19.0816	-5.47043	-24.194	-43.4406	-35.0988
50.283	-17.0823	-21.8466	-19.9699	-22.8909	-30.9712	-41.0851
50.616	-15.1938	-26.7227	-33.6721	-14.9846	-49.7588	-28.3793
50.949	-19.2574	-22.155	-29.861	-22.8097	-24.6034	-14.8773
51.282	-0.999215	-9.08132	-21.6346	-18.1221	-28.0015	-22.3615
51.615	-18.4404	-13.2261	-21.576	-16.0704	-29.6861	-27.9708
51.948	-7.36966	-16.6521	-2.20314	-22.697	-32.0101	-21.4074
52.281	4.32332	-11.7101	-19.565	-13.2459	-17.6197	-12.1845
52.614	-12.0582	12.1349	-25.2852	-11.9247	-27.9465	-22.7881
52.947	-5.56873	-19.8039	-16.8748	3.87512	-20.2025	-15.4238
53.28	-1.8325	-12.7102	-7.72588	-4.15919	-12.6688	-17.0444
53.613	-1.13359	4.2133	-15.0081	-14.2045	-20.1719	-11.8093
53.946	4.58034	4.48565	3.20506	5.7996	-5.31442	-0.653819
54.279	17.4628	-0.155113	-0.137076	-16.9497	4.15919	-7.69793
54.612	11.7264	0.702517	3.98604	25.8849	-4.97804	-10.5558
54.945	18.0346	14.0981	12.9916	7.72859	13.0827	0.445499
55.278	14.706	12.9267	25.2095	13.1593	6.63378	13.5958
55.611	18.7019	10.3655	6.73569	15.8837	21.1765	26.5414
55.944	12.253	30.6916	6.51745	29.8403	13.1657	7.05944
56.277	21.9845	15.0775	12.896	1.49792	4.72283	7.82598
56.61	26.1128	26.8899	11.5473	5.42298	14.4165	15.6709
56.943	16.375	13.2296	8.23276	6.86124	17.1942	23.1219
57.276	11.5765	22.8568	-4.16209	23.0488	7.24984	7.23155
57.609	14.7913	26.0908	8.78502	17.7867	29.3139	6.95542
57.942	22.0119	16.1912	5.77408	26.0149	14.571	16.2287
58.275	17.7429	16.845	25.9463	6.13799	26.9421	11.5381
58.608	10.9429	18.6316	27.5163	11.667	31.1545	27.8884
58.941	11.2931	19.2122	43.7843	25.32	16.247	14.0608
59.274	17.6249	14.4521	10.8021	23.377	31.9097	36.0005
59.607	3.608	18.3418	17.4567	13.1318	33.711	11.2163
59.94	-1.95761	3.96734	24.3042	22.2021	16.845	14.3424
60.273	22.8641	9.82006	18.2073	0.553178	20.9193	23.3395
60.606	11.8179	0.639127	-1.43461	7.96577	23.8534	30.679
60.939	2.7028	-2.82715	12.6966	15.9452	38.7015	20.8534
61.272	-5.5391	6.81003	6.00084	-5.74117	16.9053	17.5664
61.605	-8.55918	18.542	11.251	-7.35773	14.1111	18.5145
61.938	-2.36084	-0.224929	2.49799	-6.6674	20.8663	29.7491
62.271	-17.4356	-2.05728	-1.98138	-9.45249	10.728	16.3832
62.604	-31.533	-8.47963	15.4926	5.65979	19.3841	0.94909
62.937	-21.1963	-9.75423	0.902458	-9.9124	12.8548	4.18221
63.27	-24.9342	-22.0796	-1.13196	-12.9919	-3.74881	6.36475
63.603	-27.0518	-28.6409	-13.2827	-25.8558	7.35773	6.96365
63.936	-41.5542	-25.5358	-20.8891	-20.4319	13.0203	-0.716846
64.269	-37.9562	-43.7505	-16.2378	-20.2198	-7.84599	-15.4085
64.602	-37.6518	-48.8507	-35.056	-37.2083	-0.764392	-8.50157
64.935	-52.9414	-36.2702	-31.4489	-36.347	-9.32357	-27.9222
65.268	-62.1772	-44.6913	-47.1399	-32.0633	-8.49791	2.8619
65.601	-66.8313	-44.5432	-43.3317	-32.0075	-16.2881	-16.0943
65.934	-55.4541	-54.7189	-33.8179	-40.0647	-9.61982	-16.4216
66.267	-70.5041	-64.2254	-51.6358	-34.6948	-16.642	-18.2759
66.6	-61.6954	-55.3709	-46.0189	-32.8762	-27.7888	-19.9556
66.933	-64.6094	-47.897	-51.4099	-25.053	-18.4606	-23.8232
67.266	-48.7373	-59.9097	-45.3496	-30.1551	-27.3837	-6.41778
67.599	-65.5521	-52.6799	-45.8918	-25.9555	-17.6231	-29.8808
67.932	-76.8415	-83.7768	-40.6188	-38.93	-33.4842	-34.7899
68.265	-53.5705	-73.5828	-72.4847	-41.9821	-34.5521	-22.6337
68.931	-3.46994	13.8852	-16.076	-38.1338	-30.9623	-23.2013
69.264	-11.07	-23.2746	-28.3776	-21.0391	-26.7067	-19.2102
69.597	-16.1034	-17.5801	-38.8331	-17.9019	-28.7347	-15.6801
69.93	-37.0849	-27.0902	-40.1681	-19.4653	-20.0207	-26.0213
70.263	-22.7461	-42.2802	-46.3609	-15.86	-34.0666	-30.7558
70.596	-27.6955	-33.849	-47.6401	-20.8096	-17.4	-29.0323
70.929	-27.3316	-32.5964	-50.8576	-15.147	-37.3043	-45.1521
71.262	-17.5375	-21.9186	-55.7057	-8.62688	-34.794	-41.4088
71.595	-25.1194	-42.4436	-41.661	-23.6238	-34.005	-35.2595
71.928	-19.6896	-23.4912	-46.031	-22.4657	-29.0786	-34.5909
72.261	-23.9752	-15.4549	-27.9094	-23.6228	-38.0615	-41.0899
72.594	-9.00518	-13.6617	-11.5115	-19.7934	-35.1019	-30.0327
72.927	-10.7938	-0.091795	-12.4832	-20.2923	-36.9174	-27.4782
73.26	7.58932	11.288	-7.17392	-17.7526	-26.3044	-17.1073
73.593	21.0832	8.33295	10.0594	6.19199	-16.1392	-24.7272
73.926	33.2418	9.58006	12.8291	-11.9658	-28.4333	-22.5463
74.259	29.8158	39.2298	15.4299	-8.17439	-18.2496	-9.01446
74.592	57.7752	33.6035	39.9345	-8.27638	-23.7165	-14.5379
74.925	62.1647	36.3629	44.9304	7.45023	-2.68153	-6.53506
75.258	69.958	71.9571	49.1474	7.95001	-16.932	-18.8755
75.591	65.2041	48.1488	69.2209	-0.999546	-7.64031	-9.10254
75.924	80.3883	67.2552	72.7981	13.4892	-7.59302	6.22722
76.257	76.2094	66.62	71.0521	0.196571	-6.89761	-5.82852
76.59	82.1213	83.1959	69.4462	8.13916	-1.82663	19.5959
76.923	92.7343	74.5116	73.3915	5.53459	12.3775	-8.00286
77.256	88.4348	69.8996	81.577	13.492	15.1378	7.71912
77.589	97.4603	79.6864	74.4708	17.556	15.1805	6.76223
77.922	84.6304	75.7318	81.8385	14.7929	16.232	4.81043
78.255	86.4514	78.7573	66.9621	21.6627	9.56986	28.6465
78.588	96.0982	82.6387	86.4523	9.53277	29.3818	6.64541
78.921	75.3488	87.3546	76.9733	0.788139	22.5612	16.3117
79.254	64.6803	71.5593	71.3145	0.0463611	15.9074	19.2538
79.587	72.9409	68.0859	79.64	5.79421	-1.60595	15.1128
79.92	62.2815	56.3992	73.64	0.247568	-2.34402	20.9923
80.253	50.1368	60.2333	74.2891	12.4211	17.1879	16.5435
80.586	43.8752	49.3959	66.6784	5.92773	2.20493	8.20962
80.919	56.7652	40.8822	77.4697	-6.63722	20.3021	-0.187441
81.252	37.3254	69.3174	52.0024	-0.117036	8.82434	-3.52571
81.585	33.6982	41.674	49.4615	1.46386	-6.62442	5.37909
81.918	43.9516	50.609	26.9832	-18.8044	3.49737	3.31724
82.251	40.0291	14.2958	37.7661	-5.0737	-12.2723	-13.6667
82.584	41.5112	35.5488	41.2324	-22.214	-18.8684	-1.66319
82.917	32.4684	28.853	40.5	-28.1353	-3.80824	3.72961
83.583	30.0292	22.0281	21.3368	39.7621	29.0176	28.6766
83.916	13.7792	14.6996	21.8553	7.33944	16.0943	12.9435
84.249	25.6638	23.1951	27.9158	-7.85513	3.93899	9.16356
84.582	2.70097	16.8267	5.27668	-10.792	0.510204	-9.79629
84.915	5.16605	-6.71128	-4.40623	-19.9501	14.1806	-12.0657
85.248	-22.9619	2.53913	-9.48998	0.149952	-8.40739	-7.43727
85.581	-13.6841	-0.812852	-19.5734	-32.4355	0.598895	-10.0422
85.914	-12.8374	-4.80579	-13.6073	-13.0916	-6.44978	0.00914344
86.247	-23.9631	-14.1577	-12.714	-19.7297	2.46873	8.80788
86.58	-7.1392	-0.0310877	-13.9803	-26.9914	-23.0351	-21.3316
86.913	-36.3315	-38.215	-24.8098	-4.92192	-17.4905	-6.36658
87.246	-30.3699	-12.1004	-23.0378	-23.5837	-9.58415	-17.0443
87.579	-36.8517	-42.4155	-21.21	-9.7716	-5.83169	12.9901
87.912	-34.9325	-31.3794	-36.3909	0.714103	3.08317	-2.53639
88.245	-40.0254	-34.8009	-36.4284	6.15536	10.0505	4.32942
88.578	-38.4518	-46.8839	-38.3942	4.43365	10.8789	11.8078
88.911	-40.7999	-44.7617	-27.0911	31.0978	24.4934	16.9364
89.244	-25.8924	-32.6896	-35.6329	35.3924	35.1748	30.6909
89.577	-37.6609	-26.7638	-41.4125	36.7	38.4683	21.9379
89.91	-38.109	-33.1925	-33.5016	50.6474	54.1173	27.8646
90.243	-29.9402	-21.1387	-34.4781	65.9471	49.1451	29.6741
90.576	-31.1837	-36.2281	-44.8257	57.0432	42.7447	40.1114
90.909	-24.3984	-40.6984	-49.2411	58.3873	45.2811	53.3986
91.242	-33.764	-26.5965	-42.3405	59.8978	39.7795	51.1384
91.575	-40.4131	-22.0339	-35.1538	67.3159	55.6497	59.0529
91.908	-28.9673	-36.1184	-48.6166	70.9028	48.7949	78.0594
92.241	-25.1079	-35.1885	-44.7773	77.2703	53.4535	55.5482
92.574	-42.7977	-18.382	-5.8198	83.1167	60.2361	60.2452
92.907	-36.7118	-24.7129	-31.8585	55.9231	54.8625	47.6556
93.24	-38.3421	-36.6158	-40.5658	53.6857	59.0566	31.0621
93.573	-35.0185	-33.4705	-27.5922	52.2356	43.361	52.274
93.906	-36.7859	-42.6926	-31.3995	45.7483	55.9487	55.6433
94.239	-34.7423	-29.3084	-41.2525	50.9281	32.8615	26.4566
94.572	-27.9689	-40.2065	-44.449	41.6776	42.9266	30.7841
94.905	-35.8743	-22.4609	-25.8339	26.3733	23.1421	36.6277
95.238	-30.594	-24.0143	-14.9633	30.8198	32.0377	36.4531
95.571	-34.7786	-17.672	-26.3151	38.1406	33.0607	41.5838
95.904	-31.3644	-19.9194	-36.9051	32.4222	26.8471	26.4197
96.237	-20.6336	-28.9159	-31.1615	32.9083	26.1618	31.634
96.57	-23.8757	-34.298	-39.8442	13.8709	12.1141	20.8329
96.903	-18.2375	-19.6714	-2.278	36.7076	23.1452	26.3782
97.236	-15.3291	-24.2616	-1.30133	36.3171	13.4678	12.7707
97.569	-16.3049	-9.3203	-14.1973	9.85057	40.3934	19.978
97.902	-15.3832	-16.8956	-9.31669	22.6014	19.1772	8.39414
98.235	-2.60896	-7.94502	-19.8436	19.84	1.86586	8.28501
98.568	-7.91256	5.59579	-2.87319	18.9544	9.31669	12.3351
98.901	-7.08198	-5.2071	-4.39456	13.9439	17.0281	8.083
99.234	-6.6419	-5.107	-1.02988	2.42319	12.1177	2.131
99.567	-2.63782	-5.51102	-0.0450909	4.07171	9.98855	18.3917
99.9	4.84277	-1.01184	3.60998	5.17915	-13.1963	17.2022
100.233	-0.380568	12.5587	17.1616	44.9151	-12.3477	1.27066
100.566	-4.86171	10.5368	12.6778	-17.8786	1.85414	-4.68405
100.899	-0.353513	9.87853	8.79183	2.14813	-5.24408	-1.1904
101.232	5.67424	1.21746	11.0752	-11.2159	-13.4777	-21.0295
101.565	17.7262	13.2982	10.526	-20.6507	3.64515	-6.66444
101.898	18.4485	3.66589	23.1542	-12.0952	-29.0241	-9.16429
102.231	11.8896	6.56254	2.84163	-17.278	-13.3	-0.0856728
102.564	23.7981	7.63841	37.32	-21.769	-12.6011	-20.3261
102.897	25.1878	15.7403	18.6821	-8.55916	-11.4892	-6.86645
103.23	25.9002	15.6132	47.7189	-24.8677	-4.44958	31.2751
103.563	10.0138	19.1231	26.6379	-15.1497	-25.0372	-26.2583
103.896	52.521	27.4333	43.0528	-17.8623	-18.811	-14.5463
104.229	20.1719	30.0486	28.5227	-24.6224	-39.0785	-24.4754
104.562	29.7267	38.6547	31.6151	-22.0387	-21.5787	-21.4407
104.895	27.5794	21.6518	26.8571	-28.5831	-19.8626	-27.7904
105.228	26.3079	29.8718	30.8341	-19.6894	-19.7174	-25.0579
105.561	28.8771	31.0974	17.5476	-19.4712	-22.6465	-31.634
105.894	12.5596	31.2336	33.5495	-36.015	-24.1561	-24.2084
106.227	32.5521	33.0183	15.294	-35.2296	-20.5534	-15.3417
106.56	24.5403	29.2956	20.3631	-26.4882	-31.4365	-10.94
106.893	30.1839	40.608	31.8017	-31.2056	-32.672	-52.8619
107.226	24.1588	34.8102	15.3571	-29.6121	-27.7959	-42.4622
107.559	20.9826	30.4625	15.1253	-44.5544	-21.301	-35.4
107.892	72.7452	31.6205	10.0309	-36.1386	-49.9878	-32.9849
108.225	23.1317	17.3438	25.2933	-33.3015	-26.683	-29.3713
108.558	13.3812	20.8356	26.9274	-23.7151	-31.5276	-29.1215
108.891	14.8791	4.45499	15.8422	-34.1375	-23.0108	-23.0721
109.224	28.9511	33.1599	15.0433	-36.5507	-42.6524	-33.0264
109.557	39.1011	19.4234	9.08402	-46.7368	-24.7685	-41.8552
109.89	5.42895	11.1898	3.51349	-37.6221	-31.0406	-26.1212
110.223	10.2645	11.3539	23.5402	-42.2078	-32.9741	-30.2209
110.556	15.8513	3.1753	1.06144	-39.4879	-42.3882	-35.0086
110.889	16.7549	6.37135	-5.77344	-36.8772	-32.4799	-39.1624
111.222	15.0162	-6.53368	10.4918	-18.426	-26.6118	-38.0054
111.555	-0.111825	7.71145	-7.02156	-31.2606	-23.3526	-30.2073
111.888	-16.4293	2.8263	-8.68091	-24.58	-33.3799	-26.9842
112.221	-10.6334	-14.7538	-16.6945	-26.0012	-33.857	-31.6268
112.554	-18.2726	-0.272349	-12.8031	-35.4018	-30.1568	-26.4991
112.887	-1.41946	-11.6253	-6.41554	-31.9379	-25.7983	-25.5053
113.22	-15.0225	-7.66906	-13.6797	-32.0966	-24.5683	-17.7162
113.553	-8.54112	-6.64821	-8.53571	-30.4977	-28.704	-25.3646
113.886	-15.9983	-16.7567	-11.3548	-30.1893	-13.4452	-18.2429
114.219	-19.4486	-20.9943	-16.5646	-31.983	-3.47741	-30.4833
114.552	-0.575361	-21.3713	-0.909936	33.9427	-21.7338	-16.6855
114.885	-13.5011	-16.9677	-7.51756	-12.9456	-10.0409	-1.32387
115.218	-6.26133	-3.27	-8.95687	14.761	-3.14915	2.99133
115.551	-15.5212	-15.3472	-20.0826	4.94738	18.4783	17.8172
115.884	-23.0424	-20.6002	3.24114	-2.77309	18.0643	1.95875
116.217	-21.0259	-8.73411	-19.6028	12.6697	8.45997	0.12896
116.55	-25.1445	-8.05325	-0.402211	9.66028	9.13723	6.10081
116.883	-10.5639	-10.7091	-13.6481	3.97883	9.37351	12.9411
117.216	-20.7004	-18.1031	-5.10069	7.52749	22.1739	14.2758
117.549	-14.7592	-5.30179	-8.53571	13.8059	9.30046	-0.888292
117.882	-36.1278	-19.4333	-9.99305	24.8406	28.7329	16.423
118.215	-21.8989	-4.85269	-26.4882	11.8806	13.7591	5.31081
118.548	-13.4064	-22.1874	5.42444	17.2852	24.0452	18.1753
118.881	10.3204	-20.2531	-30.5112	24.1408	11.5523	11.4035
119.214	-10.9733	-7.62668	-9.43573	28.4479	25.6883	21.6842
119.547	-26.4323	-23.4626	-19.4901	28.7202	16.6142	23.661
119.88	-17.8858	-28.7545	-11.7471	26.1573	18.8886	25.8543
120.213	-19.4017	-14.7574	-14.6681	37.0494	36.1548	18.2059
120.546	-16.2138	-18.8588	-28.5543	29.2739	13.208	27.6606
120.879	-19.1059	-25.0814	-26.6298	19.0022	32.0551	29.7808
121.212	-13.2946	-10.049	-14.1964	33.2474	21.7465	40.0849
121.545	-11.9103	-10.4855	-25.4133	23.0297	29.5824	39.5448
121.878	-3.69475	-12.5831	-13.7933	37.66	26.6451	40.176
122.211	-11.9464	-3.59826	6.41554	36.0935	29.0647	29.2541
122.544	-0.838692	-14.9783	4.47212	27.6155	23.2399	25.4493
122.877	-4.84728	-9.64135	-10.3556	33.8606	21.9413	34.8291
123.21	-2.91288	-3.28984	-6.68879	34.7101	35.519	26.2078
123.543	4.93024	-5.80952	2.5774	28.6237	23.3634	19.6588
123.876	-0.0658328	-8.04332	-0.268742	13.0484	24.3121	27.7887
124.209	-6.40652	1.27066	-8.56638	23.5519	28.217	18.1753
124.542	-1.56916	-4.40268	1.11555	15.3093	10.8877	18.4657
124.875	-1.23279	-3.9671	6.63017	26.0725	23.8089	19.9636
125.208	-2.8263	-6.91425	-9.61519	21.0034	3.35928	11.3755
125.541	-6.56975	2.22749	0.0757528	21.9791	0.904525	2.49263
125.874	4.31069	5.26933	4.47933	8.80085	3.6668	3.85438
126.207	5.76352	-0.512233	-5.2071	24.9957	14.8385	5.28015
126.54	13.3253	13.7347	3.70738	10.0769	8.66197	5.39829
126.873	21.1233	2.00023	15.5185	13.1323	-1.80995	8.91088
127.206	6.87186	14.2605	9.21659	0.363433	7.0414	10.8083
127.539	1.5376	2.63511	20.0249	11.4711	8.74764	1.23098
127.872	3.20867	-1.80364	-2.46467	11.3305	-3.83093	5.77976
128.205	27.1222	10.9616	-3.41789	7.71687	-5.43526	10.8624
128.538	10.012	8.71879	12.6498	-3.63884	-3.70918	11.1889
128.871	4.79768	20.8618	15.6736	-4.38374	-3.1735	-2.4313
129.204	19.4576	8.36076	15.2425	-4.0663	-2.14002	2.61528
129.537	7.44903	41.6929	19.6128	-8.26607	35.3504	-2.44483
129.87	14.1441	29.3641	11.197	-15.1289	-5.97906	-7.03509
130.203	18.0301	9.5196	10.0886	-20.4208	-14.7438	-6.70773
130.536	19.4766	20.373	-5.17554	-5.91052	-15.7611	-10.0742
130.869	9.50878	13.1197	13.2035	-12.8455	-7.95404	-24.442
131.202	15.4653	22.247	24.3338	-19.4901	-22.2596	-5.18275
131.535	16.2598	8.45636	7.18569	-17.0949	-15.284	-14.0657
131.868	4.79317	7.67989	14.3209	-22.6681	-16.3374	-28.208
132.201	17.4123	8.23812	8.97941	-21.7284	-25.3204	-33.8426
132.534	8.79724	2.85155	7.835	-16.4907	-17.3871	-20.1836
132.867	10.2248	16.763	13.2225	-17.4006	-27.1303	-18.2131
133.2	1.2878	0.676364	8.50325	-30.0784	-19.3233	-28.1043
133.533	2.23651	-4.42703	-5.77344	-34.7209	-13.4551	-20.116
133.866	-0.912641	6.84841	12.1511	-23.6114	-26.1455	-18.2366
134.199	4.68315	6.15401	8.82069	-38.3309	-39.5186	-28.8131
134.532	-0.258822	-1.60343	2.63692	-23.6231	-16.5231	-18.986
134.865	-1.24902	-19.5559	-1.67378	-28.8762	-19.9374	-24.9993
135.198	-1.46185	0.434677	1.18589	-21.5571	-33.9706	-12.639
135.531	2.9264	58.1042	-11.8012	-30.0477	-33.3348	-23.6051
135.864	2.54764	2.98592	-10.1401	-22.9017	-20.9357	-20.5272
136.197	-11.8472	-23.4879	-3.36379	-36.4109	-6.6455	-29.319
136.53	4.38374	-13.8961	-17.2184	-24.6269	-4.00768	-31.4437
136.863	-16.0307	-8.44824	2.41958	-18.7425	-26.6542	-18.2772
137.196	-2.46918	-13.4966	-3.09685	-22.0116	-8.15695	-6.68338
137.529	-8.35084	-22.715	-15.5798	-25.948	-18.4467	-25.3979
137.862	-2.90025	-14.0179	-14.0089	-4.67323	-9.49616	-7.2371
138.195	0.141586	-9.80457	-2.37088	-19.3657	-31.4771	-4.83555
138.528	-11.8607	-20.0132	-10.6956	-27.2999	-13.5291	-17.8434
138.861	-10.0445	-12.5876	-14.3552	-14.0612	-6.26223	-6.78168
139.194	-13.4064	-20.3261	-1.20934	-15.5392	-1.83971	-22.2109
139.527	-22.8846	-2.79654	2.65496	8.93883	-6.46153	-1.77568
139.86	-15.1596	-11.3746	-0.101004	-1.0885	-3.75968	-4.44056
140.193	-2.78031	-13.7924	2.78572	4.97714	11.9202	-5.5552
140.526	0.0865746	-16.7026	-4.15919	-0.303011	4.42613	-0.821557
140.859	-7.31556	-4.44146	-3.70557	0.872059	-3.41519	5.19899
141.192	12.3793	4.03293	-5.3541	13.9358	13.7257	9.85057
141.525	7.67357	-14.3227	-6.22616	11.234	18.2781	19.1105
141.858	8.21828	-2.89754	1.03168	15.1163	8.21016	22.8927
142.191	-4.91852	-1.71255	-0.488786	7.55905	20.1394	17.9877
142.524	0.261528	-3.28803	-2.67029	5.2071	21.2423	32.1039
142.857	15.7034	-6.11704	-4.84998	24.2896	17.2491	31.3499
143.19	-13.0971	11.0085	2.93001	10.2645	19.0112	35.0772
143.523	6.11253	4.90409	7.66997	37.3308	32.0326	19.7183
143.856	16.1029	4.44597	17.6603	33.168	27.9032	16.9262
144.189	6.00341	-2.61618	13.8059	40.8822	27.7264	32.4348
144.522	6.83849	7.76015	-2.23922	31.6583	21.5886	14.9008
144.855	7.31015	2.91738	-7.49502	30.9504	25.3077	8.24714
145.188	-17.3221	4.73545	1.56466	14.9594	26.8778	6.82587
145.521	-7.64021	-3.50717	-9.21208	19.3927	14.2532	19.1862
145.854	-0.509528	6.22075	-2.19954	27.1447	17.4592	27.7147
146.187	3.19063	8.14613	9.03533	34.3909	21.2956	20.2116
146.52	-14.3705	-0.736786	2.14543	13.5652	26.242	19.2132
146.853	1.21114	6.36684	2.99945	16.0028	16.8189	9.04074
147.186	-11.4513	-0.0730473	-1.83159	17.9191	12.7075	32.6955
147.519	-4.36661	14.4075	0.905426	19.9185	22.3254	35.8004
147.852	5.24318	19.5307	2.56658	25.5485	25.8281	18.214
148.185	14.3479	12.1367	15.4491	23.2787	27.9122	23.1759
148.518	-2.68201	-2.34202	13.9187	22.8205	13.2288	12.2449
148.851	10.3736	1.24271	-9.15437	8.01988	6.41103	11.1456
149.184	5.44248	-1.11194	2.06156	14.4733	14.6041	26.6803
149.517	14.7069	6.69961	8.84504	9.82622	14.7772	5.83657
149.85	9.96871	14.2938	5.99439	5.69499	10.673	14.8016
150.183	-0.95683	2.37359	0.909936	3.61088	-6.40201	3.79846
150.516	-11.2204	-12.7634	-2.72439	11.8941	-3.14645	15.4824
150.849	1.64402	21.0836	6.90342	3.34214	-3.60457	3.1257
151.182	-1.92448	1.31124	-2.26086	8.30485	-3.16809	8.73682
151.515	-2.23832	9.44024	-8.31026	-5.76352	-6.5914	1.74051
151.848	-4.81752	14.9891	5.43256	6.38398	-11.0112	-13.0971
152.181	-6.57697	-6.7402	3.9662	-10.4557	-5.25219	-30.6222
152.514	-8.9749	-1.24722	-4.77152	-2.44934	-6.70953	-10.278
152.847	-6.70863	-0.947812	4.72824	-4.31971	-22.7367	-12.5389
153.18	-5.02674	-0.612335	17.0705	-2.9255	-14.9927	-17.3447
153.513	-0.981179	9.17872	8.0334	-9.35186	-7.70153	-12.0979
153.846	-6.40923	-2.50074	0.212829	-13.0908	-17.783	-6.20451
154.179	-14.807	7.24431	3.56399	-6.36414	-21.1693	-5.55971
154.512	2.72259	-2.774	-1.97047	-2.31948	-13.19	-33.4304
154.845	-14.0359	3.61629	-12.0979	-4.89417	-31.2101	-17.158
155.178	10.6063	-8.59704	4.70749	-16.6232	-6.13057	-21.6887
155.511	-4.75709	0.481571	-6.76274	-19.3269	-15.3544	-11.5189
155.844	-8.17138	12.4108	-17.5025	-9.53132	-19.7949	-14.779
156.177	-3.74886	8.97851	-12.7806	-16.4708	-15.9315	-9.34194
156.51	-15.1379	-3.6181	-2.0318	-32.5367	-21.9178	-24.4835
156.843	3.17801	-12.4379	-16.9488	-18.8913	-12.703	-31.2093
157.176	-3.2709	5.86814	10.5125	-18.6235	-9.35908	-22.0314
157.509	0.635782	-5.74098	2.91017	-17.7884	-27.1159	-24.029
157.842	-4.49647	-15.137	-2.71718	-24.2878	-18.462	-24.7739
158.175	-2.26717	-15.2957	-4.20158	-28.6463	-28.9475	-15.1235
158.508	8.00094	-0.272349	8.83602	-21.6229	-22.403	-14.9305
158.841	5.48576	-11.8725	-29.1657	-13.5345	-17.0047	-12.9853
159.174	-19.3377	-11.3458	-2.85786	-28.6129	-23.7106	-23.0325
159.507	-5.20891	-18.7191	-24.1372	-22.4634	-21.3542	-9.59355
159.84	6.87006	1.87939	-6.4435	-12.4271	-6.87367	-3.95087
160.173	-4.83645	-13.2982	-2.18511	-4.85449	8.52219	-7.76917
160.506	0.289484	-7.20283	-4.86892	-5.92134	-11.8039	-14.3597
160.839	-2.68472	-4.22502	7.03329	-13.5282	-1.74051	-8.25525
161.172	-12.1899	-6.83579	-11.2042	-6.78438	-5.28466	-2.83893
161.505	27.3693	24.6115	13.8213	21.9349	17.4249	7.44181
161.838	25.2536	31.8937	32.1994	33.3601	31.5402	37.8268
162.171	50.0248	62.6079	4.86081	49.4503	16.9569	14.8124
162.504	4.7093	8.88382	1.95965	3.91029	10.085	4.90319
162.837	-4.49106	8.23902	-3.44134	14.1829	10.6207	7.7313
163.17	-9.60618	8.99294	9.98855	7.11625	0.412131	9.62962
163.503	-10.6054	-2.15986	-12.1926	-3.11488	-1.52227	1.85865
163.836	1.03348	6.97106	3.06618	-8.56097	13.5742	8.62139
164.169	-7.97659	10.4241	-4.45408	16.9208	3.42872	9.97862
164.502	7.64111	0.828771	-4.0176	1.75223	12.3955	2.16707
164.835	5.74549	-7.37778	12.9907	-8.03881	1.61065	13.0746
165.168	-2.5314	2.45836	-1.79191	-4.62453	2.76858	7.75564
165.501	-16.1516	-1.7351	10.2104	-2.04082	-0.186676	8.73141
165.834	-6.96475	-0.000901819	16.864	-8.48341	18.3917	13.9232
166.167	17.627	-5.32705	-18.0454	10.0291	4.3125	16.5881
166.5	-0.171346	-12.5578	4.62092	1.62057	8.16958	12.6146
166.833	-10.2167	-0.864845	-3.48553	2.29242	18.71	-0.375157
167.166	-14.0963	-5.64088	7.96306	12.0988	11.0437	17.8578
167.499	18.1644	9.46188	3.85167	11.913	3.58653	5.59308
167.832	-8.62319	-12.5632	3.06168	1.31846	8.5781	9.43844
168.165	5.63096	-1.16515	-5.85731	8.14433	22.8593	1.35002
168.498	-8.48251	-16.3067	-12.8636	9.46549	16.0966	15.1208
168.831	0.312029	7.00082	8.7251	3.2709	15.0703	12.758
169.164	15.9757	6.7943	4.47753	13.3343	14.8385	7.60955
169.497	13.842	10.8786	7.08829	3.92021	4.93024	0.0252509
169.83	1.03439	-9.80187	-3.67852	10.4196	-4.07983	16.8514
170.163	4.05097	3.23482	-5.69409	10.8823	-2.56387	-7.90805
170.496	2.56387	11.5821	7.42467	4.17452	16.8947	-7.57167
170.829	0.566342	4.91942	2.12559	6.66715	4.49286	17.2743
171.162	-3.56038	1.42307	2.90205	4.08344	13.4795	2.95977
171.495	-0.763841	-4.72734	35.8482	8.478	20.3351	13.1179
171.828	7.12527	-4.39998	-0.450008	15.0504	14.9008	-0.967652
172.161	13.7582	-2.50165	11.1275	3.4711	5.01862	-0.422953
172.494	0.439186	-10.7903	2.2807	7.4887	1.00733	10.1085
172.827	-2.00424	5.32331	-2.22369	-0.865884	-7.53785	-5.10753
173.16	2.09459	-15.6506	-1.89061	3.30555	7.94722	-8.92359
173.493	-4.5434	9.02285	-6.42152	0.852065	-11.7737	-7.40336
173.826	0.708895	-10.8767	5.27044	0.191774	-8.65844	3.53971
174.159	13.8394	-11.4375	0.648647	-2.26833	-2.63428	-4.95005
174.492	-2.4702	-8.89627	4.32236	-7.17479	-0.833227	-6.46439
174.825	8.40365	-25.0484	-13.9665	-7.41916	-4.46067	-6.8087
175.158	11.2432	3.22986	-19.1067	-8.82464	5.88039	0.786955
175.491	0.0473173	-16.8655	0.512261	-13.0359	-16.3872	-13.3764
175.824	-5.24259	5.26035	-23.9276	7.86859	-4.25823	-14.432
176.157	0.31536	-2.28928	4.14109	-8.50942	-6.43569	-24.0067
176.49	-6.91136	6.15051	2.99053	-13.2205	2.48546	-1.7613
176.823	5.34233	6.47465	-4.8036	-8.82818	-3.71407	7.13188
177.156	-2.30861	-3.27713	-0.329164	-9.27685	-22.0049	-21.5742
177.489	-4.7638	2.41084	-6.76716	4.21784	-2.48689	-0.664003
177.822	-18.0567	16.5876	-9.64277	-16.6742	-20.146	-10.2099
178.155	14.4903	-8.24086	13.4099	-11.8781	-20.2283	-17.0248
178.488	1.1407	-8.67556	-20.4441	-15.3091	-21.2137	-12.4627
178.821	-13.9029	2.66623	-9.52381	-1.70921	-20.808	-16.6557
179.154	-0.632243	4.94118	3.87917	1.37131	-16.842	-2.45072
179.487	-0.669722	-12.0968	-6.32628	-2.0712	-7.14666	-5.86418
179.82	-6.01015	1.7052	-15.2913	-18.7365	-2.7895	-14.1089
180.153	-11.9355	-9.54444	-14.3292	-22.3055	-12.9401	-16.2818
180.486	-12.9005	-12.5432	-0.904193	-17.1783	-20.1556	-6.69614
180.819	-10.2041	-21.194	-2.30552	-18.5991	-7.61055	-12.094
181.152	-3.30705	-14.7507	-19.7148	-29.4202	-8.29913	-2.90925
181.485	-17.3312	-11.661	-7.45055	-10.8567	-24.2479	-13.0378
181.818	-12.0986	-7.81801	-4.40933	-9.07469	-11.8323	-4.75752
182.151	-4.50955	-13.6483	-19.5119	-12.402	1.64283	-21.2999
182.484	-19.4253	-7.99026	-16.0372	-27.0236	-11.9632	-3.89944
182.817	-15.1494	-11.9988	-8.9658	-14.5992	-0.60817	-1.10662
183.15	-6.24769	-9.57305	-10.0499	-20.6008	-9.40446	0.317924
183.483	-8.04641	-12.4901	-11.0369	-16.7808	-9.33673	-3.85122
183.816	-24.3834	-7.65855	-7.88305	-20.7981	-22.3612	-8.46711
184.149	-21.2259	-6.10686	3.72128	7.23987	-24.1693	-9.41236
184.482	-22.5575	-3.78272	-4.95881	-14.0437	-5.02108	-16.9866
E
Time in vitro	Adn at 68hr			Adn at 83hr
5.994	20.7182	8.04477	-11.3484	8.95924	10.1957	-3.77401
6.327	33.1209	8.77692	17.1153	15.7258	-1.86213	-2.57453
6.66	28.2781	29.3764	22.5356	20.5006	24.4032	23.0496
6.993	48.9864	41.3623	45.0206	38.4952	20.2572	34.7631
7.326	45.313	58.1884	39.8288	37.5972	42.7478	36.6711
7.659	51.7127	65.2205	44.7718	23.1764	53.9818	47.3272
7.992	54.094	68.7186	67.4376	49.3789	57.2303	53.998
8.325	60.3697	66.5209	68.2633	54.3407	64.3229	67.0221
8.658	65.0407	95.5422	68.5413	65.9822	76.1612	65.28
8.991	57.6273	76.2333	66.7431	70.9626	66.4438	84.9171
9.324	69.1852	89.9499	67.0674	59.3356	73.7084	70.5444
9.657	62.9481	82.5234	82.7598	68.5319	70.1419	77.5201
9.99	62.1707	93.5474	71.404	65.6107	86.9396	77.8812
10.323	57.381	77.7475	73.8934	59.4606	92.5473	79.4602
10.656	59.9489	82.7709	74.8204	56.5628	78.9831	80.6232
10.989	59.7931	81.4267	73.7459	59.557	68.2394	74.361
11.322	44.7746	68.1388	62.187	73.2533	85.782	91.2331
11.655	48.6001	86.7511	65.4168	71.7194	65.6115	71.051
11.988	43.3829	69.5041	74.9953	49.6514	74.7013	76.8286
12.321	37.7889	70.975	64.4548	55.7667	73.9789	118.778
12.654	33.3916	63.7171	67.5057	66.6787	60.3064	74.5227
12.987	35.9203	66.0691	57.9148	43.9141	65.7228	64.6135
13.32	40.6558	71.9372	59.9123	52.806	83.9287	74.3775
13.653	24.8947	54.9614	35.8311	41.26	52.8989	62.2598
13.986	35.2981	29.5842	54.4049	49.5703	59.4641	59.3262
14.319	13.3622	59.5697	49.5676	26.5153	56.7984	52.2072
14.652	26.6515	45.9657	50.5208	22.4724	54.2507	52.9431
14.985	15.2822	20.4812	34.4188	9.06779	47.7964	55.5169
15.318	18.0355	31.4482	31.4104	26.8381	31.4491	30.6339
15.651	15.4004	16.6241	24.736	15.6168	38.6294	35.6119
15.984	6.35602	3.54235	43.1097	21.6328	26.4296	25.4538
16.317	-3.23032	26.7786	22.0026	11.3151	15.1091	19.418
16.65	-10.2925	-0.678168	23.9776	22.7809	35.4397	31.0136
16.983	-7.28669	11.0085	12.4225	-2.75325	1.27247	20.0988
17.316	-10.655	0.430168	15.4671	11.7552	16.212	16.5664
17.649	-17.9579	-5.57234	2.30054	-0.823361	21.549	31.065
17.982	-7.94051	-8.8252	11.2015	-6.61845	13.0105	11.9734
18.315	-30.1442	-13.7599	-9.81991	18.0598	-10.2375	-10.1824
18.648	-27.638	-13.6554	-17.4727	-14.3389	-3.5198	-6.84931
18.981	-14.1811	-14.6338	-10.9598	-18.1022	-11.0906	-1.51686
19.314	-24.9254	-24.5836	-20.7301	-34.1889	-17.3627	-12.8311
19.647	-29.9359	-37.8971	-28.6778	-17.9985	-13.6039	-20.1656
19.98	-30.9297	-23.9613	-22.1469	-35.2873	-16.1642	-22.0765
20.313	-28.5958	-38.6583	-23.0009	-29.5265	-9.63323	-40.7144
20.646	-48.8227	-44.5562	-30.2993	-36.5841	-9.75408	-35.7427
20.979	-43.7373	-48.8669	-24.1651	-36.6382	-33.0174	-43.6724
21.312	-28.8636	-44.0773	-34.0779	-32.1372	-20.3613	-28.7942
21.645	-37.1017	-48.3591	-45.3894	-51.8438	-44.1206	-43.5903
21.978	-46.9225	-41.6947	-51.3081	-44.2595	-37.7916	-42.1285
22.311	-48.6026	-62.7296	-49.4603	-45.2632	-38.4229	-36.0376
22.644	-49.2114	-43.1295	-33.5738	-48.434	-46.9379	-53.3859
22.977	-53.7782	-59.1611	-32.5475	-43.088	-56.3475	-46.2714
23.31	-28.7166	-63.5827	-46.018	-47.3175	-42.3612	-39.9677
23.643	-54.8658	-68.1803	-55.36	-56.7767	-48.6423	-46.0586
23.976	-74.3477	-66.6138	-44.6202	-53.9008	-62.0064	-58.2737
24.309	-57.3313	-58.0393	-59.0015	-39.6557	-52.6383	-59.2234
24.642	-48.6613	-58.63	-58.2386	-57.7218	-67.1945	-49.4567
24.975	-46.6412	-58.1484	-43.3405	-57.4044	-66.7671	-43.9745
25.308	-39.965	-52.8412	-54.0442	-54.0199	-60.3137	-60.5139
25.641	-37.8809	-53.44	-64.3303	-41.2456	-57.6668	-52.4796
25.974	-41.9211	-53.7349	-61.5059	-60.3786	-72.6857	-55.2815
26.307	-50.372	-62.8	-56.2618	-61.0099	-51.7446	-52.1215
26.64	-38.0793	-40.5539	-48.4096	-48.7262	-60.1513	-59.1196
26.973	-31.3842	-44.0412	-49.6947	-39.6349	-49.8201	-50.482
27.306	-37.4661	-38.5564	-53.4265	-43.8573	-56.6559	-49.683
27.639	-36.7708	-36.3424	-49.3133	-49.2529	-62.5015	-48.0038
27.972	-32.1426	-10.0228	-33.7948	-39.0352	-47.5592	-55.3699
28.305	-28.1737	-33.8813	-30.7529	-38.2957	-52.6103	-43.1547
28.638	-14.5184	-42.9185	-19.6993	-25.6108	-35.9573	-45.4436
28.971	-10.6929	-32.9597	-42.3548	-30.8801	-41.4215	-44.2946
29.304	-6.46604	-29.4859	-13.6707	-31.1524	-32.2292	-37.9954
29.637	-9.40778	-23.8901	-31.1479	-19.4549	-37.3416	-37.614
29.97	-0.955928	-12.0555	-24.4104	-27.62	-27.6416	-24.2319
30.303	-7.0919	-10.6027	-17.1715	-5.2576	-40.4673	-25.2401
30.636	-7.60955	5.94209	0.862139	1.28058	-10.6631	-1.21836
30.969	13.2639	4.0672	-9.69185	0.422051	-8.49513	-20.7094
31.302	7.17307	-2.56387	-14.779	-5.76623	-11.7164	-9.74415
31.635	16.1651	18.5252	-4.53885	9.85417	3.77411	-5.63998
31.968	21.1233	14.889	9.32661	16.331	-4.82293	-2.20314
32.301	19.2529	26.8318	-11.041	2.04983	12.0483	14.0639
32.634	27.7138	15.3291	22.3182	23.6881	14.0323	-5.89068
32.967	18.3908	17.9949	7.11806	8.1786	28.1764	15.4256
33.3	25.1175	10.4079	17.7803	20.2557	4.91221	17.3817
33.633	26.2528	12.0285	23.1127	25.1139	12.3107	34.6569
33.966	33.1978	21.1116	28.327	29.9467	31.3346	16.6864
34.299	22.7574	24.9795	30.1208	22.825	26.4882	19.3738
34.632	34.2006	39.717	25.2194	24.1192	25.1986	34.6109
34.965	35.5488	30.0711	43.299	32.2346	27.5325	36.2865
35.298	42.6344	54.1254	32.8451	50.2187	46.9785	44.9647
35.631	40.2509	47.1705	59.8249	59.3875	43.3874	42.9626
35.964	40.8587	51.0889	46.9424	30.2091	58.6236	36.3767
36.297	31.1542	53.8449	53.4256	41.444	50.2674	40.4475
36.63	50.2998	44.9322	45.2154	35.1737	49.9409	67.4714
36.963	43.2079	53.0729	28.5831	56.2221	55.4114	50.9194
37.296	44.6112	38.0153	50.9708	52.2406	57.0617	47.4077
37.629	41.3132	41.5107	21.5255	46.8224	59.2775	55.2463
37.962	38.8116	49.554	53.2461	42.4098	58.3738	60.4607
38.295	28.9484	34.4603	38.8648	54.2489	58.4144	55.056
38.628	38.8305	51.1088	40.6035	53.4048	64.9914	64.1392
38.961	27.7499	32.1895	31.1389	41.5937	49.8499	38.5185
39.294	25.7983	24.3013	49.3863	33.8047	37.5986	32.2734
39.627	18.6767	38.4049	50.3404	35.8843	45.1559	39.4086
39.96	21.4254	46.6664	37.2036	47.3392	38.7106	27.1907
40.293	6.76995	25.4133	43.7445	18.9923	29.6419	38.7088
40.626	14.9765	28.006	19.2069	10.5269	33.9436	29.2803
40.959	4.06811	16.3671	16.6277	19.932	20.4001	29.6662
41.292	20.3586	15.3724	24.2129	18.1248	30.5717	31.4049
41.625	10.8399	-2.39343	18.3394	27.7201	27.0888	21.9052
41.958	-7.41205	15.7268	19.2845	12.6597	12.0772	4.29356
42.291	-0.504117	-4.3639	-4.77423	7.15683	-1.6837	20.7923
42.624	3.04634	2.74333	6.95122	17.9056	9.05606	6.18016
42.957	-5.40099	-8.66828	4.25478	-4.115	4.09336	-5.68417
43.29	-14.1044	-4.88155	-5.40009	-4.36029	-5.42444	4.57853
43.623	-12.4108	-7.07477	-20.8645	-23.2877	-19.1384	2.24102
43.956	-17.1481	-4.64166	-1.69632	-13.6833	-2.7776	-5.76082
44.289	-1.34371	-19.2178	-15.532	-15.5131	-25.4556	-22.9432
44.622	-28.7329	-15.2949	-23.7061	-23.5781	-0.313833	-12.8933
44.955	-10.7903	5.23596	-19.4748	-30.0639	-19.6281	-23.8306
45.288	-15.4915	-21.3289	-13.907	-7.83049	-18.7434	-22.8791
45.621	-30.6808	-17.6333	-20.3568	-15.7755	-21.1837	-12.6841
45.954	-26.8039	-34.9816	-23.9983	-29.8231	-25.2338	-21.6031
46.287	-27.3891	-38.2642	-26.5973	-24.9037	-21.9512	-30.0459
46.62	-31.9794	-27.638	-22.4814	-11.5983	-38.6114	-18.7984
46.953	-21.8754	-21.429	-37.2875	-28.2792	-24.6756	-17.7496
47.286	-8.55285	-33.2654	-34.7471	-18.2934	-25.4701	-37.513
47.619	-18.1121	-42.7886	-23.2354	-8.5754	-22.0702	-25.6838
47.952	-22.3029	-24.3735	-25.4078	-25.3132	-48.2446	-39.0749
48.285	-14.9792	-34.5009	-30.247	-22.3353	-35.8924	-51.4334
48.618	-23.4374	-39.1416	-34.1492	-32.5349	-31.6611	-41.9238
48.951	-30.9225	-35.3143	-43.6363	-17.1273	-37.513	-37.8403
49.284	-23.8576	-28.1665	-28.0628	-24.9614	-41.7425	-23.4139
49.617	-14.7069	-27.39	-27.5451	-16.9001	-33.2771	-42.1654
49.95	-17.6179	-19.0816	-5.47043	-24.194	-43.4406	-35.0988
50.283	-17.0823	-21.8466	-19.9699	-22.8909	-30.9712	-41.0851
50.616	-15.1938	-26.7227	-33.6721	-14.9846	-49.7588	-28.3793
50.949	-19.2574	-22.155	-29.861	-22.8097	-24.6034	-14.8773
51.282	-0.999215	-9.08132	-21.6346	-18.1221	-28.0015	-22.3615
51.615	-18.4404	-13.2261	-21.576	-16.0704	-29.6861	-27.9708
51.948	-7.36966	-16.6521	-2.20314	-22.697	-32.0101	-21.4074
52.281	4.32332	-11.7101	-19.565	-13.2459	-17.6197	-12.1845
52.614	-12.0582	12.1349	-25.2852	-11.9247	-27.9465	-22.7881
52.947	-5.56873	-19.8039	-16.8748	3.87512	-20.2025	-15.4238
53.28	-1.8325	-12.7102	-7.72588	-4.15919	-12.6688	-17.0444
53.613	-1.13359	4.2133	-15.0081	-14.2045	-20.1719	-11.8093
53.946	4.58034	4.48565	3.20506	5.7996	-5.31442	-0.653819
54.279	17.4628	-0.155113	-0.137076	-16.9497	4.15919	-7.69793
54.612	11.7264	0.702517	3.98604	25.8849	-4.97804	-10.5558
54.945	18.0346	14.0981	12.9916	7.72859	13.0827	0.445499
55.278	14.706	12.9267	25.2095	13.1593	6.63378	13.5958
55.611	18.7019	10.3655	6.73569	15.8837	21.1765	26.5414
55.944	12.253	30.6916	6.51745	29.8403	13.1657	7.05944
56.277	21.9845	15.0775	12.896	1.49792	4.72283	7.82598
56.61	26.1128	26.8899	11.5473	5.42298	14.4165	15.6709
56.943	16.375	13.2296	8.23276	6.86124	17.1942	23.1219
57.276	11.5765	22.8568	-4.16209	23.0488	7.24984	7.23155
57.609	14.7913	26.0908	8.78502	17.7867	29.3139	6.95542
57.942	22.0119	16.1912	5.77408	26.0149	14.571	16.2287
58.275	17.7429	16.845	25.9463	6.13799	26.9421	11.5381
58.608	10.9429	18.6316	27.5163	11.667	31.1545	27.8884
58.941	11.2931	19.2122	43.7843	25.32	16.247	14.0608
59.274	17.6249	14.4521	10.8021	23.377	31.9097	36.0005
59.607	3.608	18.3418	17.4567	13.1318	33.711	11.2163
59.94	-1.95761	3.96734	24.3042	22.2021	16.845	14.3424
60.273	22.8641	9.82006	18.2073	0.553178	20.9193	23.3395
60.606	11.8179	0.639127	-1.43461	7.96577	23.8534	30.679
60.939	2.7028	-2.82715	12.6966	15.9452	38.7015	20.8534
61.272	-5.5391	6.81003	6.00084	-5.74117	16.9053	17.5664
61.605	-8.55918	18.542	11.251	-7.35773	14.1111	18.5145
61.938	-2.36084	-0.224929	2.49799	-6.6674	20.8663	29.7491
62.271	-17.4356	-2.05728	-1.98138	-9.45249	10.728	16.3832
62.604	-31.533	-8.47963	15.4926	5.65979	19.3841	0.94909
62.937	-21.1963	-9.75423	0.902458	-9.9124	12.8548	4.18221
63.27	-24.9342	-22.0796	-1.13196	-12.9919	-3.74881	6.36475
63.603	-27.0518	-28.6409	-13.2827	-25.8558	7.35773	6.96365
63.936	-41.5542	-25.5358	-20.8891	-20.4319	13.0203	-0.716846
64.269	-37.9562	-43.7505	-16.2378	-20.2198	-7.84599	-15.4085
64.602	-37.6518	-48.8507	-35.056	-37.2083	-0.764392	-8.50157
64.935	-52.9414	-36.2702	-31.4489	-36.347	-9.32357	-27.9222
65.268	-62.1772	-44.6913	-47.1399	-32.0633	-8.49791	2.8619
65.601	-66.8313	-44.5432	-43.3317	-32.0075	-16.2881	-16.0943
65.934	-55.4541	-54.7189	-33.8179	-40.0647	-9.61982	-16.4216
66.267	-70.5041	-64.2254	-51.6358	-34.6948	-16.642	-18.2759
66.6	-61.6954	-55.3709	-46.0189	-32.8762	-27.7888	-19.9556
66.933	-64.6094	-47.897	-51.4099	-25.053	-18.4606	-23.8232
67.266	-48.7373	-59.9097	-45.3496	-30.1551	-27.3837	-6.41778
67.599	-65.5521	-52.6799	-45.8918	-25.9555	-17.6231	-29.8808
67.932	-76.8415	-83.7768	-40.6188	-38.93	-33.4842	-34.7899
68.265	-53.5705	-73.5828	-72.4847	-41.9821	-34.5521	-22.6337
68.931	-3.46994	13.8852	-16.076	-48.1338	-20.9623	-13.2013
69.264	-11.07	-23.2746	-28.3776	-21.0391	-26.7067	-19.2102
69.597	-16.1034	-17.5801	-38.8331	-17.9019	-18.7347	-15.6801
69.93	-37.0849	-27.0902	-40.1681	-9.46529	-30.0207	-26.0213
70.263	-22.7461	-42.2802	-46.3609	-15.86	-24.0666	-30.7558
70.596	-27.6955	-33.849	-47.6401	-20.8096	-17.4	-29.0323
70.929	-27.3316	-32.5964	-50.8576	-15.147	-37.3043	-45.1521
71.262	-17.5375	-21.9186	-55.7057	-8.62688	-34.794	-41.4088
71.595	-25.1194	-42.4436	-41.661	-23.6238	-34.005	-35.2595
71.928	-19.6896	-23.4912	-46.031	-22.4657	-29.0786	-34.5909
72.261	-23.9752	-15.4549	-27.9094	-23.6228	-38.0615	-41.0899
72.594	-9.00518	-13.6617	-11.5115	-19.7934	-35.1019	-30.0327
72.927	-10.7938	-0.091795	-12.4832	-20.2923	-36.9174	-27.4782
73.26	7.58932	11.288	-7.17392	-17.7526	-26.3044	-17.1073
73.593	21.0832	8.33295	10.0594	6.19199	-16.1392	-24.7272
73.926	33.2418	9.58006	12.8291	-11.9658	-28.4333	-22.5463
74.259	29.8158	39.2298	15.4299	-8.17439	-18.2496	-9.01446
74.592	57.7752	33.6035	39.9345	-8.27638	-23.7165	-14.5379
74.925	62.1647	36.3629	44.9304	7.45023	-2.68153	-6.53506
75.258	69.958	71.9571	49.1474	7.95001	-16.932	-18.8755
75.591	65.2041	48.1488	69.2209	-0.999546	-7.64031	-9.10254
75.924	80.3883	67.2552	72.7981	13.4892	-7.59302	6.22722
76.257	76.2094	66.62	71.0521	0.196571	-6.89761	-5.82852
76.59	82.1213	83.1959	69.4462	8.13916	-1.82663	19.5959
76.923	92.7343	74.5116	73.3915	5.53459	12.3775	-8.00286
77.256	88.4348	69.8996	81.577	13.492	15.1378	7.71912
77.589	97.4603	79.6864	74.4708	17.556	15.1805	6.76223
77.922	84.6304	75.7318	81.8385	14.7929	16.232	4.81043
78.255	86.4514	78.7573	66.9621	21.6627	9.56986	28.6465
78.588	96.0982	82.6387	86.4523	9.53277	29.3818	6.64541
78.921	75.3488	87.3546	76.9733	0.788139	22.5612	16.3117
79.254	64.6803	71.5593	71.3145	0.0463611	15.9074	19.2538
79.587	72.9409	68.0859	79.64	5.79421	-1.60595	15.1128
79.92	62.2815	56.3992	73.64	0.247568	-2.34402	20.9923
80.253	50.1368	60.2333	74.2891	12.4211	17.1879	16.5435
80.586	43.8752	49.3959	66.6784	5.92773	2.20493	8.20962
80.919	56.7652	40.8822	77.4697	-6.63722	20.3021	-0.187441
81.252	37.3254	69.3174	52.0024	-0.117036	8.82434	-3.52571
81.585	33.6982	41.674	49.4615	1.46386	-6.62442	5.37909
81.918	43.9516	50.609	26.9832	-18.8044	3.49737	3.31724
82.251	40.0291	14.2958	37.7661	-5.0737	-12.2723	-13.6667
82.584	41.5112	35.5488	41.2324	-22.214	-18.8684	-1.66319
82.917	32.4684	28.853	40.5	-28.1353	-3.80824	3.72961
83.583	30.0876	22.0842	34.0105	39.7621	29.0176	28.6766
83.916	21.3375	22.0988	25.5658	7.33944	16.0943	12.9435
84.249	25.6638	23.1951	27.9158	-7.85513	3.93899	9.16356
84.582	2.70097	16.8267	5.27668	-10.792	0.510204	-9.79629
84.915	5.16605	-6.71128	-4.40623	-19.9501	14.1806	-12.0657
85.248	-22.9619	2.53913	-9.48998	0.149952	-8.40739	-7.43727
85.581	-13.6841	-0.812852	-19.5734	-32.4355	0.598895	-10.0422
85.914	-12.8374	-4.80579	-13.6073	-13.0916	-6.44978	0.00914344
86.247	-23.9631	-14.1577	-12.714	-19.7297	2.46873	8.80788
86.58	-7.1392	-0.0310877	-13.9803	-26.9914	-23.0351	-21.3316
86.913	-36.3315	-38.215	-24.8098	-4.92192	-17.4905	-6.36658
87.246	-30.3699	-12.1004	-23.0378	-23.5837	-9.58415	-17.0443
87.579	-36.8517	-42.4155	-21.21	-9.7716	-5.83169	12.9901
87.912	-34.9325	-31.3794	-36.3909	0.714103	3.08317	-2.53639
88.245	-40.0254	-34.8009	-36.4284	6.15536	10.0505	4.32942
88.578	-38.4518	-46.8839	-38.3942	4.43365	10.8789	11.8078
88.911	-40.7999	-44.7617	-27.0911	31.0978	24.4934	16.9364
89.244	-25.8924	-32.6896	-35.6329	35.3924	35.1748	30.6909
89.577	-37.6609	-26.7638	-41.4125	36.7	38.4683	21.9379
89.91	-38.109	-33.1925	-33.5016	50.6474	54.1173	27.8646
90.243	-29.9402	-21.1387	-34.4781	65.9471	49.1451	29.6741
90.576	-31.1837	-36.2281	-44.8257	57.0432	42.7447	40.1114
90.909	-24.3984	-40.6984	-49.2411	58.3873	45.2811	53.3986
91.242	-33.764	-26.5965	-42.3405	59.8978	39.7795	51.1384
91.575	-40.4131	-22.0339	-35.1538	67.3159	55.6497	59.0529
91.908	-28.9673	-36.1184	-48.6166	70.9028	48.7949	78.0594
92.241	-25.1079	-35.1885	-44.7773	77.2703	53.4535	55.5482
92.574	-42.7977	-18.382	-5.8198	83.1167	60.2361	60.2452
92.907	-36.7118	-24.7129	-31.8585	55.9231	54.8625	47.6556
93.24	-38.3421	-36.6158	-40.5658	53.6857	59.0566	31.0621
93.573	-35.0185	-33.4705	-27.5922	52.2356	43.361	52.274
93.906	-36.7859	-42.6926	-31.3995	45.7483	55.9487	55.6433
94.239	-34.7423	-29.3084	-41.2525	50.9281	32.8615	26.4566
94.572	-27.9689	-40.2065	-44.449	41.6776	42.9266	30.7841
94.905	-35.8743	-22.4609	-25.8339	26.3733	23.1421	36.6277
95.238	-30.594	-24.0143	-14.9633	30.8198	32.0377	36.4531
95.571	-34.7786	-17.672	-26.3151	38.1406	33.0607	41.5838
95.904	-31.3644	-19.9194	-36.9051	32.4222	26.8471	26.4197
96.237	-20.6336	-28.9159	-31.1615	32.9083	26.1618	31.634
96.57	-23.8757	-34.298	-39.8442	13.8709	12.1141	20.8329
96.903	-18.2375	-19.6714	-2.278	36.7076	23.1452	26.3782
97.236	-15.3291	-24.2616	-1.30133	36.3171	13.4678	12.7707
97.569	-16.3049	-9.3203	-14.1973	9.85057	40.3934	19.978
97.902	-15.3832	-16.8956	-9.31669	22.6014	19.1772	8.39414
98.235	-2.60896	-7.94502	-19.8436	19.84	1.86586	8.28501
98.568	-7.91256	5.59579	-2.87319	18.9544	9.31669	12.3351
98.901	-7.08198	-5.2071	-4.39456	13.9439	17.0281	8.083
99.234	-6.6419	-5.107	-1.02988	2.42319	12.1177	2.131
99.567	-2.63782	-5.51102	-0.0450909	4.07171	9.98855	18.3917
99.9	4.84277	-1.01184	3.60998	5.17915	-13.1963	17.2022
100.233	-0.380568	12.5587	17.1616	44.9151	-12.3477	1.27066
100.566	-4.86171	10.5368	12.6778	-17.8786	1.85414	-4.68405
100.899	-0.353513	9.87853	8.79183	2.14813	-5.24408	-1.1904
101.232	5.67424	1.21746	11.0752	-11.2159	-13.4777	-21.0295
101.565	17.7262	13.2982	10.526	-20.6507	3.64515	-6.66444
101.898	18.4485	3.66589	23.1542	-12.0952	-29.0241	-9.16429
102.231	11.8896	6.56254	2.84163	-17.278	-13.3	-0.0856728
102.564	23.7981	7.63841	37.32	-21.769	-12.6011	-20.3261
102.897	25.1878	15.7403	18.6821	-8.55916	-11.4892	-6.86645
103.23	25.9002	15.6132	47.7189	-24.8677	-4.44958	31.2751
103.563	10.0138	19.1231	26.6379	-15.1497	-25.0372	-26.2583
103.896	52.521	27.4333	43.0528	-17.8623	-18.811	-14.5463
104.229	20.1719	30.0486	28.5227	-24.6224	-39.0785	-24.4754
104.562	29.7267	38.6547	31.6151	-22.0387	-21.5787	-21.4407
104.895	27.5794	21.6518	26.8571	-28.5831	-19.8626	-27.7904
105.228	26.3079	29.8718	30.8341	-19.6894	-19.7174	-25.0579
105.561	28.8771	31.0974	17.5476	-19.4712	-22.6465	-31.634
105.894	12.5596	31.2336	33.5495	-36.015	-24.1561	-24.2084
106.227	32.5521	33.0183	15.294	-35.2296	-20.5534	-15.3417
106.56	24.5403	29.2956	20.3631	-26.4882	-31.4365	-10.94
106.893	30.1839	40.608	31.8017	-31.2056	-32.672	-52.8619
107.226	24.1588	34.8102	15.3571	-29.6121	-27.7959	-42.4622
107.559	20.9826	30.4625	15.1253	-44.5544	-21.301	-35.4
107.892	72.7452	31.6205	10.0309	-36.1386	-49.9878	-32.9849
108.225	23.1317	17.3438	25.2933	-33.3015	-26.683	-29.3713
108.558	13.3812	20.8356	26.9274	-23.7151	-31.5276	-29.1215
108.891	14.8791	4.45499	15.8422	-34.1375	-23.0108	-23.0721
109.224	28.9511	33.1599	15.0433	-36.5507	-42.6524	-33.0264
109.557	39.1011	19.4234	9.08402	-46.7368	-24.7685	-41.8552
109.89	5.42895	11.1898	3.51349	-37.6221	-31.0406	-26.1212
110.223	10.2645	11.3539	23.5402	-42.2078	-32.9741	-30.2209
110.556	15.8513	3.1753	1.06144	-39.4879	-42.3882	-35.0086
110.889	16.7549	6.37135	-5.77344	-36.8772	-32.4799	-39.1624
111.222	15.0162	-6.53368	10.4918	-18.426	-26.6118	-38.0054
111.555	-0.111825	7.71145	-7.02156	-31.2606	-23.3526	-30.2073
111.888	-16.4293	2.8263	-8.68091	-24.58	-33.3799	-26.9842
112.221	-10.6334	-14.7538	-16.6945	-26.0012	-33.857	-31.6268
112.554	-18.2726	-0.272349	-12.8031	-35.4018	-30.1568	-26.4991
112.887	-1.41946	-11.6253	-6.41554	-31.9379	-25.7983	-25.5053
113.22	-15.0225	-7.66906	-13.6797	-32.0966	-24.5683	-17.7162
113.553	-8.54112	-6.64821	-8.53571	-30.4977	-28.704	-25.3646
113.886	-15.9983	-16.7567	-11.3548	-30.1893	-13.4452	-18.2429
114.219	-19.4486	-20.9943	-16.5646	-31.983	-3.47741	-30.4833
114.552	-0.575361	-21.3713	-0.909936	33.9427	-21.7338	-16.6855
114.885	-13.5011	-16.9677	-7.51756	-12.9456	-10.0409	-1.32387
115.218	-6.26133	-3.27	-8.95687	14.761	-3.14915	2.99133
115.551	-15.5212	-15.3472	-20.0826	4.94738	18.4783	17.8172
115.884	-23.0424	-20.6002	3.24114	-2.77309	18.0643	1.95875
116.217	-21.0259	-8.73411	-19.6028	12.6697	8.45997	0.12896
116.55	-25.1445	-8.05325	-0.402211	9.66028	9.13723	6.10081
116.883	-10.5639	-10.7091	-13.6481	3.97883	9.37351	12.9411
117.216	-20.7004	-18.1031	-5.10069	7.52749	22.1739	14.2758
117.549	-14.7592	-5.30179	-8.53571	13.8059	9.30046	-0.888292
117.882	-36.1278	-19.4333	-9.99305	24.8406	28.7329	16.423
118.215	-21.8989	-4.85269	-26.4882	11.8806	13.7591	5.31081
118.548	-13.4064	-22.1874	5.42444	17.2852	24.0452	18.1753
118.881	10.3204	-20.2531	-30.5112	24.1408	11.5523	11.4035
119.214	-10.9733	-7.62668	-9.43573	28.4479	25.6883	21.6842
119.547	-26.4323	-23.4626	-19.4901	28.7202	16.6142	23.661
119.88	-17.8858	-28.7545	-11.7471	26.1573	18.8886	25.8543
120.213	-19.4017	-14.7574	-14.6681	37.0494	36.1548	18.2059
120.546	-16.2138	-18.8588	-28.5543	29.2739	13.208	27.6606
120.879	-19.1059	-25.0814	-26.6298	19.0022	32.0551	29.7808
121.212	-13.2946	-10.049	-14.1964	33.2474	21.7465	40.0849
121.545	-11.9103	-10.4855	-25.4133	23.0297	29.5824	39.5448
121.878	-3.69475	-12.5831	-13.7933	37.66	26.6451	40.176
122.211	-11.9464	-3.59826	6.41554	36.0935	29.0647	29.2541
122.544	-0.838692	-14.9783	4.47212	27.6155	23.2399	25.4493
122.877	-4.84728	-9.64135	-10.3556	33.8606	21.9413	34.8291
123.21	-2.91288	-3.28984	-6.68879	34.7101	35.519	26.2078
123.543	4.93024	-5.80952	2.5774	28.6237	23.3634	19.6588
123.876	-0.0658328	-8.04332	-0.268742	13.0484	24.3121	27.7887
124.209	-6.40652	1.27066	-8.56638	23.5519	28.217	18.1753
124.542	-1.56916	-4.40268	1.11555	15.3093	10.8877	18.4657
124.875	-1.23279	-3.9671	6.63017	26.0725	23.8089	19.9636
125.208	-2.8263	-6.91425	-9.61519	21.0034	3.35928	11.3755
125.541	-6.56975	2.22749	0.0757528	21.9791	0.904525	2.49263
125.874	4.31069	5.26933	4.47933	8.80085	3.6668	3.85438
126.207	5.76352	-0.512233	-5.2071	24.9957	14.8385	5.28015
126.54	13.3253	13.7347	3.70738	10.0769	8.66197	5.39829
126.873	21.1233	2.00023	15.5185	13.1323	-1.80995	8.91088
127.206	6.87186	14.2605	9.21659	0.363433	7.0414	10.8083
127.539	1.5376	2.63511	20.0249	11.4711	8.74764	1.23098
127.872	3.20867	-1.80364	-2.46467	11.3305	-3.83093	5.77976
128.205	27.1222	10.9616	-3.41789	7.71687	-5.43526	10.8624
128.538	10.012	8.71879	12.6498	-3.63884	-3.70918	11.1889
128.871	4.79768	20.8618	15.6736	-4.38374	-3.1735	-2.4313
129.204	19.4576	8.36076	15.2425	-4.0663	-2.14002	2.61528
129.537	7.44903	41.6929	19.6128	-8.26607	35.3504	-2.44483
129.87	14.1441	29.3641	11.197	-15.1289	-5.97906	-7.03509
130.203	18.0301	9.5196	10.0886	-20.4208	-14.7438	-6.70773
130.536	19.4766	20.373	-5.17554	-5.91052	-15.7611	-10.0742
130.869	9.50878	13.1197	13.2035	-12.8455	-7.95404	-24.442
131.202	15.4653	22.247	24.3338	-19.4901	-22.2596	-5.18275
131.535	16.2598	8.45636	7.18569	-17.0949	-15.284	-14.0657
131.868	4.79317	7.67989	14.3209	-22.6681	-16.3374	-28.208
132.201	17.4123	8.23812	8.97941	-21.7284	-25.3204	-33.8426
132.534	8.79724	2.85155	7.835	-16.4907	-17.3871	-20.1836
132.867	10.2248	16.763	13.2225	-17.4006	-27.1303	-18.2131
133.2	1.2878	0.676364	8.50325	-30.0784	-19.3233	-28.1043
133.533	2.23651	-4.42703	-5.77344	-34.7209	-13.4551	-20.116
133.866	-0.912641	6.84841	12.1511	-23.6114	-26.1455	-18.2366
134.199	4.68315	6.15401	8.82069	-38.3309	-39.5186	-28.8131
134.532	-0.258822	-1.60343	2.63692	-23.6231	-16.5231	-18.986
134.865	-1.24902	-19.5559	-1.67378	-28.8762	-19.9374	-24.9993
135.198	-1.46185	0.434677	1.18589	-21.5571	-33.9706	-12.639
135.531	2.9264	58.1042	-11.8012	-30.0477	-33.3348	-23.6051
135.864	2.54764	2.98592	-10.1401	-22.9017	-20.9357	-20.5272
136.197	-11.8472	-23.4879	-3.36379	-36.4109	-6.6455	-29.319
136.53	4.38374	-13.8961	-17.2184	-24.6269	-4.00768	-31.4437
136.863	-16.0307	-8.44824	2.41958	-18.7425	-26.6542	-18.2772
137.196	-2.46918	-13.4966	-3.09685	-22.0116	-8.15695	-6.68338
137.529	-8.35084	-22.715	-15.5798	-25.948	-18.4467	-25.3979
137.862	-2.90025	-14.0179	-14.0089	-4.67323	-9.49616	-7.2371
138.195	0.141586	-9.80457	-2.37088	-19.3657	-31.4771	-4.83555
138.528	-11.8607	-20.0132	-10.6956	-27.2999	-13.5291	-17.8434
138.861	-10.0445	-12.5876	-14.3552	-14.0612	-6.26223	-6.78168
139.194	-13.4064	-20.3261	-1.20934	-15.5392	-1.83971	-22.2109
139.527	-22.8846	-2.79654	2.65496	8.93883	-6.46153	-1.77568
139.86	-15.1596	-11.3746	-0.101004	-1.0885	-3.75968	-4.44056
140.193	-2.78031	-13.7924	2.78572	4.97714	11.9202	-5.5552
140.526	0.0865746	-16.7026	-4.15919	-0.303011	4.42613	-0.821557
140.859	-7.31556	-4.44146	-3.70557	0.872059	-3.41519	5.19899
141.192	12.3793	4.03293	-5.3541	13.9358	13.7257	9.85057
141.525	7.67357	-14.3227	-6.22616	11.234	18.2781	19.1105
141.858	8.21828	-2.89754	1.03168	15.1163	8.21016	22.8927
142.191	-4.91852	-1.71255	-0.488786	7.55905	20.1394	17.9877
142.524	0.261528	-3.28803	-2.67029	5.2071	21.2423	32.1039
142.857	15.7034	-6.11704	-4.84998	24.2896	17.2491	31.3499
143.19	-13.0971	11.0085	2.93001	10.2645	19.0112	35.0772
143.523	6.11253	4.90409	7.66997	37.3308	32.0326	19.7183
143.856	16.1029	4.44597	17.6603	33.168	27.9032	16.9262
144.189	6.00341	-2.61618	13.8059	40.8822	27.7264	32.4348
144.522	6.83849	7.76015	-2.23922	31.6583	21.5886	14.9008
144.855	7.31015	2.91738	-7.49502	30.9504	25.3077	8.24714
145.188	-17.3221	4.73545	1.56466	14.9594	26.8778	6.82587
145.521	-7.64021	-3.50717	-9.21208	19.3927	14.2532	19.1862
145.854	-0.509528	6.22075	-2.19954	27.1447	17.4592	27.7147
146.187	3.19063	8.14613	9.03533	34.3909	21.2956	20.2116
146.52	-14.3705	-0.736786	2.14543	13.5652	26.242	19.2132
146.853	1.21114	6.36684	2.99945	16.0028	16.8189	9.04074
147.186	-11.4513	-0.0730473	-1.83159	17.9191	12.7075	32.6955
147.519	-4.36661	14.4075	0.905426	19.9185	22.3254	35.8004
147.852	5.24318	19.5307	2.56658	25.5485	25.8281	18.214
148.185	14.3479	12.1367	15.4491	23.2787	27.9122	23.1759
148.518	-2.68201	-2.34202	13.9187	22.8205	13.2288	12.2449
148.851	10.3736	1.24271	-9.15437	8.01988	6.41103	11.1456
149.184	5.44248	-1.11194	2.06156	14.4733	14.6041	26.6803
149.517	14.7069	6.69961	8.84504	9.82622	14.7772	5.83657
149.85	9.96871	14.2938	5.99439	5.69499	10.673	14.8016
150.183	-0.95683	2.37359	0.909936	3.61088	-6.40201	3.79846
150.516	-11.2204	-12.7634	-2.72439	11.8941	-3.14645	15.4824
150.849	1.64402	21.0836	6.90342	3.34214	-3.60457	3.1257
151.182	-1.92448	1.31124	-2.26086	8.30485	-3.16809	8.73682
151.515	-2.23832	9.44024	-8.31026	-5.76352	-6.5914	1.74051
151.848	-4.81752	14.9891	5.43256	6.38398	-11.0112	-13.0971
152.181	-6.57697	-6.7402	3.9662	-10.4557	-5.25219	-30.6222
152.514	-8.9749	-1.24722	-4.77152	-2.44934	-6.70953	-10.278
152.847	-6.70863	-0.947812	4.72824	-4.31971	-22.7367	-12.5389
153.18	-5.02674	-0.612335	17.0705	-2.9255	-14.9927	-17.3447
153.513	-0.981179	9.17872	8.0334	-9.35186	-7.70153	-12.0979
153.846	-6.40923	-2.50074	0.212829	-13.0908	-17.783	-6.20451
154.179	-14.807	7.24431	3.56399	-6.36414	-21.1693	-5.55971
154.512	2.72259	-2.774	-1.97047	-2.31948	-13.19	-33.4304
154.845	-14.0359	3.61629	-12.0979	-4.89417	-31.2101	-17.158
155.178	10.6063	-8.59704	4.70749	-16.6232	-6.13057	-21.6887
155.511	-4.75709	0.481571	-6.76274	-19.3269	-15.3544	-11.5189
155.844	-8.17138	12.4108	-17.5025	-9.53132	-19.7949	-14.779
156.177	-3.74886	8.97851	-12.7806	-16.4708	-15.9315	-9.34194
156.51	-15.1379	-3.6181	-2.0318	-32.5367	-21.9178	-24.4835
156.843	3.17801	-12.4379	-16.9488	-18.8913	-12.703	-31.2093
157.176	-3.2709	5.86814	10.5125	-18.6235	-9.35908	-22.0314
157.509	0.635782	-5.74098	2.91017	-17.7884	-27.1159	-24.029
157.842	-4.49647	-15.137	-2.71718	-24.2878	-18.462	-24.7739
158.175	-2.26717	-15.2957	-4.20158	-28.6463	-28.9475	-15.1235
158.508	8.00094	-0.272349	8.83602	-21.6229	-22.403	-14.9305
158.841	5.48576	-11.8725	-29.1657	-13.5345	-17.0047	-12.9853
159.174	-19.3377	-11.3458	-2.85786	-28.6129	-23.7106	-23.0325
159.507	-5.20891	-18.7191	-24.1372	-22.4634	-21.3542	-9.59355
159.84	6.87006	1.87939	-6.4435	-12.4271	-6.87367	-3.95087
160.173	-4.83645	-13.2982	-2.18511	-4.85449	8.52219	-7.76917
160.506	0.289484	-7.20283	-4.86892	-5.92134	-11.8039	-14.3597
160.839	-2.68472	-4.22502	7.03329	-13.5282	-1.74051	-8.25525
161.172	-12.1899	-6.83579	-11.2042	-6.78438	-5.28466	-2.83893
161.505	27.3693	24.6115	13.8213	21.9349	17.4249	7.44181
161.838	25.2536	31.8937	32.1994	33.3601	31.5402	37.8268
162.171	50.0248	62.6079	4.86081	49.4503	16.9569	14.8124
162.504	4.7093	8.88382	1.95965	3.91029	10.085	4.90319
162.837	-4.49106	8.23902	-3.44134	14.1829	10.6207	7.7313
163.17	-9.60618	8.99294	9.98855	7.11625	0.412131	9.62962
163.503	-10.6054	-2.15986	-12.1926	-3.11488	-1.52227	1.85865
163.836	1.03348	6.97106	3.06618	-8.56097	13.5742	8.62139
164.169	-7.97659	10.4241	-4.45408	16.9208	3.42872	9.97862
164.502	7.64111	0.828771	-4.0176	1.75223	12.3955	2.16707
164.835	5.74549	-7.37778	12.9907	-8.03881	1.61065	13.0746
165.168	-2.5314	2.45836	-1.79191	-4.62453	2.76858	7.75564
165.501	-16.1516	-1.7351	10.2104	-2.04082	-0.186676	8.73141
165.834	-6.96475	-0.000901819	16.864	-8.48341	18.3917	13.9232
166.167	17.627	-5.32705	-18.0454	10.0291	4.3125	16.5881
166.5	-0.171346	-12.5578	4.62092	1.62057	8.16958	12.6146
166.833	-10.2167	-0.864845	-3.48553	2.29242	18.71	-0.375157
167.166	-14.0963	-5.64088	7.96306	12.0988	11.0437	17.8578
167.499	18.1644	9.46188	3.85167	11.913	3.58653	5.59308
167.832	-8.62319	-12.5632	3.06168	1.31846	8.5781	9.43844
168.165	5.63096	-1.16515	-5.85731	8.14433	22.8593	1.35002
168.498	-8.48251	-16.3067	-12.8636	9.46549	16.0966	15.1208
168.831	0.312029	7.00082	8.7251	3.2709	15.0703	12.758
169.164	15.9757	6.7943	4.47753	13.3343	14.8385	7.60955
169.497	13.842	10.8786	7.08829	3.92021	4.93024	0.0252509
169.83	1.03439	-9.80187	-3.67852	10.4196	-4.07983	16.8514
170.163	4.05097	3.23482	-5.69409	10.8823	-2.56387	-7.90805
170.496	2.56387	11.5821	7.42467	4.17452	16.8947	-7.57167
170.829	0.566342	4.91942	2.12559	6.66715	4.49286	17.2743
171.162	-3.56038	1.42307	2.90205	4.08344	13.4795	2.95977
171.495	-0.763841	-4.72734	35.8482	8.478	20.3351	13.1179
171.828	7.12527	-4.39998	-0.450008	15.0504	14.9008	-0.967652
172.161	13.7582	-2.50165	11.1275	3.4711	5.01862	-0.422953
172.494	0.439186	-10.7903	2.2807	7.4887	1.00733	10.1085
172.827	-2.00424	5.32331	-2.22369	-0.865884	-7.53785	-5.10753
173.16	2.09459	-15.6506	-1.89061	3.30555	7.94722	-8.92359
173.493	-4.5434	9.02285	-6.42152	0.852065	-11.7737	-7.40336
173.826	0.708895	-10.8767	5.27044	0.191774	-8.65844	3.53971
174.159	13.8394	-11.4375	0.648647	-2.26833	-2.63428	-4.95005
174.492	-2.4702	-8.89627	4.32236	-7.17479	-0.833227	-6.46439
174.825	8.40365	-25.0484	-13.9665	-7.41916	-4.46067	-6.8087
175.158	11.2432	3.22986	-19.1067	-8.82464	5.88039	0.786955
175.491	0.0473173	-16.8655	0.512261	-13.0359	-16.3872	-13.3764
175.824	-5.24259	5.26035	-23.9276	7.86859	-4.25823	-14.432
176.157	0.31536	-2.28928	4.14109	-8.50942	-6.43569	-24.0067
176.49	-6.91136	6.15051	2.99053	-13.2205	2.48546	-1.7613
176.823	5.34233	6.47465	-4.8036	-8.82818	-3.71407	7.13188
177.156	-2.30861	-3.27713	-0.329164	-9.27685	-22.0049	-21.5742
177.489	-4.7638	2.41084	-6.76716	4.21784	-2.48689	-0.664003
177.822	-18.0567	16.5876	-9.64277	-16.6742	-20.146	-10.2099
178.155	14.4903	-8.24086	13.4099	-11.8781	-20.2283	-17.0248
178.488	1.1407	-8.67556	-20.4441	-15.3091	-21.2137	-12.4627
178.821	-13.9029	2.66623	-9.52381	-1.70921	-20.808	-16.6557
179.154	-0.632243	4.94118	3.87917	1.37131	-16.842	-2.45072
179.487	-0.669722	-12.0968	-6.32628	-2.0712	-7.14666	-5.86418
179.82	-6.01015	1.7052	-15.2913	-18.7365	-2.7895	-14.1089
180.153	-11.9355	-9.54444	-14.3292	-22.3055	-12.9401	-16.2818
180.486	-12.9005	-12.5432	-0.904193	-17.1783	-20.1556	-6.69614
180.819	-10.2041	-21.194	-2.30552	-18.5991	-7.61055	-12.094
181.152	-3.30705	-14.7507	-19.7148	-29.4202	-8.29913	-2.90925
181.485	-17.3312	-11.661	-7.45055	-10.8567	-24.2479	-13.0378
181.818	-12.0986	-7.81801	-4.40933	-9.07469	-11.8323	-4.75752
182.151	-4.50955	-13.6483	-19.5119	-12.402	1.64283	-21.2999
182.484	-19.4253	-7.99026	-16.0372	-27.0236	-11.9632	-3.89944
182.817	-15.1494	-11.9988	-8.9658	-14.5992	-0.60817	-1.10662
183.15	-6.24769	-9.57305	-10.0499	-20.6008	-9.40446	0.317924
183.483	-8.04641	-12.4901	-11.0369	-16.7808	-9.33673	-3.85122
183.816	-24.3834	-7.65855	-7.88305	-20.7981	-22.3612	-8.46711
184.149	-21.2259	-6.10686	3.72128	7.23987	-24.1693	-9.41236
184.482	-22.5575	-3.78272	-4.95881	-14.0437	-5.02108	-16.9866
F
Deg	PBS	Adn
22.5	1.34
28.26	1.81
32.22		-1.18
50.94		-6.3
78.48	1.65
92.7		-4.03
112.68		-1.17
121.32	1.53
138.6		-4.6
148.5		-1.19
171		-0.72
174.6	1.47
178.2	0.91
179.64	1.61
203.058	1.09
205.2	1.5
231.84		6.36
254.88	2.28
264.96		7.33
281.88	1.39
287.1	1.39
311.58	1.67
324	1.85
328.32		4.13
353.7		2.4
