# Supplementary material for: An adipokine feedback regulating diurnal food intake rhythms in mice
Source: eLife. 2020 Jul 9;9:e55388. doi: 10.7554/eLife.55388 (PMC7375813; doi:10.7554/eLife.55388)
Supplement: Figure 6—source data 1. [file elife-55388-fig6-data1.xlsx]

## Sheet: Sheet1
A
Time after treatment (hr)	PBS			gAdn
0	3162	3685	3081	3504	3625	3776
0.5	3061	4038	3001	3434	3242	3494
1	3273	3373	2870	3585	3484	3585
1.5	3434	3585	3142	3998	4269	4269
2	3434	3565	3021	4098	4602	4410
2.5	3645	3544	3132	4531	5236	4974
3	3675	3776	3222	4823	5639	5286
3.5	4048	3977	3404	5266	5991	5961
4	3947	4068	3575	5337	6273	5981
4.5	4209	4239	3756	5679	6565	6545
5	4138	4249	4118	6182	6877	7038
5.5	4300	4380	4229	6343	6988	7089
6	4340	4461	4098	6454	7642	7078
6.5	4471	4602	4229	6756	7632	7743
7	4441	4320	4229	6887	7401	7451
7.5	4269	4279	4249	6686	7451	7582
8	4310	4179	4229	6837	7290	7693
8.5	4128	3947	4149	6505	7058	7622
9	3877	3937	4068	6343	6786	7813
9.5	3786	3806	3887	6001	6364	7824
10	3575	3595	3887	5800	6253	7723
10.5	3373	3414	3826	5739	5981	7773
11	3192	3273	3514	5347	5760	7260
11.5	3071	3242	3252	4833	5498	7149
12	2850	2920	3162	4592	5206	6907
12.5	2880	2719	2950	4330	4974	6545
13	2407	2528	2789	4169	4692	6213
13.5	2296	2387	2759	3685	4249	5850
14	2155	2246	2517	3555	3957	5679
14.5	2105	1934	2316	3192	3867	5035
15	1732	1883	2095	3031	3484	4632
15.5	1611	1642	1994	2890	3122	4279
16	1440	1652	1692	2548	2769	4068
16.5	1360	1309	1672	2246	2709	3685
17	1249	1279	1360	2034	2588	3363
17.5	1229	1269	1279	1984	2397	3051
18	1047	1027	1480	1813	2256	2719
18.5	1037	1027	1178	1541	2165	2487
19	896	886	1058	1329	1883	2366
19.5	826	866	1128	1329	1843	2427
20	756	957	856	1199	1682	1984
20.5	524	705	766	1178	1702	1883
21	675	826	937	1068	1571	1631
21.5	735	776	745	1078	1672	1672
22	786	725	967	1027	1339	1732
22.5	796	675	786	1128	1491	1561
23	917	816	826	1017	1591	1470
23.5	816	776	836	1027	1642	1571
24	886	856	796	927	1642	1440
B
	PBS					Adn
N44	100	91	103	117	89	103	118	134	121	152
MBH	99	87	101	112	101	122	118	114	118	132
C
	PBS					Adn
N44	87	98	112	128	75	69	109	112	87	104
MBH	92	104	80	125	98	78	72	73	82	115
D
	PBS					Adn
N44	87	98	112	128	75	169	109	112	87	140
MBH	92	104	80	125	98	78	172	113	108.2	115
E
	PBS					Adn
N44	86	93	100	138	84	78	123	91	75	111
MBH	86	112	75	114	113	83	80	64	83	122
F
	PBS					Adn
N44	101	82	84	133	100	78	132	102	95	95
MBH	80	122	77	106	115	96	93	77	71	150
G
	-					+
N44	104.388	97.8604	97.2147	105.044	94.3873	162.781	201.863	215.98	185.237	196.234
MBH	92.3137	127.24	85.1409	110.342	89.2343	196.277	144.991	201.668	176.335	191.22
H
	-					+
N44	62.1227	179.799	89.5289	95.3234	104.234	177.394	235	269.921	203.345	199.408
MBH	120.04	98.7038	90.089	88.2342	111.432	226.009	140.384	168.516	157.54	187.404
I
	-					+
N44	80.9853	110.6	108.415			97.1703	97.3882	102.679
MBH	92.5134	109.892	97.5949			105.707	115.445	185.829
J
	-					+
N44	91.4604	95.1111	113.429			128.395	115.67	138.85
MBH	105.11	100.96	93.9298			98.151	132.292	164.371
K
	-					+
N44	65.8	112.3	121.9			95.69	83.28	105.93
MBH	75.76	113.34	110.89			101.44	122.28	84.37
L
	Cry1	-	-	-	-	-	12	25	50
	Cl/Bm	-	5	10	20	40	40	40	40
		102.636	139.491	224.625	406.348	742.652	263.032	120.745	155.336
		97.366	135.445	104.184	324.892	512.04	296.032	128.363	150.951
		100.508	194.212	197.53	235.248	340.196	128.583	432.287	158.793
		96.4755	152.641	375.389	366.56	535.189	182.984	177.795	113.276
		103.017	170.103	378.841	410.028	573.932	187.383	194.122	108.919
		96.7594	163.148	371.042	382.811	492.193	244.709	98.804	143.59
		100.423				592.307
		103.191				787.3
		60.4024				790.812
		112.799				272.353
		126.799				251.964
						297.229
M
	AdipoR1 KD		AdipoR2 KD
	Adipor1	Adipor2	Adipor1	Adipor2
	3.73443	50.8221	84.3833	9.27279
	3.58307	73.2728	100.01	10.7998
	3.68393	46.6635	90.8063	9.79589
N
	Con	Adipor1 KD	Adipor2 KD	Adipor1/2 KD
Bmal1 mRNA	112.001	60.2392	151.676	45.2235
	115.023	51.6404	168.23	50.0441
	89.9032	55.0649	178.454	43.5923
	78.0023			50.6494
O
	Con	Adipor1 KD	Adipor2 KD	Adipor1/2 KD
Npy mRNA	87.0696	66.9555	177.522	54.9957
	106.512	24.811	148.079	34.9574
	108.38	50.2709	157.846	65.6623
P
	Con	Adipor1 KD	Adipor2 KD	Adipor1/2 KD
Phase shift	2.625	0.45	1.875	0.925
	2.633	0.44	1.582	0.525
	2.725	0.65	2.975	0.325
	2.125	0.45	2.4045	-0.475
Q				Q inset
	Con	KD			Con	KD
AdipoR1 mRNA	0.840113	0.530256		ADIPOR+ cells	213	38
	0.380274	0.246526			187	55
	0.397549	0.220842			157	26
	1.13079	0.528952			162	68
	1.18449	0.468012			265	59
	2.06679	0.406037			125	70
	1.02111	0.737006				75
		0.262339				81
		0.245594				81
		0.215547
R
ZT	Con										KD
0-6	5.31915	5.1948	4.41176	3.84615	7.04607	6.01504	1.16644	3.64583	2.95405	1.99147	2.94985	6.5	7.29783	9.23483	2.30415	3.49854	24.7934	7.92079	7.38832	18.3333
6-12	22.8723	9.30736	23.5294	11.1111	20.8672	11.5288	8.20895	19.0636	8.97105	10.3841	15.3392	20.5	10.6509	14.5119	7.60369	7.87172	39.6694	22.5248	53.6082	8.57143
12-18	32.1808	38.0952	38.4804	51.4957	49.0515	57.8947	63.3764	49.084	54.709	48.9331	50.1475	31.75	30.7692	26.1214	43.0876	48.688	35.5372	34.1584	27.4914	38.0952
18-24	39.6277	47.4026	33.5784	33.547	23.0352	24.5614	27.2482	28.2065	33.3659	38.6913	31.5634	41.25	51.282	50.1319	47.0046	39.9417	0	35.396	11.512	35
S
CT	Con										KD
0-6	9.92908	2.31959	2.65252	2.90456	9.87013	0	3.22481	1.94191	2.60601	3.38164	0	4.84375	9.95475	10.7345	0	5.39326	3.73626	0.943396	6.48649	11.0672	16.5746	1.79563	7.76219	6.32185
6-12	11.1111	0.257732	7.95756	2.07469	5.97403	15.3247	16.5843	12.978	21.1497	12.3188	9.75057	17.1875	6.1086	14.6893	7.74059	11.236	8.79121	12.2642	17.5676	8.69565	30.7551	31.0051	21.6112	43.1778
12-18	33.0969	56.701	52.5199	58.7137	51.9481	50.9091	54.4164	59.0399	52.7969	49.7585	51.4739	23.75	33.7104	31.3559	40.3766	45.618	37.8022	43.8679	46.4865	40.7115	41.2523	29.4295	47.3833	23.1043
18-24	45.8629	40.7216	36.87	36.307	32.2078	35.8441	25.7746	26.0401	23.4474	34.5411	38.7755	54.2188	50.2263	43.2203	51.8828	37.7528	49.6703	42.9245	29.4595	39.5257	11.418	37.7698	23.2433	27.3961
T
LD			DD
Con	KD		CON	KD
14.5022	18.2891		21.0402	22.0312
27.9412	27		2.57732	16.0633
14.9573	17.9487		15.7005	25.4237
27.9133	23.7467		10.6101	16.6292
17.5439	32.0455		4.97925	17.7239
9.37539	11.3703		15.8442	12.5275
22.7095	64.4628		15.3247	13.2075
11.9251	30.4455		19.8091	24.0541
12.3755	60.9966		14.9199	19.7628
	26.9048		23.7557	47.3296
				32.8007
				29.3734
				49.4996
