# Supplementary material for: An adipokine feedback regulating diurnal food intake rhythms in mice
Source: eLife. 2020 Jul 9;9:e55388. doi: 10.7554/eLife.55388 (PMC7375813; doi:10.7554/eLife.55388)
Supplement: Figure 7—source data 1. [file elife-55388-fig7-data1.xlsx]

## Sheet: Sheet1
A
Time in DD (hr)	WT			MT
36	0.87	1.18	0.89	0.76	0.66	0.83
42	0.87	0.78	0.82	0.98	0.64	0.78
48	1.44	1.14	1.03	0.82	0.88	0.75
52	0.95	0.99	1.05	1.05	1	0.99
60	0.87	1.18	0.89	0.76	0.66	0.83
B
	- Adn					+ Adn
N44	93.84	101.7	88.63	115.23	100.6	115.42	128.78	139.25	173.05	142.17
MBH	99.82	106.87	86.14	113.8	93.55	108.25	103.99	146.16	174.54	117.62
C
	Con										Adipor1 KD										Adipor2 KD
N44	110.32	102.03	93.47								26.43	23.02	24.54								93.72	96.4	143.2
MBH	130.08	112.71	71.41	81.07	87.48	132.42	84.83				69.1	46.52	92.84	51.39	83.73	72.14	65.28	46.52	42.84	75.39
D
	Con					Pgc1α KD
Pgc1α	103.037	114.326	101.37	83.8139		34.8477	47.7015	43.6961	35.7214
Bmal1	102.216	95.9326	97.0691	104.42		62.3483	62.7701	59.292	71.7722
E
	- Adn					+ Adn
Con	86.89	105.56	98.91	108.64		128.92	145.05	119.92	127.58
Pgc1α KD	87.74	68.36	85.52	81.66		74.46	91.5	99.64	91.54
F
	- Adn					+ Adn
PBS	115.759	110.922	94.2473	82.6334		114.385	162.229	126.835	139.671
VPR66	83.9992	80.6623	96.2245	97.165		91.8402	107.52	107.255	110.512
G
	- Adn			+ Adn
RORE	1.12356	1.43204	1.95622	3.00647	2.67228	3.88542
3'-UTR	0.146409	0.277022	0.318215	0.273208	0.381055	0.34822
H
Time after syncrhonization (hr)	PBS								Adn								PBS								Adn
23	2970	3001	2900	2709	2809	2829	2678	2719	2084	2175	2407	2386	2064	2074	2165	1953	2517	3635	3554	3303	2759	3514	3343	2709	2336		2678	2306	2407	2467	2850
23.3333	2628	2729	2789	2688	2568	2618	2376	2346	2145	2457	2074	2074	2044	1984	1913	1923	2256	2900	2678	2799	2648	2598	2497	2437	2145		2386	2185	2266	2165	2769
23.6667	2588	2497	2628	2437	2477	2427	2336	2286	2135	1933	2135	2094	2034	1974	2034	2084	2155	2658	2558	2437	2396	2537	2346	2376	1984		2336	2034	2145	2155	2306
24	2376	2497	2477	2346	2487	2326	2306	2326	2256	2104	2316	2296	2286	2155	2044	2266	2215	2709	2457	2477	2185	2517	2407	2366	2034		2407	2326	2225	2215	2326
24.3333	2366	2497	2578	2407	2477	2417	2437	2346	2245	2376	2608	2537	2417	2316	2316	2739	2094	2618	2618	2467	2316	2527	2497	2326	2266		2678	2276	2447	2286	2366
24.6667	2427	2598	2427	2608	2527	2457	2326	2366	2668	2427	2638	2648	2578	2427	2386	2487	2205	2638	2628	2386	2376	2558	2477	2386	2517		2568	2517	2568	2386	2558
25	2477	2598	2578	2638	2668	2588	2558	2417	2779	2628	2991	2850	2759	2578	2568	2457	2245	2688	2688	2558	2558	2547	2618	2457	2638		2829	2749	2618	2568	2608
25.3333	2638	2618	2547	2628	2527	2507	2537	2487	2850	2668	2920	2789	2779	2578	2467	2729	2437	2880	2668	2527	2618	2477	2507	2477	2759		2809	2719	2668	2699	2608
25.6667	2568	2789	2527	2658	2678	2477	2487	2688	3111	2739	3091	2930	2809	2558	2729	2829	2417	2709	2668	2578	2527	2547	2497	2437	2779		2759	2799	2709	2709	2719
26	2719	2819	2658	2809	2749	2719	2558	2608	3192	2900	3101	3071	2759	2789	2819	2960	2386	2719	2799	2678	2467	2547	2769	2477	2940		2870	2890	2930	2809	2910
26.3333	2688	2910	2729	2829	2648	2678	2668	2709	3484	3051	3343	3293	3222	2930	2940	3152	2427	2970	2779	2759	2588	2648	2537	2719	3091		3152	3172	2960	2729	2991
26.6667	2749	3091	2688	2870	2890	2779	2850	2829	3585	3222	3444	3494	3262	3071	3282	3313	2709	2809	2900	2759	2648	2688	2759	2699	3333		3061	3343	2950	3111	3222
27	2960	3101	2658	2930	2870	2819	2890	2819	3997	3494	3625	3655	3444	3272	3615	3846	2749	2860	3041	2799	2578	2759	2960	2709	3605		3333	3554	3131	3202	3353
27.3333	2960	3242	2860	2930	2960	2809	2980	2829	4088	3564	4048	4098	3766	3373	3846	4017	2739	3061	3001	2900	2940	2779	2799	2608	3534		3444	3655	3635	3353	3504
27.6667	2890	3282	2819	3192	3051	3101	3011	2991	4511	3997	4007	4279	3877	3685	3957	4501	2749	2900	2940	2970	2910	2769	2850	2829	3846		3574	3786	3504	3363	3725
28	3111	3423	2960	3142	3101	3051	3232	3192	4732	3987	4420	4400	4118	3826	4390	4934	2980	2960	3111	3101	2809	2950	3091	2910	3967		3866	4088	3695	3826	3655
28.3333	3232	3464	3031	3373	3282	3262	3504	3152	4783	4380	4863	4904	4380	4138	4712	5055	3202	3192	3192	3222	3031	3001	3061	2980	4259		3987	4340	4038	3725	3897
28.6667	3333	3695	2991	3444	3373	3313	3282	3222	4853	4511	4924	4873	4601	4340	4813	5679	3162	3182	3282	3212	3172	3091	3313	3061	4259		4128	4320	4088	3957	3927
29	3383	3574	3232	3635	3393	3353	3504	3383	5115	4672	4994	5195	4682	4430	5336	6051	3192	3152	3423	3212	3313	3282	3272	3041	4460		4138	4541	4148	4058	4158
29.3333	3544	3806	3383	3544	3585	3413	3534	3504	5487	4853	5256	5246	5044	4400	5578	6102	3323	3333	3454	3252	3413	3282	3423	3081	4541		4491	4521	4249	4128	4209
29.6667	3434	3877	3454	3897	3605	3605	3544	3373	5628	5014	5347	5417	5135	4863	5487	6333	3574	3333	3434	3373	3363	3343	3313	3152	4732		4320	4793	4440	4239	4440
30	3736	4017	3343	3836	3736	3806	3836	3655	5679	5135	5659	5618	5024	5024	5749	6514	3635	3595	3605	3585	3383	3544	3494	3454	4843		4612	4551	4551	4138	4642
30.3333	3917	3987	3534	3967	3927	3806	3907	3725	5951	5286	5749	5689	5286	5055	6182	6857	3685	3484	3816	3554	3756	3534	3705	3494	4934		4501	4803	4742	4481	4692
30.6667	3977	4199	3625	4058	4108	3977	3957	3846	6172	5669	6031	5941	5558	5306	6202	7068	3826	3564	3786	3715	3927	3705	3776	3635	5044		4642	4974	4783	4521	4893
31	4088	4340	3665	4199	4148	4148	4007	4249	6243	5437	6212	6152	5548	5286	6394	6998	3826	3836	3957	3907	3826	3846	4028	3595	5155		4924	5095	4984	4783	5085
31.3333	4179	4773	3877	4360	4259	4320	4420	4118	6504	5800	6192	6283	5779	5608	6555	7300	4068	3957	4169	3756	3937	3877	4028	3967	5256		5024	5065	4893	4722	4904
31.6667	4380	4722	3977	4652	4380	4430	4531	4340	6404	5830	6494	6384	6031	5699	6484	7300	4209	4158	4179	4179	4189	3897	4249	4048	5508		5105	5206	5236	5075	5044
32	4521	4934	4229	4561	4531	4853	4682	4521	6645	6011	6655	6615	6021	5739	6696	7411	4330	4279	4390	4309	4219	4239	4410	4340	5598		5165	5528	5175	5306	5216
32.3333	4662	5206	4229	4853	4732	4883	5185	4682	6847	6424	6766	6665	6122	5920	6917	7652	4672	4320	4672	4370	4561	4299	4632	4330	5659		5377	5618	5759	5165	5548
32.6667	4803	5236	4370	5125	4934	5185	4954	4531	6766	6283	6796	6827	6293	5991	6816	7733	4702	4612	4843	4692	4551	4511	4763	4491	6011		5477	5820	5508	5316	5568
33	4914	5679	4642	5276	5014	5347	5175	4944	6998	6514	6988	6927	6504	6122	7088	7884	4883	4793	4763	4763	4833	4692	4742	4521	6122		5709	5930	5628	5638	5790
33.3333	5195	5810	4914	5367	5266	5457	5357	4954	7300	6484	6988	6968	6686	6263	7008	7944	4924	4773	5065	4833	4954	4813	5085	4773	6192		5769	6041	5749	5578	5920
33.6667	5306	5790	4863	5568	5377	5659	5487	4883	7300	6545	6988	7008	6665	6545	7169	8025	5055	5095	5216	5105	5125	4984	5155	4984	6404		5951	6263	6082	5810	6051
34	5457	6041	4954	5659	5709	6001	5558	5206	7431	6645	7229	7249	6827	6595	7360	8015	5206	5044	5407	5206	5306	5055	5306	5034	6303		6021	6504	6222	5890	6162
34.3333	5679	5991	5135	5679	5669	5971	5800	5417	7602	6756	7340	7239	6756	6615	7400	8015	5417	5206	5578	5367	5236	5226	5447	4984	6645		6172	6323	6263	6011	6313
34.6667	5820	6031	5306	5800	5941	6122	5870	5699	7511	7129	7290	7350	6998	6625	7562	8266	5437	5508	5699	5467	5518	5367	5558	5437	6766		6212	6595	6394	6253	6434
35	5890	6303	5306	5961	5900	6162	6051	5689	7833	6998	7471	7330	7038	6847	7541	8065	5769	5548	5920	5538	5729	5407	5759	5487	6686		6514	6585	6414	6474	6746
35.3333	6092	6333	5588	6011	6122	6424	6373	5769	7743	7008	7501	7400	7179	7008	7541	8246	5800	5689	5941	5699	5749	5518	5719	5508	6978		6504	6716	6504	6323	6686
35.6667	6212	6645	5447	6273	6132	6595	6142	5840	7954	7088	7582	7350	7350	6978	7995	8256	5759	5840	6192	5759	6122	5719	5830	5578	7169		6776	6847	6686	6575	6806
36	6394	6726	5830	6333	6363	6665	6384	5951	7843	7048	7672	7531	7199	7119	7692	8186	5850	6011	6233	5941	6011	5840	5941	5790	7159		6786	7058	6676	6565	6998
36.3333	6494	6585	5749	6353	6343	6786	6353	5941	7783	7149	7602	8005	7249	7119	7713	8508	5689	6222	6192	5830	6112	5790	6061	5810	7280		6867	7008	7078	6766	6907
36.6667	6414	6837	5850	6414	6343	6585	6525	6031	8276	7249	7662	7672	7169	7310	7773	8669	5961	6142	6343	6102	6092	6001	5900	5991	7350		6756	7108	6877	6827	6917
37	6494	6927	5910	6545	6363	6847	6504	6122	8105	7290	7813	7662	7360	7280	7964	8568	6092	6112	6384	6263	6373	6172	6102	6243	7239		6968	7270	6816	6786	7139
37.3333	6535	6816	6051	6625	6555	6736	6494	6152	8196	7249	7551	7703	7340	7149	8105	8740	5920	6283	6504	6082	6444	6142	6283	6021	7320		7471	7008	6957	6947	7270
37.6667	6494	6857	5941	6585	6484	6907	6676	6333	7924	7370	7572	7521	7078	7058	7984	8750	5910	6343	6585	6152	6414	6162	6414	6071	7340		6988	7149	7078	6796	7350
38	6645	7028	5749	6565	6514	7028	6545	6283	8035	7421	7713	7672	7260	7451	8105	8659	6001	6293	6545	6283	6333	5991	6283	6283	7572		7129	7078	7098	7068	7280
38.3333	6736	7038	6041	6706	6504	7139	6686	6142	8105	7209	7602	7421	7189	7260	8135	8679	5991	6414	6585	6353	6464	6051	6212	6152	7330		7159	6907	6917	6847	7119
38.6667	6504	6887	6182	6696	6615	6806	6776	6333	8065	7239	7511	7501	7149	7048	8025	8840	6192	6212	6575	6343	6484	6293	6313	6122	7340		6927	7088	7018	6907	6998
39	6716	6746	6112	6635	6373	7129	6676	6142	7934	7088	7280	7300	7199	7229	7944	8679	6132	6293	6504	6152	6424	6283	6253	6384	7370		7260	7008	6947	6766	7078
39.3333	6756	6847	6041	6645	6696	6937	6736	6293	7823	7260	7290	7098	6937	6907	7914	8740	5961	6343	6736	6303	6535	6273	6333	6414	7350		6917	6665	7018	6595	6957
39.6667	6676	7068	5850	6333	6353	6937	6514	6273	7713	6957	7068	6998	6877	6917	7914	8699	6021	6192	6655	6233	6263	6102	6283	6172	7340		6706	6615	6786	6857	7008
40	6575	7098	6112	6323	6535	6978	6474	6112	7421	6806	6937	6746	6545	6806	7874	8458	5941	6424	6625	6323	6323	6142	6263	6243	7249		6827	6625	6776	6595	7088
40.3333	6726	6776	6071	6414	6343	6917	6404	6152	7159	6665	6655	6686	6434	6525	7753	8478	5739	6192	6525	6233	6353	6293	6182	6222	6988		6686	6384	6565	6263	6716
40.6667	6776	6655	6041	6424	6082	6776	6424	6132	7028	6585	6565	6424	6172	6444	7511	8307	5790	6373	6474	6082	6303	6122	6051	6142	6877		6525	6333	6414	6343	6484
41	6394	6796	5910	6082	6162	6796	6394	6071	6686	6253	6092	6233	5961	6132	7260	8156	5840	6152	6514	5941	6293	6011	6152	6253	6625		6444	6031	6112	6122	6605
41.3333	6555	6706	5810	6283	6051	6776	6333	5820	6696	5971	5880	5930	5608	5951	7058	7833	5608	6132	6172	5971	6071	6122	6082	6082	6545		6071	5840	6021	6263	6434
41.6667	6353	6313	5790	6132	5981	6665	6182	5649	6625	5709	5447	5578	5538	5810	6816	7461	5477	6112	6102	5941	5981	5920	5739	6092	6454		6071	5739	5920	5769	6122
42	6263	6283	5679	5840	5769	6535	6092	5487	5991	5508	5628	5276	5145	5427	6555	7189	5377	6031	6152	5800	5850	5860	5729	5961	6414		5669	5508	5679	5578	5900
42.3333	6031	6132	5659	5739	5749	6504	5830	5407	5941	5286	5085	5044	4964	5044	6333	6816	5226	5810	5890	5578	5649	5779	5669	5920	6082		5638	5105	5608	5367	5779
42.6667	5930	6021	5357	5598	5618	6222	5890	5498	5659	5075	4783	4783	4803	5034	6061	6837	5044	5830	5981	5588	5709	5669	5518	5699	5890		5236	5175	5216	5246	5487
43	5941	5971	5437	5357	5538	6132	5508	5185	5477	4732	4652	4612	4440	4712	5729	6363	5004	5618	5810	5407	5568	5498	5286	5900	5649		5135	4813	5085	5065	5185
43.3333	5810	5779	5014	5195	5357	6031	5719	5004	5206	4360	4340	4481	4299	4430	5508	6082	4712	5407	5487	5296	5498	5467	5246	5538	5498		5105	4662	4873	4944	4944
43.6667	5638	5467	5044	5135	5236	5961	5336	4863	4682	4148	4007	4118	4088	4299	5105	5850	4752	5316	5568	5195	5246	5115	5004	5276	5286		4652	4269	4612	4591	4823
44	5618	5487	4752	4833	5014	5800	5195	4632	4571	3846	3746	3846	3766	4007	4893	5477	4460	5095	5326	5145	5286	5125	4893	5467	5075		4561	4269	4561	4471	4410
44.3333	5296	5195	4712	4793	4944	5659	5085	4581	4320	3715	3554	3605	3564	3846	4491	5246	4440	5065	5216	5105	5044	5044	4793	5206	4773		4239	4058	4279	4279	4471
44.6667	5175	5004	4642	4742	4783	5256	4904	4541	4128	3423	3383	3413	3393	3675	4370	5055	4219	4873	4994	4803	4954	4873	4652	4974	4732		4088	3917	3917	4078	4219
45	4984	4893	4491	4551	4591	5115	4511	4179	3947	3323	3413	3242	3323	3343	4229	4702	3877	4732	4954	4732	4803	4571	4370	4752	4390		4028	3635	3977	3705	4017
45.3333	4924	4763	4269	4360	4370	5024	4471	4148	3685	3091	2799	3081	2991	3091	3897	4541	3907	4571	4642	4471	4420	4471	4249	4763	4269		3786	3534	3715	3715	3816
45.6667	4702	4531	4128	4511	4209	5014	4531	3917	3605	2900	2880	2910	2950	2940	3846	4289	3725	4591	4471	4350	4571	4450	4118	4430	4068		3504	3393	3454	3464	3856
46	4652	4491	3997	3967	4098	4823	4148	3897	3333	2769	2739	2719	2699	2729	3454	3887	3595	4158	4370	4209	4249	3987	3947	4320	3977		3534	3212	3494	3333	3484
46.3333	4420	4390	3816	3937	3987	4732	4138	3635	3162	2719	2658	2688	2608	2779	3444	3655	3494	4007	4289	3957	4189	4118	3846	4299	3806		3252	2970	3172	3363	3403
46.6667	4158	4189	3786	3736	3725	4370	4028	3574	3031	2588	2547	2507	2527	2719	3363	3675	3293	4048	4209	3846	3947	3927	3635	4249	3605		3172	2940	3111	3131	3353
47	4048	4028	3595	3534	3574	4450	3947	3303	3121	2608	2407	2527	2437	2930	3091	3434	3313	3695	3826	3736	3927	3816	3534	3947	3514		3182	2880	2980	3031	3262
47.3333	4118	4038	3363	3393	3333	4279	3685	3212	2970	2477	2376	2356	2386	2537	3021	3272	3061	3705	3776	3635	3786	3695	3333	3756	3514		3091	2759	2910	2960	3272
47.6667	3887	3705	3262	3444	3484	4148	3725	3121	2950	2346	2286	2235	2266	2487	2960	3272	2930	3454	3615	3524	3635	3554	3353	3856	3494		3011	2769	2900	2991	3192
48	3846	3625	3383	3242	3131	3937	3454	3101	2819	2286	2407	2276	2235	2396	2890	3192	2890	3675	3645	3454	3504	3444	3252	3625	3182		2799	2739	2789	2779	2930
48.3333	3625	3625	3121	3131	3222	3846	3282	2950	2799	2407	2316	2386	2306	2336	2970	3152	2739	3524	3554	3444	3373	3403	3142	3484	3182		2900	2719	2638	2638	2980
48.6667	3524	3524	3101	3162	3111	3746	3272	2910	2850	2225	2356	2266	2326	2396	2709	3081	2739	3403	3534	3343	3222	3323	3182	3343	3222		2719	2588	2729	2668	3021
49	3444	3454	2890	3041	3051	3655	3061	2779	2719	2195	2346	2336	2165	2407	2719	3182	2618	3262	3343	3111	3252	3192	2991	3423	3021		2638	2668	2527	2668	3001
49.3333	3242	3222	2880	2880	2870	3585	3051	2789	2900	2175	2386	2266	2487	2356	2809	3142	2658	3091	3534	3142	3152	3131	2880	3444	3081		2709	2709	2517	2517	2910
49.6667	3333	3303	2890	2900	2819	3464	3101	2769	2709	2286	2276	2437	2396	2195	2678	3202	2588	2991	3252	3011	3041	3162	2920	3242	3001		2709	2648	2628	2497	2819
50	3222	3121	2890	2789	2940	3464	2940	2699	2809	2336	2517	2437	2477	2396	2819	3061	2578	3031	3212	3021	3121	3121	2870	3323	3011		2648	2588	2527	2507	2950
50.3333	3353	3051	2578	2860	2779	3444	3081	2668	3303	2467	2527	2507	2537	2396	2970	3252	2588	3011	3192	2940	3031	2910	2678	3172	3333		2598	2558	2668	2558	2991
50.6667	3061	3192	2598	2819	2739	3363	3041	2578	3101	2366	2699	2558	2628	2568	2829	3192	2477	2769	3081	2860	2980	2890	2991	3041	2910		2658	2467	2578	2457	2870
51	2960	2890	2638	2648	2749	3333	3031	2618	3131	2497	2678	2638	2729	2598	3001	3192	2517	2860	3081	2930	3061	3121	2678	3192	3152		2688	2578	2729	2527	2789
51.3333	2860	2960	2850	2809	2678	3212	2900	2678	3121	2537	2759	2860	2900	2709	2890	3363	2437	2960	3131	2940	3011	2860	2850	3252	3091		2739	2779	2709	2598	2910
51.6667	3111	3061	2598	2598	2699	3162	2850	2578	3182	2779	2860	2940	2819	2920	3313	3343	2447	2870	3142	2890	2960	3071	2749	3071	3162		2839	2850	2819	2860	3031
52	3101	3031	2749	2658	2759	3282	2920	2699	3544	2839	3031	3131	3202	2900	3343	3615	2457	2900	3071	2850	3071	2819	2910	3202	3202		2860	2809	2880	2739	3202
52.3333	3031	3061	2678	2759	2779	3323	3131	2779	3484	2920	3212	3121	3152	3182	3383	3645	2286	2900	3071	2910	3051	3041	2829	3131	3282		3031	2870	2980	2678	3252
52.6667	3192	3011	2759	2850	2829	3303	3011	2719	3685	3001	3303	3373	3474	3282	3524	3806	2527	2980	3162	2860	3011	3011	2779	3101	3504		3172	3051	2991	3011	3282
53	3242	3051	2759	2809	2970	3252	3021	2709	3866	3152	3544	3554	3544	3363	3756	3977	2487	2930	3162	2940	2950	3051	2829	3121	3574		3172	3252	3131	2960	3282
53.3333	3031	3282	2658	2769	2940	3282	3121	2769	3806	3152	3554	3635	3544	3444	3806	4199	2507	2950	3202	2930	3172	3172	2910	3192	3434		3212	3172	3162	2890	3343
53.6667	3272	3131	2668	2960	2950	3434	3131	2809	3977	3474	3816	3655	3685	3564	3977	4320	2688	3101	3333	3101	3061	3142	3111	3333	3776		3434	3373	3303	3101	3474
54	3152	3182	2839	2890	3071	3554	3293	2870	4078	3554	3806	3967	3796	3715	3957	4460	2608	3162	3293	3142	3142	3172	3011	3303	3514		3343	3403	3222	3242	3725
54.3333	3343	3293	2870	2991	2940	3434	3242	2980	4501	3585	4068	4048	4028	3836	4309	4803	2819	3041	3262	3111	3222	3121	3202	3353	3736		3544	3504	3403	3363	3725
54.6667	3343	3524	2809	3131	3152	3645	3282	3031	4491	3746	4158	4209	4098	4058	4440	4672	2769	3282	3343	3212	3313	3252	3333	3413	3846		3595	3695	3544	3293	3897
55	3423	3504	2900	3232	3101	3595	3423	3011	4692	3977	4289	4239	4360	4017	4632	4813	2779	3303	3413	3313	3454	3323	3212	3605	4058		3715	3725	3675	3484	3987
55.3333	3272	3524	2960	3252	3192	3645	3615	3202	4793	4038	4450	4581	4360	4259	4732	4954	2910	3252	3705	3373	3434	3212	3262	3635	4058		3826	3836	3796	3625	4229
55.6667	3373	3675	3121	3212	3172	3725	3665	3081	4773	4088	4420	4601	4511	4289	4813	5195	3021	3262	3645	3293	3564	3383	3514	3705	4148		3957	3947	3917	3615	4410
56	3484	3675	3111	3464	3393	3927	3756	3383	4843	4299	4672	4672	4652	4531	4984	5467	3131	3262	3786	3564	3464	3504	3403	3615	4289		3866	4148	4068	3665	4471
56.3333	3695	3887	3212	4511	3363	3927	4017	3413	4954	4350	4833	4863	4813	4612	5115	5498	3142	3464	3736	3554	3675	3534	3786	3836	4340		4169	4209	3937	3866	4591
56.6667	3705	3746	3252	3464	3645	4007	3675	3464	5216	4531	4883	5034	4863	4843	5326	5638	3212	3524	3846	3776	3806	3736	3846	4017	4420		4209	4269	4048	4048	4571
57	3756	4179	3434	3736	3635	4229	4179	3605	5417	4481	5065	5044	4853	4843	5347	5628	3293	3695	3897	3695	3887	3887	3977	3947	4581		4249	4410	4108	4028	4853
57.3333	3846	4179	3635	3514	3766	4249	4088	3625	5578	4702	5115	5216	5246	4964	5487	5679	3423	3796	4088	3977	4017	3897	4038	4128	4652		4420	4571	4219	4028	4813
57.6667	3897	4299	3635	3836	3977	4471	4169	3675	5498	4712	5095	5316	5296	5125	5377	5900	3534	3957	4158	3997	4148	3927	4199	4259	4823		4531	4491	4390	4299	4924
58	4007	4269	3725	3927	3907	4511	4189	3877	5487	4994	5457	5397	5377	5105	5689	6021	3544	3887	4209	3987	4068	4017	4199	4309	4863		4672	4813	4430	4259	5085
58.3333	4108	4299	3725	4158	4078	4440	4350	3887	5729	4823	5347	5427	5437	5105	5800	6233	3685	4007	4239	4017	4169	4128	4309	4460	4954		4742	4601	4692	4209	5014
58.6667	4239	4420	3786	4118	4007	4662	4279	3856	5608	5336	5377	5347	5407	5185	5840	6051	3645	4249	4481	4179	4400	4038	4219	4340	5024		4601	4843	4662	4511	5175
59	4209	4742	3866	4169	3967	4752	4551	3997	5628	4793	5397	5578	5528	5306	5951	6041	3887	4199	4591	4249	4471	4169	4561	4541	5044		4652	4914	4581	4430	5216
59.3333	4309	4732	3987	4239	4148	4742	4712	4068	5840	5034	5649	5729	5447	5286	5910	6373	3816	4209	4652	4299	4460	4420	4511	4491	4954		4853	4833	4692	4601	5256
59.6667	4370	4853	4028	4289	4179	4873	4571	4158	5820	5085	5477	5649	5437	5508	6001	6535	3796	4370	4632	4259	4632	4501	4491	4813	5216		4914	5075	4722	4541	5447
60	4632	4813	4058	4320	4118	5075	4904	4128	5900	5175	5457	5568	5568	5548	5850	6172	4078	4430	4531	4259	4672	4491	4692	4702	5296		4893	4984	4692	4662	5558
60.3333	4420	4883	4068	4460	4299	4763	4783	4269	5840	5044	5588	5508	5669	5407	6011	6353	4048	4390	4783	4320	4702	4521	4652	4652	5195		4783	5055	4763	4642	5357
60.6667	4511	5034	4108	4309	4219	4924	4863	4289	5628	5024	5407	5427	5286	5276	5961	6233	3967	4471	4732	4491	4581	4561	4682	4702	5085		4873	4873	4763	4672	5357
61	4551	4984	4007	4551	4501	4883	4974	4229	5729	4984	5276	5518	5498	5336	5941	6373	4058	4450	4672	4642	4692	4561	4622	4692	5216		4904	4853	4652	4420	5618
61.3333	4561	5034	4078	4511	4199	5024	5004	4350	5961	4944	5377	5336	5578	5427	5941	6263	4108	4642	4793	4682	4964	4551	4642	4773	5195		4944	4914	4873	4601	5669
61.6667	4581	4984	4219	4481	4420	4984	4994	4179	5548	4914	5457	5306	5477	5236	6041	6373	4058	4571	4752	4561	4914	4632	4833	4964	5216		4853	4934	4773	4612	5387
62	4622	5155	4340	4471	4652	5024	5024	4320	5568	4783	5226	5316	5306	5286	5759	6313	4179	4642	4944	4793	5014	4702	4702	5135	5246		4934	4843	4652	4652	5538
62.3333	4702	4944	4118	4450	4400	5004	5165	4420	5578	4853	5286	5296	5145	5296	5790	6162	4038	4642	4833	4581	4752	4732	4652	4833	5266		4994	4752	4783	4551	5417
62.6667	4571	5034	4249	4551	4360	5226	5256	4350	5427	4662	5115	5135	5357	5195	5628	6172	4138	4652	4763	4813	4924	4732	4742	4893	5105		4813	4863	4904	4601	5357
63	4692	5085	4209	4591	4501	5115	5075	4390	5477	4853	5145	5206	5105	4994	5377	6031	4320	4732	4752	4642	4783	4873	4632	4954	5165		4974	4742	4591	4481	5498
63.3333	4682	5216	4249	4521	4450	5165	5075	4289	5246	4652	4994	5125	5095	5065	5850	6011	4128	4773	4873	4843	4873	4904	4662	4924	5185		4672	4783	4632	4601	5558
63.6667	4632	4873	4098	4622	4380	5105	5085	4491	5216	4551	4954	4843	5195	4994	5518	5810	4169	4601	4823	4692	4924	4702	4763	4863	5024		4742	4541	4622	4501	5487
64	4893	4974	4299	4400	4561	5236	5095	4330	5226	4450	4692	4803	4823	4752	5578	5659	4148	4601	4752	4662	4883	4672	4581	4863	4954		4531	4601	4511	4460	5508
64.3333	4561	5085	4088	4501	4400	5075	5024	4299	4944	4340	4551	4843	4904	4763	5266	5749	4078	4632	4622	4722	4752	4571	4742	4934	4893		4430	4521	4561	4420	5467
64.6667	4551	5548	4309	4591	4219	4944	5024	4259	5004	4400	4692	4601	4833	4904	5276	5477	4068	4662	4752	4581	4863	4612	4571	4793	4823		4591	4491	4450	4209	5437
65	4561	4994	4108	4450	4309	5125	5135	4229	4934	4299	4571	4410	4752	4551	5246	5558	4017	4652	4702	4581	4722	4591	4732	4924	5034		4460	4370	4420	4340	5236
65.3333	4450	4793	4038	4420	4128	5085	5155	4179	4712	4108	4501	4279	4561	4450	5115	5226	3967	4813	4642	4340	4803	4511	4692	4853	4652		4309	4420	4098	4299	5135
65.6667	4551	4873	4108	4460	4189	4783	4974	4199	4581	4048	4189	4330	4541	4491	4752	5095	3977	4692	4591	4551	4803	4612	4521	4692	4632		4229	4128	4169	3987	5367
66	4400	4752	4128	4380	4068	4813	5075	3997	4521	3826	4219	4219	4199	4430	4873	4984	3967	4501	4591	4430	4682	4561	4591	4732	4551		4350	4259	4028	4078	4893
66.3333	4511	4612	4068	4491	4108	4813	4702	4068	4601	3725	4088	3987	4199	4199	4652	5135	3806	4541	4672	4521	4581	4581	4491	4732	4471		4058	4108	4058	3967	4773
66.6667	4360	4481	4118	4148	4028	4914	4914	4098	4239	3756	3987	3967	4219	4098	4450	4843	3725	4601	4571	4350	4622	4430	4340	4793	4531		4068	4138	3947	3705	4853
67	4269	4662	3776	4058	3927	4692	4974	4007	4179	3454	3796	3907	4158	3957	4460	4773	3816	4410	4481	4430	4491	4309	4390	4642	4360		3917	4007	3977	3746	4752
67.3333	4340	4571	3776	3967	3806	4601	4763	3887	4169	3403	3796	3756	3776	3957	4330	4591	3856	4551	4299	4179	4410	4450	4269	4471	4128		3806	3836	3786	3736	4581
67.6667	4370	4320	3856	3997	3826	4491	4632	3685	3947	3423	3574	3423	3675	3786	4078	4289	3665	4340	4410	4038	4420	4199	4158	4380	4088		3816	3645	3756	3705	4450
68	4098	4249	3766	4007	3816	4541	4400	3776	3776	3121	3504	3504	3585	3625	4158	4199	3585	4169	4148	4209	4350	4118	4199	4370	3957		3564	3725	3645	3534	4299
68.3333	4088	4330	3746	4017	3665	4481	4612	3705	3685	3111	3363	3293	3574	3635	4098	4299	3635	4219	4209	4048	4169	4259	4128	4269	4038		3524	3574	3474	3544	4209
68.6667	3947	4320	3655	3766	3746	4390	4783	3736	3685	3021	3343	3423	3554	3484	3866	4098	3595	4118	4007	4128	4148	4017	4128	4320	3766		3595	3474	3313	3272	4219
69	4088	4128	3554	3725	3625	4239	4491	3645	3464	3011	3182	3363	3343	3595	3695	3917	3413	4118	4118	3957	4138	3796	4007	4350	3887		3484	3353	3454	3172	4128
69.3333	3856	4158	3554	3826	3454	4309	4460	3585	3645	2890	3222	3101	3212	3363	3605	3736	3323	4128	4038	3957	4098	3796	3846	4269	3776		3413	3484	3383	3222	4199
69.6667	3887	4068	3474	3534	3605	4058	4189	3423	3293	2779	3011	3182	3081	3363	3444	3816	3413	4028	3846	3725	3967	3907	3927	3987	3695		3293	3373	3272	3111	4028
70	3685	4007	3494	3454	3363	3917	4128	3413	3282	2880	3091	3001	3041	2970	3444	3635	3232	3816	4017	3675	3977	3786	3766	3917	3484		3051	3242	3142	3172	4108
70.3333	3635	3856	3494	3444	3303	4048	4199	3212	3212	2598	3303	2991	3051	2890	3222	3494	3282	3806	3665	3705	3715	3665	3534	3826	3524		3232	3031	3081	2930	3907
70.6667	3675	3685	3282	3323	3363	3957	4068	3242	3011	2638	2920	2870	3041	2900	3282	3323	3061	3645	3595	3554	3655	3605	3736	3887	3333		3061	3001	2910	2991	3937
71	3353	3464	3222	3162	3202	3756	3846	3242	2860	2497	2880	2688	2789	2839	3252	3303	2950	3534	3544	3564	3595	3585	3464	3786	3323		3011	3071	2809	2779	4017
71.3333	3282	3393	3131	3293	3242	3786	3907	3091	3413	2336	2688	2648	2860	2648	3091	3202	3011	3615	3514	3615	3544	3494	3363	3585	3393		2890	2930	2699	2850	3887
71.6667	3282	3423	3061	3162	2950	3725	3736	3152	2809	2477	2588	2608	2658	2839	3041	3051	2950	3524	3484	3434	3444	3413	3403	3685	3232		2799	2900	2779	2658	3725
72	3262	3464	2860	3111	2960	3413	3685	3001	2719	2296	2537	2638	2779	2547	3081	3111	2819	3413	3363	3242	3524	3423	3323	3585	3121		2839	2920	2709	2648	3695
72.3333	3051	3262	2900	3051	2860	3504	3806	2890	2749	2276	2648	2517	2699	2547	2910	2930	2809	3484	3323	3121	3343	3262	3232	3514	3262		2769	2598	2699	2699	3585
72.6667	3091	3262	2890	3001	2850	3413	3625	2860	2688	2306	2568	2517	2628	2608	2900	2860	2699	3363	3242	3131	3343	3252	3202	3504	3091		2678	2789	2547	2487	3544
73	3061	3252	2709	2920	2769	3423	3615	2789	2628	2155	2517	2497	2537	2618	2930	3091	2598	3212	3212	3071	3232	3212	3021	3403	2900		2678	2719	2558	2437	3816
73.3333	3101	3363	2779	2860	2729	3293	3544	2809	2527	2135	2437	2467	2447	2427	2688	2719	2628	3454	3121	3242	3192	3192	3031	3343	2850		2598	2668	2668	2396	3685
73.6667	2900	3081	2709	2779	2678	3101	3403	2668	2517	2125	2487	2598	2588	2407	2709	2839	2386	3303	3272	3121	3152	3041	2880	3202	2910		2598	2709	2467	2578	3514
74	3031	2910	2628	2779	2588	3131	3373	2568	2457	2235	2346	2326	2437	2467	2658	2719	2709	3182	3071	2900	3121	3011	2880	3182	2960		2658	2759	2568	2306	3554
74.3333	2890	3011	2568	2779	2568	3091	3494	2688	2618	2104	2437	2396	2407	2417	2628	2729	2437	3242	3081	3051	3202	2920	2910	3353	2900		2588	2678	2396	2507	3212
74.6667	2789	2970	2517	2668	2558	3001	3323	2678	2618	2205	2417	2457	2618	2306	2688	2598	2517	3111	2920	2930	3031	2991	2910	3222	2930		2598	2487	2386	2336	3534
75	2819	2890	2598	2558	2537	3041	3333	2547	2517	2084	2568	2517	2457	2457	2809	2779	2467	3172	3051	2829	3021	2940	2809	3071	2819		2447	2497	2487	2497	3393
75.3333	2769	2739	2517	2729	2638	2960	3131	2638	2547	2135	2467	2578	2558	2497	2789	2749	2366	3011	2839	2759	2910	2980	2850	3011	2910		2537	2688	2467	2487	3252
75.6667	2699	2819	2578	2638	2366	2970	3212	2507	2648	2054	2537	2487	2467	2457	2739	2729	2346	3061	2980	2789	2920	3031	2910	3111	2910		2568	2668	2457	2235	3333
76	2749	2789	2457	2598	2467	2850	3142	2578	2628	2185	2598	2487	2628	2537	2809	2779	2316	3021	2850	2860	3061	2960	2880	3182	2819		2477	2547	2407	2356	3363
76.3333	2759	2870	2457	2537	2376	2819	3252	2537	2658	2195	2447	2608	2457	2396	2699	2678	2346	2900	2870	2850	2980	2860	2850	3111	2920		2588	2638	2558	2396	3262
76.6667	2638	2799	2527	2678	2507	2759	3111	2497	2588	2235	2648	2618	2568	2487	2578	2688	2366	2870	2819	2779	2819	2850	2779	3081	2809		2517	2688	2568	2366	3313
77	2648	2829	2467	2547	2417	2880	3202	2417	2638	2245	2699	2558	2699	2618	2719	2850	2306	2890	2870	2900	2930	2920	2880	3121	2809		2547	2568	2517	2427	3323
77.3333	2688	2850	2346	2699	2507	2688	3182	2407	2678	2175	2507	2658	2598	2598	2658	2819	2396	2850	2900	2850	3041	2860	2799	3152	2860		2618	2699	2598	2245	3383
77.6667	2769	2839	2326	2527	2477	2819	3091	2467	2608	2286	2678	2739	2618	2598	2699	2880	2306	2900	2920	2850	2970	2789	2829	3021	2970		2608	2759	2467	2467	3564
78	2638	2789	2417	2648	2487	2749	3142	2477	2729	2346	2759	2699	2749	2608	2779	2769	2346	2839	2890	2910	2950	2829	2870	3031	2880		2638	2779	2618	2477	3534
78.3333	2618	2819	2558	2507	2417	2839	3041	2457	2648	2266	2598	2688	2769	2658	2829	2688	2386	2900	2759	2819	2940	2799	2860	3101	2910		2658	2860	2497	2447	3464
78.6667	2648	2829	2507	2598	2427	2860	3152	2366	2910	2215	2799	2809	2648	2729	2850	2789	2356	3021	2970	2809	2991	2870	2870	3021	2960		2789	2850	2588	2376	3544
79	2588	2709	2547	2779	2427	2880	3131	2628	2749	2286	2688	2850	2789	2789	2910	2829	2477	2991	2950	2910	3031	2819	3071	2970	2960		2729	2749	2638	2497	3605
79.3333	2739	2960	2497	2719	2417	2839	3121	2507	2799	2386	2890	2880	2809	2839	2950	2789	2336	3071	2839	2910	2980	2860	3041	3111	3041		2678	2890	2668	2537	3252
79.6667	2688	2910	2417	2709	2316	2769	3041	2558	2930	2487	2930	2890	2819	2779	2860	2930	2266	3001	2900	2819	3081	2970	3131	2940	2930		2759	2819	2578	2648	3464
80	2759	2829	2467	2668	2507	3011	3011	2447	3041	2467	2769	2910	2839	2799	3041	2960	2407	3001	2850	2799	2970	2930	2910	3121	2970		2860	2759	2618	2527	3393
80.3333	2749	2759	2437	2729	2527	2809	3131	2427	2930	2517	2930	2950	2940	2890	2940	2950	2467	2991	3121	2930	3051	3071	2809	3152	3061		2991	2789	2638	2537	3504
80.6667	2658	2850	2568	2688	2507	2900	3333	2547	2860	2568	2900	3051	3051	2789	3121	2970	2487	2980	2950	2860	3011	2850	2910	3232	3192		2910	2839	2719	2648	3615
81	2759	2930	2477	2759	2326	2779	3192	2628	2950	2547	3101	3031	3011	2850	3001	3121	2648	2970	3031	2870	3071	2829	3021	3142	3242		2970	2900	2638	2618	3736
81.3333	2678	2980	2487	2688	2588	2950	3313	2517	3021	2568	3101	3162	2809	2759	3071	3131	2467	3101	3011	2890	3011	3011	2970	3142	3061		2880	2850	2759	2578	3655
81.6667	2870	2900	2658	2920	3041	2890	3202	2618	3111	2628	3031	3162	3061	2890	3152	3121	2537	2991	3051	2910	3152	2910	2950	3262	3192		2890	2980	2769	2568	3605
82	2729	3041	2517	2920	2427	2860	3363	2688	3101	2598	3051	3041	3152	2970	3011	3202	2497	2991	3152	3101	3111	2940	3121	3192	3313		2960	2930	2719	2568	3474
82.3333	2739	3011	2527	2829	2739	3001	3413	2890	3101	2638	3131	3242	3121	2970	3142	3051	2759	3101	3091	2991	3142	2970	3091	3242	3192		2980	3101	2819	2789	3494
82.6667	2900	2789	2578	2819	2547	2829	3413	2678	3041	2598	3061	3131	2960	2920	3091	3222	2668	3242	3192	3011	3212	3202	3232	3293	3192		2870	3142	2829	2719	3484
83	2870	3121	2729	2839	2759	3031	3444	2688	3081	2658	3131	3212	3232	3061	3061	3182	2699	3192	2980	3001	3192	2991	3111	3252	3262		3041	3041	2930	2759	3595
83.3333	2850	3121	2658	2880	2729	2960	3474	2709	3131	2759	3192	3152	3071	3011	3071	3172	2688	3202	3071	3031	3343	3011	3121	3403	3272		2930	3061	2950	2789	3534
83.6667	2970	3031	2568	2920	2668	2950	3393	2839	3172	2678	3182	3152	3162	3011	3202	3343	2648	3343	3222	3212	3222	3021	3051	3242	3172		3021	3162	2960	2719	3635
84	2960	3111	2719	3061	2678	3091	3403	2839	3142	2588	3222	3323	3192	2991	3182	3282	2658	3262	3252	3182	3353	3071	3252	3504	3323		2940	3041	2799	2839	3635
84.3333	2890	2980	2769	2860	2779	3051	3514	2980	3051	2668	3121	3131	3031	3061	3101	3252	2799	3303	3272	3071	3353	3001	3262	3293	3403		2980	3071	2860	2809	3665
84.6667	3001	3152	2598	3212	2870	3101	3534	2759	3192	2729	3202	3212	3212	3061	3091	3373	2809	3222	3121	3182	3131	3232	3252	3494	3343		2900	3061	2819	2850	3766
85	3021	3101	2729	2920	2809	3121	3403	2910	3202	2739	2991	3212	3252	3001	3101	3282	2668	3363	3252	3212	3262	3172	3222	3363	3403		2970	3101	2870	2860	3524
85.3333	2950	3222	2860	2930	2688	3091	3423	2860	3081	2799	3272	3252	3222	3101	3071	3272	2910	3353	3313	3111	3474	3071	3353	3272	3423		3091	3162	2920	2809	3715
85.6667	3051	3192	2759	2980	2759	3242	3544	2839	3262	2588	3282	3212	3121	3192	3101	3353	2779	3111	3313	3152	3313	3303	3282	3434	3293		3051	3293	2970	2799	3574
86	3031	3282	2809	3021	2678	3182	3605	2950	3242	2769	3172	3222	3081	2970	3172	3252	2910	3464	3333	3071	3262	3142	3333	3383	3383		2950	2920	2850	2839	3655
86.3333	2920	3222	2839	3031	2739	3152	3373	2880	3131	2658	3202	3484	2910	3021	3081	3131	2839	3333	3343	3192	3444	3222	3262	3363	3373		2980	3011	2839	2890	3544
86.6667	2960	3242	2870	3101	2829	3081	3434	2719	3262	2719	3182	3192	3121	3011	3091	3172	2809	3333	3363	3272	3262	3111	3212	3393	3242		3051	2970	2920	2829	3524
87	2880	3121	2668	3041	2980	3051	3474	2870	3111	2688	3111	3131	3242	3041	3131	3282	2739	3343	3313	3262	3373	3222	3172	3363	3303		2950	3081	2759	2829	3585
87.3333	2970	3121	2799	2940	2779	3001	3293	2870	3041	2709	3071	3061	2991	2910	3192	3202	2739	3212	3333	3081	3202	3172	3393	3353	3393		3081	3101	2749	2829	3574
87.6667	3011	3152	2910	2900	2829	3172	3282	2970	3071	2578	2980	3011	3051	2880	2970	2980	2809	3323	3444	3101	3192	3272	3222	3413	3403		2940	3071	2809	2819	3242
88	3031	3333	2699	3061	2799	3142	3323	2789	3011	2678	3001	3091	2900	2779	2890	3182	2970	3232	3162	3101	3423	3121	3242	3524	3454		3011	2940	2829	2729	3323
88.3333	3001	3182	2829	2970	2809	3041	3333	2900	3081	2527	3031	2900	3091	2860	2910	2920	2719	3202	3282	3031	3162	3182	3232	3373	3373		2970	3011	2839	2739	3434
88.6667	2960	3021	2769	2980	2850	2900	3142	2829	2850	2598	2769	2930	2950	2759	2839	2991	2829	3172	3393	3121	3413	3172	2991	3262	3172		2900	2991	2658	2719	3282
89	3051	3202	2709	3101	2860	3142	3182	2890	2910	2477	2870	2920	2839	2809	2839	3041	2829	3272	3111	3051	3222	3162	3111	3343	3313		2809	2910	2759	2648	3514
89.3333	3011	3162	2779	2960	2648	3031	3192	2860	2850	2447	2779	2819	2809	2890	2809	2940	2930	3101	3242	2960	3252	3061	3152	3212	3272		2870	2839	2658	2709	3363
89.6667	3142	2960	2819	3011	2739	3111	3212	2759	2789	2507	2809	2779	2648	2699	2779	2870	2759	3121	3313	3212	3262	3111	3303	3142	3162		2930	2779	2729	2588	3293
90	2930	3091	2759	2809	2799	2970	3272	2608	2779	2396	2870	2839	2668	2588	2719	2910	2799	3182	3131	3142	3162	3081	3021	3182	3061		2789	2920	2668	2477	3423
90.3333	3031	3152	2678	2930	2709	3071	3111	2749	2809	2306	2739	2699	2578	2688	2628	2980	2638	3061	3081	2970	3182	3011	3152	3172	3192		2618	2940	2588	2356	3142
90.6667	2940	3061	2739	2749	2809	2910	3041	2588	2658	2256	2618	2588	2729	2749	2709	2819	2668	3172	3313	3111	3121	2910	2950	3152	3121		2779	2709	2658	2608	3101
91	2991	3021	2699	2839	2568	2910	3152	2648	2638	2296	2578	2668	2527	2588	2527	2658	2648	2950	3071	2980	3091	2991	2991	3182	2910		2618	2709	2447	2366	3162
91.3333	2920	2960	2628	2860	2568	2839	3182	2729	2558	2064	2507	2699	2648	2628	2547	2527	2678	3051	3142	3152	3011	2960	3071	3232	2991		2668	3021	2688	2417	3242
91.6667	2890	3001	2648	2819	2467	2870	3282	2578	2517	2235	2507	2648	2366	2396	2376	2668	2618	3061	3021	2970	2960	3001	2900	3111	3031		2598	2699	2467	2386	3101
92	2860	2799	2437	2729	2507	2950	3222	2618	2668	2256	2427	2507	2386	2537	2487	2537	2688	3001	2960	2910	2829	2870	2860	2970	2850		2618	2789	2417	2326	3182
92.3333	2829	3081	2537	2699	2568	2799	3091	2517	2527	2245	2457	2427	2477	2386	2517	2497	2558	2991	2910	2880	2870	2900	2880	3131	2860		2537	2588	2457	2296	3121
92.6667	2739	2819	2497	2598	2417	2890	3061	2537	2558	1974	2437	2487	2266	2256	2346	2578	2558	2910	2980	2829	2930	2910	2900	3061	2960		2588	2638	2326	2084	3121
93	2719	2779	2457	2709	2447	2850	2809	2608	2497	2145	2356	2296	2326	2799	2366	2447	2497	2950	3081	2799	2930	2860	2799	2970	2769		2467	2537	2276	2618	2900
93.3333	2668	2940	2578	2688	2427	2618	2930	2487	2396	2054	2366	2346	2346	2447	2286	2588	2467	2749	2960	2688	2940	2699	2719	2809	2799		2497	2588	2286	2084	2769
93.6667	2729	2739	2487	2678	2386	2608	2970	2336	2356	1974	2336	2336	2245	2427	2256	2457	2588	2900	2860	2729	2809	2638	2739	2920	2799		2467	2336	2316	2175	2839
94	2558	2850	2356	2668	2286	2618	2980	2195	2346	1974	2316	2195	2115	2135	2185	2396	2407	2769	2930	2678	2809	2648	2658	2799	2789		2487	2386	2175	2145	2850
94.3333	2517	2628	2487	2668	2356	2628	2839	2346	2235	2024	2185	2376	2185	2195	2256	2386	2386	2759	2850	2739	2668	2648	2759	2789	2668		2417	2316	2245	2064	2719
94.6667	2558	2598	2276	2547	2266	2517	2779	2457	2195	1964	2135	2235	2024	2135	2074	2427	2346	2910	2759	2658	2729	2558	2638	2699	2618		2296	2417	2296	2074	2789
95	2517	2709	2276	2467	2296	2407	2829	2366	2276	1863	2074	2225	2024	2094	2145	2447	2356	2699	2749	2648	2638	2688	2658	2658	2648		2326	2366	2014	2115	2870
95.3333	2477	2668	2175	2376	2336	2447	2648	2165	2084	1913	2175	2276	2044	1873	2054	2155	2326	2829	2799	2668	2699	2497	2537	2537	2598		2487	2245	2044	2054	2578
95.6667	2477	2507	2175	2376	2326	2497	2699	2165	2125	1802	2074	2276	2004	1964	2044	2205	2316	2578	2618	2648	2598	2467	2608	2688	2467		2306	2427	2054	2135	2648
96	2537	2417	2225	2296	2014	2477	2699	2245	2024	1762	2125	2145	1953	2014	2014	2306	2235	2678	2558	2497	2558	2527	2578	2598	2477		2286	2185	2084	1792	2527
96.3333	2376	2558	2306	2346	2115	2376	2729	2296	2296	1883	2034	2205	1943	1964	1903	2225	2205	2699	2648	2487	2527	2588	2558	2628	2467		2276	2266	2024	1994	2487
96.6667	2326	2447	2215	2316	2044	2386	2628	2145	2155	1772	2034	1994	2024	1953	1994	2024	2155	2578	2578	2547	2547	2477	2588	2558	2356		2125	2195	2094	1994	2618
97	2376	2447	2084	2326	2165	2266	2578	2185	2074	1682	1964	2024	1994	2044	2044	2034	2175	2588	2558	2356	2417	2386	2316	2517	2165		2245	2034	1953	1964	2497
97.3333	2497	2296	2256	2165	2175	2346	2437	2175	2084	1692	2024	2084	1994	2024	1863	1923	2215	2688	2447	2558	2356	2437	2457	2558	2326		2205	2286	1984	2004	2628
97.6667	2286	2437	2115	2225	2054	2266	2407	2064	1974	1802	2145	2004	1964	1964	1933	2074	2155	2467	2568	2447	2376	2346	2386	2598	2396		2104	2064	1873	1843	2286
98	2256	2366	2034	2175	2084	2115	2417	2104	2024	1752	2084	1883	1953	1964	1752	2024	2044	2477	2386	2286	2396	2316	2296	2527	2266		2044	2094	1984	1853	2386
98.3333	2245	2346	2084	2125	2094	2165	2386	2145	1943	1762	1974	2054	1782	1742	1883	1903	1974	2376	2407	2386	2276	2276	2205	2547	2215		1984	2115	1772	1893	2497
98.6667	2205	2145	2064	2125	1943	2145	2376	2125	1933	1591	1853	1984	1782	1752	1833	2014	2155	2457	2396	2467	2205	2296	2205	2487	2396		1913	2054	1843	1762	2155
99	2014	2155	1974	2175	2014	2205	2396	1964	1994	1611	1913	2014	1802	1672	1712	1903	1923	2286	2346	2276	2256	2235	2165	2467	2336		2064	1964	1813	1823	2336
99.3333	2145	2346	1943	2104	1873	2084	2286	1923	2004	1641	1964	1984	1883	1742	1782	1802	2064	2276	2205	2266	2356	2135	2084	2487	2225		1843	1933	1762	1762	2235
99.6667	2034	2205	2135	2195	1813	2074	2235	1853	1893	1581	1933	2064	1712	1823	1883	1893	2004	2225	2346	2245	2256	2165	2044	2326	2286		2024	1913	1802	1843	2225
100	2014	2074	1802	2014	1964	2034	2276	1923	1893	1682	1923	2014	1722	1672	1792	1853	2044	2195	2115	2034	2115	2145	2185	2205	2155		2074	2024	1782	1631	2115
100.333	2205	2115	1833	1994	1873	2054	2185	2024	1903	1591	1883	2064	1792	1682	1752	1843	1873	2225	2135	2195	2256	2245	2245	2235	2235		2004	1853	1823	1802	2084
100.667	2125	2104	1943	1984	2044	1974	2235	1863	1792	1621	1953	2054	1893	1682	1742	1863	1883	2104	2276	2135	2074	2054	2115	2235	2205		2004	2004	1843	1873	2195
101	2104	2195	1974	1923	1843	2014	2286	1863	1883	1661	1943	1903	1974	1742	1732	1742	1923	2024	2386	2235	2094	2084	2074	2266	2175		2004	2064	1813	1772	2155
101.333	1994	2024	1752	2014	1772	2074	2245	1873	1863	1581	1903	1943	1702	1742	1813	1893	1903	2054	2185	2205	2165	2104	2084	2256	2084		2054	1953	1813	1682	2155
101.667	2074	2185	1893	2034	1792	1923	2074	1853	1853	1682	1883	1974	1661	1692	1782	1661	1863	2225	2195	2044	2165	2024	2054	2235	2104		1984	1994	1893	1682	2104
102	2014	2064	1772	2054	1813	1984	2225	1994	1913	1641	1953	2074	1883	1541	1702	1863	1873	2094	2145	2054	2034	2044	1984	2145	2125		2266	1863	1651	1712	2195
102.333	2024	2054	1853	1964	1742	2054	2185	1903	1853	1591	1943	2054	1742	1782	1672	1833	1823	2165	2014	2135	2125	1984	2014	2185	2276		1903	1953	1752	1722	2104
102.667	1953	2074	1722	1863	1752	1964	2125	1802	1742	1611	1762	1943	1682	1651	1782	1792	1923	2084	2115	2155	2014	2034	1964	2175	2044		1863	2014	1732	1631	2185
103	1953	2104	1843	1893	1762	1953	2044	1893	1762	1581	1853	1893	1732	1641	1762	1802	1913	2064	1923	2004	2125	1883	1994	2064	2215		1893	1883	1802	1732	2135
103.333	1863	2195	1692	1833	1782	1843	2104	1752	1853	1712	1883	2115	1792	1672	1752	1923	1853	2024	2084	2115	2155	1964	1923	2125	2024		1913	1943	1682	1712	2115
103.667	1863	1883	1672	1792	1813	1913	2145	1762	1964	1641	1843	2135	1782	1692	1762	1752	1823	2074	2185	2104	1883	2004	1974	2185	1994		1762	1964	1732	1521	2175
104	1883	1964	1802	1792	1782	1802	2084	1833	2034	1581	1943	1994	1782	1752	1752	1883	1782	2104	2115	2064	2014	1994	2014	2115	2266		1964	1923	1893	1742	2256
104.333	1984	1953	1782	1833	1742	1833	2054	1651	2064	1631	1984	2094	1752	1752	1843	1823	1893	2115	2225	2155	2034	1974	2064	2135	2094		2014	1853	1762	1621	2276
104.667	1903	2074	1672	1923	1923	1893	2155	1712	1833	1813	1913	2044	1853	1712	1762	1883	1853	2064	2004	2125	2024	2024	2084	1994	2094		1933	2014	1782	1631	2084
105	1863	2084	1631	1863	1762	1933	2094	1843	1943	1611	1863	2104	1943	1692	1903	1782	1813	2266	2084	2104	1974	2004	1964	2064	2044		1873	1964	1802	1712	1994
105.333	1994	1974	1651	1863	1853	1984	2125	1843	1953	1631	2024	2185	1742	1853	1903	1873	1843	2074	2115	2104	2064	2024	1994	2225	2145		1933	1933	1873	1692	2135
105.667	1974	2084	1792	1964	1853	1883	2024	1823	2054	1742	2034	2125	2256	1863	1903	1923	1883	2195	2064	2155	2205	2104	2024	2104	2326		1974	2004	1863	1833	2135
106	1933	2094	1792	1913	1752	2084	2235	1923	1883	1782	2034	2165	1883	1823	1893	1802	2024	2115	2125	2145	2094	2014	1974	2084	2185		1994	1984	1833	1651	2266
106.333	1873	2064	1943	2064	1802	2034	2145	1953	1953	1722	2014	2346	1893	1792	1752	1843	1833	2044	2094	2125	2044	1984	2004	2115	1984		1933	2004	1843	1722	2054
106.667	1974	2115	1792	2115	1994	2306	2155	1974	1994	1782	2145	2195	1953	1923	1943	1974	1823	2074	2125	2185	2125	2064	2084	2165	2225		1903	1953	1843	1712	2195
107	2014	2104	1873	1964	1802	1903	2145	1853	2054	1853	2145	2195	1762	1883	2094	2034	1883	1994	2195	2004	2125	2004	2145	2135	2205		2034	1984	1833	1792	1974
107.333	1923	2185	1752	2014	1772	2094	2245	1903	2064	1772	2094	2125	1853	1802	1964	1974	1994	2125	2104	2104	2115	2064	2054	2286	2155		1933	2165	1853	1732	1953
107.667	1943	2185	1893	1994	1823	1943	2537	1893	2125	1762	2094	2276	1893	1813	1883	2034	1974	2064	2195	2135	2155	2104	2094	2145	2215		1913	1974	1792	1732	2094
108	2024	2135	1964	1873	1843	1903	2286	1913	1933	1883	1964	2135	1923	1833	2014	1953	1833	2175	2125	2034	2175	1974	2044	2306	2195		2034	1943	1913	1621	2104
108.333	2054	2235	1943	2135	1883	2125	2396	1903	2104	1923	2245	2296	1953	1994	1974	2094	2014	2044	2215	2215	2115	2165	2165	2175	2155		1964	2014	2044	1722	2225
108.667	2084	2256	1883	2004	1943	2104	2356	1913	2205	1994	2195	2336	2084	1893	1994	2054	2044	2366	2165	2235	2185	2034	2376	2276	2245		1974	2104	1903	1853	2145
109	2074	2235	1853	2135	1923	2064	2286	1974	2245	2074	2235	2235	1984	1903	2004	2125	2094	2235	2386	2215	2205	2084	2084	2316	2316		1923	2034	1953	1702	2104
109.333	2135	2165	1863	2215	2115	2135	2235	1903	2104	1953	2205	2215	1933	1853	1923	1974	1923	2195	2155	2235	2064	2115	2135	2256	2346		2014	2145	1974	1682	2104
109.667	2104	2074	1833	2024	2024	1974	2396	1913	2155	1984	2145	2225	1893	1792	1974	2104	1994	2165	2195	2225	2215	2064	2195	2205	2165		1984	2014	1984	1994	2044
110	2084	2185	1994	1984	1792	1964	2376	1853	2276	1752	2094	2286	1953	1984	1893	2115	1923	2235	2135	2115	2195	2115	2115	2396	2175		2135	2205	1893	1772	2145
110.333	2165	2276	1893	2165	1813	2104	2306	1863	2145	2084	2376	2276	2014	1853	1984	1984	2064	2245	2336	2215	2225	2094	2266	2205	2064		2074	2125	2165	1893	2074
110.667	2044	2225	1863	2115	2014	2195	2296	1893	2185	1943	2366	2225	2054	1923	2074	1994	2054	2155	2256	2074	2185	2165	2155	2195	2396		1964	2115	1974	1742	2104
111	2084	2266	2054	2125	1994	2094	2437	1984	2145	1943	2306	2326	2024	1933	1964	2104	1943	2245	2245	2165	2256	2286	2306	2195	2145		1984	2155	1933	1782	2155
111.333	2195	2316	1953	2185	2094	2125	2417	2044	2185	2175	2215	2195	2044	1873	2104	2165	2195	2256	2346	2235	2165	2225	2245	2306	2356		2044	2266	1933	1923	2165
111.667	2125	2306	1933	2165	1943	2245	2427	2074	2225	1893	2407	2346	2034	1994	2084	2125	1964	2336	2266	2245	2215	2165	2346	2225	2296		2125	2245	1984	1883	2034
112	2165	2215	1953	2235	1943	2034	2256	1984	2195	2104	2125	2336	2084	1903	1994	2175	2074	2346	2215	2165	2195	2084	2155	2407	2125		2115	2266	1953	1903	2175
112.333	2225	2155	1943	2094	1853	2165	2417	2014	2175	1833	2115	2326	2044	1883	2014	1974	2064	2316	2276	2225	2256	2064	2104	2326	2195		2104	2135	2034	1802	2094
112.667	1994	2235	1984	2145	2054	2155	2175	2014	2135	2024	2276	2336	2004	2115	2004	2135	2165	2296	2225	2185	1994	2215	2276	2286	2175		2094	2205	1873	1933	2135
113	2165	2437	1964	2185	2084	2225	2376	1923	2215	1964	2256	2427	2064	2034	1843	2054	2235	2225	2256	2195	2286	2175	2235	2276	2165		2054	2155	2094	1923	2084
113.333	2346	2346	2064	2104	1984	2115	2296	1933	2256	2054	2256	2245	2004	2024	2115	2145	2104	2195	2316	2276	2256	2256	2104	2336	2266		2135	2145	1863	1813	2125
113.667	2195	2215	2266	2064	1994	2084	2326	2064	2276	1994	2175	2276	2004	1964	1964	2094	2064	2215	2376	2135	2245	2225	2276	2296	2175		2104	2256	1913	1772	2185
114	2034	2215	2034	2316	2004	2104	2316	1984	2195	1974	2084	2487	2074	1994	2094	2054	2094	2185	2336	2145	2185	2256	2215	2145	2286		2175	2165	1953	1752	2074
114.333	2266	2296	1953	2125	2104	2165	2165	1923	2225	1953	2165	2266	2004	2024	1913	2135	2155	2316	2215	2195	2175	2165	2266	2125	2407		1943	2034	2054	1843	2044
114.667	2135	2336	2064	2024	2115	2175	2396	1933	2276	1923	2135	2306	1873	1933	1974	2054	2135	2215	2175	2145	2195	2245	2185	2245	2225		1943	2044	1923	1903	2185
115	2256	2256	1923	2245	2004	2195	2225	1984	2215	1903	2125	2266	2024	2014	1883	2125	2094	2266	2256	2215	1984	2064	2165	2104	2165		1943	2004	1994	1813	2054
115.333	2235	2316	1994	2084	1994	1943	2195	2145	2064	1873	2195	2155	1883	2084	1923	2084	2235	2235	2235	2084	2034	2064	1984	2276	2235		2125	2054	1923	1782	2104
115.667	2235	2266	1943	2225	1984	2054	2225	1903	2256	1853	2135	2316	1792	1702	1873	2044	2084	2185	2225	2175	2064	2084	2215	2115	2064		2074	2094	1933	1883	2004
116	2115	2175	1873	2104	1923	2064	2296	1873	2115	1853	2084	2235	1953	1994	1913	2044	2014	2064	2074	2245	2205	2054	2094	2145	2135		2084	2034	1853	1762	2094
116.333	2115	2245	2004	2084	1762	2074	2125	1843	2094	1863	1994	2276	1903	1843	2074	1964	2074	2104	2104	1994	2104	2074	2125	2094	2175		2014	2004	1873	1742	2004
116.667	2064	2215	1863	2084	2034	2094	2477	1923	2215	2024	2195	2145	1853	1984	1913	1863	1964	2175	2084	2054	2024	2125	2094	2104	2064		1943	2064	1843	1712	2044
117	2135	2135	1933	2104	1953	2034	2306	1964	2044	1873	2084	2064	1823	1883	1843	2145	1953	2125	2215	2054	1994	2074	2094	2145	2135		1974	1984	1873	1752	2044
117.333	2074	2386	2004	2024	1943	2004	2316	1893	2215	1833	2014	2135	1873	1762	1903	2044	1943	2115	2094	2125	2115	2004	2195	2064	2024		1903	1943	1863	1772	1974
117.667	2074	2094	1772	2064	1863	2094	2064	1923	2054	1772	2094	2074	1802	1933	1903	1903	2064	2034	2155	2125	2074	2044	2094	2084	2034		1863	1964	1742	1732	2074
118	1984	2145	1863	2175	1953	2044	2225	1833	1984	1843	2074	2145	1782	1752	1782	1923	1943	2074	2155	2054	1994	1964	2024	2004	2104		1883	1933	1813	1742	1843
118.333	2054	2245	1823	2034	1873	1964	2135	1813	1984	1742	2074	2064	1762	1732	1953	1873	2024	2115	2125	1974	1953	1984	1913	1873	2064		1913	1893	1813	1782	1943
118.667	2064	2155	1893	1994	1873	1913	2115	1792	2024	1722	2125	2074	1591	1702	1863	1833	1883	2185	2155	1903	1984	1863	2135	2084	1943		1903	2054	1752	1682	1883
119	2014	2074	1903	2024	1873	1953	2074	1913	1873	1712	1953	2024	1722	1843	1883	1823	1943	1994	2044	1943	1903	1903	2054	2074	2064		1873	1953	1813	1682	1853
119.333	2074	2125	1712	2004	1813	2024	2074	1883	1994	1772	2044	2064	1631	1792	1823	1943	2044	2034	2024	1913	1984	2004	1974	2014	2115		1883	1863	1893	1752	1903
119.667	1994	2135	1772	1943	1833	1923	2044	1712	1984	1883	1893	2074	1802	1672	1813	1893	2014	2014	1994	1964	2014	2004	1974	1994	1964		1913	1873	1813	1672	1933
120	2064	1984	1903	1953	1863	1903	2084	1712	1953	1823	1933	2064	1772	1651	1762	1893	1994	1923	1903	1913	2054	2044	1953	2054	2004		1863	2014	1722	1702	1813
120.333	2054	2014	1853	2084	1762	1974	1923	1782	2064	1702	1953	1943	1742	1702	1813	1903	2044	1893	1853	1883	1964	1813	1873	1974	1964		1802	1792	1672	1682	1953
120.667	1994	2064	1742	1943	1772	1792	1964	1813	1913	1591	1843	1883	1782	1712	1863	1893	1843	1903	1913	1752	1883	1833	1964	1913	2024		1813	1792	1802	1611	1712
121	1933	2004	1802	2004	1782	1802	1913	1661	1913	1752	1802	1964	1551	1541	1641	1813	2024	1913	1863	1802	1802	1933	2004	1893	1843		1903	1933	1742	1541	1762
121.333	2014	2004	1782	1903	1641	1853	2004	1772	1893	1732	1923	2014	1682	1672	1873	1782	1974	1873	1702	1923	1853	1813	1943	1742	1873		1853	1813	1661	1551	1833
121.667	1943	1903	1802	1782	1802	1964	1913	1672	1792	1682	1873	1772	1732	1490	1732	1863	1813	1974	1782	1813	1933	1792	1742	1913	2104		1712	1772	1591	1510	1651
122	1792	1913	1692	1853	1621	1923	1933	1742	1893	1661	1974	1933	1651	1591	1702	1813	1732	1903	1893	1732	1893	1762	1752	1943	1823		1903	1813	1762	1480	1873
122.333	1933	1893	1631	1712	1853	1752	1994	1591	1772	1682	1883	1933	1611	1541	1682	1641	1752	1903	1813	1772	1883	1823	1682	1873	1792		1853	1873	1601	1621	1833
122.667	1913	1853	1762	1863	1651	1611	1843	1651	1833	1621	1913	1893	1762	1712	1601	1581	1833	1853	1883	1782	1913	1792	1762	1762	1843		1611	1792	1682	1651	1903
123	1953	1823	1752	1782	1692	1772	1802	1692	1843	1621	1772	2004	1661	1551	1510	1742	1722	1772	1732	1651	1792	1762	1722	1772	1692		1933	1853	1712	1470	1782
123.333	1873	1863	1712	1782	1601	1813	1893	1601	1782	1541	1772	1863	1742	1521	1742	1742	1722	1843	1823	1641	1752	1722	1732	1923	1802		1742	1742	1732	1601	1833
123.667	1702	1883	1601	1853	1661	1661	1833	1601	1772	1651	1762	1843	1611	1591	1702	1702	1692	1883	1853	1692	1682	1823	1641	1762	1762		1722	1752	1661	1641	1732
124	1752	2014	1601	1883	1792	1742	1853	1521	1802	1551	1752	1893	1641	1500	1561	1672	1631	1853	1833	1813	1631	1762	1702	1782	1702		1712	1692	1672	1460	1561
124.333	1893	1772	1722	1672	1601	1802	1933	1631	1742	1521	1702	1813	1621	1742	1631	1682	1682	1722	1762	1672	1722	1762	1772	1823	1752		1631	1802	1490	1551	1722
124.667	1802	1893	1631	1672	1470	1682	1742	1561	1611	1561	1732	1802	1551	1510	1601	1551	1661	1692	1682	1692	1772	1682	1782	1621	1682		1672	1772	1601	1561	1732
125	1672	1813	1641	1551	1601	1722	1823	1591	1712	1591	1782	1833	1651	1601	1551	1601	1782	1772	1712	1672	1732	1682	1682	1813	1732		1601	1813	1510	1440	1672
125.333	1762	1893	1712	1571	1762	1571	1923	1591	1672	1510	1843	1792	1561	1541	1541	1581	1551	1742	1813	1661	1732	1772	1792	1712	1752		1772	1661	2125	1400	1480
125.667	1752	1762	1641	1581	1541	1631	2004	1541	1732	1571	1702	1802	1581	1601	1611	1571	1732	1732	1682	1561	1682	1571	1682	1712	1702		1621	1722	1541	1460	1641
126	1923	1802	1541	1621	1621	1742	1813	1631	1762	1581	1651	1762	1581	1541	1591	1621	1732	1732	1752	1621	1722	1551	1621	1702	1732		1641	1672	1611	1490	1712
126.333	1661	1682	1510	1661	1601	1672	1903	1551	1672	1661	1752	1933	1591	1621	1611	1541	1651	1702	1792	1571	1762	1722	1682	1772	1651		1782	1712	1521	1500	1672
126.667	1863	1863	1722	1661	1531	1641	1813	1541	1732	1591	1722	1853	1490	1460	1500	1541	1762	1792	1692	1591	1641	1621	1631	1782	1722		1591	1651	1571	1460	1742
127	1732	1893	1561	1672	1661	1782	1772	1581	1732	1601	1732	1933	1581	1702	1601	1611	1762	1893	1661	1752	1621	1712	1631	1752	1651		1611	1682	1601	1440	1802
127.333	1752	1802	1712	1712	1641	1752	1813	1611	1661	1641	1722	1863	1541	1541	1782	1591	1712	1722	1722	1661	1762	1661	1863	1752	1772		1581	1661	1571	1460	1702
127.667	1883	1853	1500	1692	1621	1702	1883	1581	1661	1510	1641	1853	1651	1521	1621	1641	1601	1661	1732	1631	1641	1702	1702	1702	1813		1621	1823	1651	1329	1682
128	1802	1762	1672	1833	1500	1702	1823	1611	1651	1531	1813	1943	1581	1591	1510	1601	1752	1601	1591	1621	1631	1672	1702	1521	1702		1551	1722	1692	1410	1762
128.333	1823	1702	1611	1621	1561	1651	1712	1621	1702	1500	1682	1974	1521	1521	1732	1762	1621	1702	1611	1571	1661	1712	1722	1792	1762		1591	1732	1611	1430	1752
128.667	1742	1782	1561	1772	1621	1692	1752	1541	1802	1581	1772	1863	1521	1490	1571	1742	1611	1712	1762	1611	1621	1591	1672	1661	1752		1702	1692	1581	1470	1702
129	1702	1863	1712	1672	1651	1692	1903	1551	1802	1601	1782	1994	1611	1531	1611	1712	1661	1802	1712	1702	1722	1682	1591	1762	1682		1641	1792	1631	1510	1621
129.333	1873	1843	1641	1762	1581	1682	1712	1712	1772	1551	1702	1843	1682	1631	1581	1500	1742	1802	1672	1641	1692	1581	1651	1813	1974		1651	1692	1621	1510	1651
129.667	1823	1752	1601	1692	1641	1762	1923	1510	1732	1762	1792	1933	1571	1561	1651	1651	1621	1742	1712	1772	1661	1722	1571	1661	1823		1611	1631	1551	1500	1712
130	1953	1813	1561	1722	1541	1762	1853	1621	1692	1531	1792	1893	1732	1581	1682	1732	1702	1631	1873	1651	1772	1722	1682	1742	1913		1772	1742	1571	1500	1661
130.333	1772	1833	1480	1792	1521	1682	1843	1581	1813	1581	1792	1863	1692	1641	1581	1692	1712	1792	1672	1661	1772	1682	1702	1722	1772		1762	1772	1672	1510	1702
130.667	1692	1752	1641	1712	1631	1752	1903	1621	1732	1571	1641	1953	1601	1631	1712	1752	1672	1772	1621	1752	1752	1631	1802	1641	1692		1732	1561	1591	1420	1782
131	1853	1813	1561	1762	1641	1672	1984	1531	1792	1591	1953	1893	1802	1611	1742	1762	1742	1762	1732	1611	1641	1661	1823	1782	1903		1742	1752	1823	1571	1772
131.333	1853	1833	1591	1923	1672	1893	1823	1510	1863	1601	1762	1964	1692	1672	1682	1702	1722	1923	1772	1641	1873	1722	1923	1792	1843		1782	1813	1702	1641	1702
131.667	1802	2004	1581	1792	1682	1661	1863	1581	1682	1581	1863	1984	1792	1641	1651	1641	1843	1903	1843	1631	1722	1742	1641	1722	1813		1722	1732	1692	1500	1722
132	1752	1853	1571	1772	1742	1833	1923	1601	1953	1621	1923	1883	1601	1661	1752	1591	1762	1933	1682	1601	1722	1651	1732	1661	1772		1883	1843	1672	1490	1651
132.333	1772	1913	1873	1742	1752	1843	2004	1722	1863	1541	1984	1953	1651	1682	1631	1933	1762	1813	1802	1843	1802	1661	1732	1823	1843		1833	1792	1712	1480	1752
132.667	1883	1853	1712	1853	1641	1893	1772	1682	1903	1631	1913	2034	1641	1722	1792	1672	1712	1752	1762	1621	1802	1742	1752	1742	1953		1782	1722	1601	1561	1772
133	1833	1722	1672	1651	1672	1752	1873	1611	1853	1591	1994	1913	1631	1611	1712	1782	1792	1732	1762	1682	1833	1621	1863	1732	1863		1873	1813	1651	1541	1702
133.333	1802	1943	1732	1802	1823	1873	1933	1551	1873	1702	2024	2094	1813	1561	1581	1611	1843	1802	1742	1752	1742	1742	1742	1742	1913		1813	1903	1651	1541	1762
133.667	1853	1853	1682	1782	1782	1833	1813	1621	1943	1601	2024	2004	1682	1571	1702	1722	1853	1742	1853	1772	1742	1813	1712	1813	1964		1853	1742	1611	1651	1712
134	1893	1893	1651	1772	1722	1813	1994	1702	1913	1732	1994	2044	1732	1591	1742	1782	1813	1722	1792	1702	1672	1702	1682	1772	1853		1833	1762	1762	1490	1722
134.333	1863	2004	1651	1782	1702	1682	1742	1692	1843	1651	1903	2034	1782	1531	1641	1682	1782	1943	1853	1813	1732	1682	1782	1672	1953		1641	1853	1782	1510	1772
134.667	1813	1903	1692	1873	1732	1792	1863	1651	1833	1641	1943	2396	1732	1692	1631	1712	1742	1903	1601	1611	1732	1682	1943	1752	1813		1772	1692	1672	1531	1843
135	1913	1903	1722	1702	1722	1762	1893	1712	2024	1712	2346	2044	1651	1692	1712	1702	1873	1782	1772	1641	1913	1722	1853	1782	1863		1692	1732	1742	1521	1611
135.333	1843	1802	1521	1732	1601	1853	1893	2074	1792	1561	1863	1984	1641	1672	1631	1772	1752	1802	1863	1722	1782	1712	1843	1863	1732		1953	1702	1802	1661	1792
135.667	2014	1923	1611	1853	1682	1772	1903	1611	1873	1702	1873	2074	1712	1591	1702	1792	1853	1782	1762	1732	1792	1692	1792	1833	1732		1762	1732	1692	1490	1863
136	1923	1813	1661	1742	1672	1692	1923	1591	1943	1510	1893	1994	1651	1591	1651	1813	1661	1802	1843	1782	1813	1692	1863	1702	1843		1772	1772	1672	1510	1893
136.333	1873	1873	1591	1843	1561	1873	1953	1581	1702	1742	1863	2024	1742	1651	1601	1823	1782	1802	1702	1621	1722	1611	1823	1782	1863		1772	1722	1601	1541	1823
136.667	1813	1752	1611	1752	1692	1692	1883	1712	1913	1571	1923	2004	1631	1621	1752	1913	1813	1813	1752	1813	1823	1873	1843	1863	1712		1833	1752	1712	1521	1752
137	1823	1873	1611	1863	1601	1772	1802	1712	1712	1672	1853	1943	1802	1833	1661	1752	1823	1792	1752	1772	1843	1772	1722	1752	1953		1682	1863	1702	1611	1682
137.333	1813	1893	1631	1762	1843	1802	1923	1682	1903	1601	1823	1893	1692	1692	1792	1843	1762	1853	1742	1651	1762	1722	1762	1813	1843		1611	1762	1712	1631	1722
137.667	1752	1923	1581	1843	1682	1772	1964	1672	1893	1621	1933	2064	1521	1551	1611	1792	1802	1883	1893	1772	1762	1772	1792	1732	1712		1802	1682	1661	1430	1802
138	1984	1772	1631	1742	1551	1692	1853	1531	1843	1611	1933	1953	1702	1601	1692	1661	1762	1772	1752	1752	1833	1752	1883	1792	1863		1762	1843	1792	1510	1792
138.333	1933	1883	1702	1732	1581	1903	1782	1621	2004	1702	1953	1994	1571	1601	1692	1792	1641	1752	1752	1682	1692	1621	1692	1732	1863		1772	1702	1813	1541	1792
138.667	1772	1893	1621	1661	1561	1722	1823	1641	1863	1591	1923	1994	1682	1752	1571	1732	1863	1863	1782	1722	1843	1651	1843	1833	1782		1742	1722	1651	1500	1752
139	1873	1823	1521	1782	1752	1782	1813	1782	1762	1601	1883	1923	1541	1521	1692	1611	1772	1802	1923	1772	1913	1823	1843	1732	1903		1833	1641	1752	1692	1702
139.333	1742	1752	1591	1712	1631	1672	1813	1762	1813	1591	1742	2024	1551	1661	1651	1581	1702	1682	1682	1641	1843	1722	1873	1722	1823		1742	1661	1631	1521	1722
139.667	1772	1873	1621	1833	1631	1591	1823	1531	1903	1581	1873	1943	1631	1510	1682	1853	1873	1843	1752	1651	1853	1712	1722	1752	1782		1561	1732	1752	1510	1813
140	1651	1943	1561	1661	1762	1772	2004	1601	1933	1692	1772	2024	1651	1531	1732	1732	1762	1772	1813	1651	1682	1702	1802	1843	1833		1802	1883	1692	1541	1742
140.333	1833	1964	1702	1772	1732	1631	1823	1581	1782	1621	1873	1943	1702	1581	1641	1752	1752	1782	1813	1863	1621	1631	1792	1702	1893		1631	1742	1661	1490	1742
140.667	1893	1863	1450	1732	1682	1772	1833	1722	1823	1541	1913	1953	1672	1611	1672	1762	1722	2004	1762	1863	1853	1672	1792	1833	1994		1762	1762	1682	1480	1661
141	1843	1883	1581	1762	1601	1742	1893	1490	1792	1571	1893	1883	1682	1682	1551	1732	1823	1782	1752	1752	1833	1712	1722	1732	1883		1631	1792	1672	1369	1601
141.333	1903	1833	1631	1722	1651	1823	1802	1541	1863	1611	1833	1893	1722	1561	1772	1782	1873	1913	1762	1702	1712	1943	1813	1792	1883		1732	1823	1782	1581	1732
141.667	1913	1893	1631	1762	1631	1772	1873	1661	1893	1591	1883	1853	1702	1661	1712	1863	1823	1843	1712	1853	1732	1651	1621	1722	1883		1772	1752	1651	1420	1510
142	1792	1883	1621	1843	1591	1823	1883	1651	1923	1661	1772	1913	1621	1621	1601	1692	1823	1923	1752	1752	1843	1702	1631	1702	1974		1702	1893	1722	1551	1682
142.333	1772	1943	1682	1722	1712	1802	1833	1591	1843	1631	1923	1943	1661	1490	1631	1661	1813	1772	1913	1601	1702	1661	1833	1792	1953		1722	1762	1591	1541	1611
142.667	1953	1772	1692	1843	1722	1682	1893	1641	1802	1561	1893	1984	1621	1621	1561	1732	1782	1792	1672	1752	1813	1651	1692	1823	1782		1682	1843	1601	1551	1762
143	1943	1802	1692	1762	1601	1853	1843	1621	1833	1581	1782	2004	1712	1480	1611	1611	1742	1802	1802	1641	1732	1752	1702	1782	1772		1752	1672	1561	1400	1682
143.333	1853	1772	1621	1752	1672	1772	1772	1611	1732	1521	1752	1833	1651	1611	1631	1732	1883	1903	1742	1651	1702	1692	1813	1762	1883		1621	1682	1722	1571	1551
143.667	1772	1792	1581	1843	1601	1661	1833	1510	1853	1521	1853	1843	1722	1621	1521	1863	1772	1712	1732	1722	1692	1591	1782	1782	1903		1802	1742	1460	1480	1651
144	1823	1843	1601	1792	1631	1682	1782	1641	1782	1661	1732	1984	1661	1661	1500	1672	1762	1792	1913	1551	1742	1601	1722	1651	1953		1661	1742	1641	1470	1752
I
	Con								Pgc1α KD
Peak 1	1.7	1.5	1.9	2.3	2.1	1.9	1.5	2.1	1	1.2	1.2	1	1	1
Peak 2	2	2.2	2.4	2.2	2	1.6	1.6	1.1	1.375	1.675	1.675	1.475	1.375	1.175
