# Supplementary material for: An adipokine feedback regulating diurnal food intake rhythms in mice
Source: eLife. 2020 Jul 9;9:e55388. doi: 10.7554/eLife.55388 (PMC7375813; doi:10.7554/eLife.55388)
Supplement: Figure 8—source data 1. [file elife-55388-fig8-data1.xlsx]

## Sheet: Sheet1
B
ZT	WT / AR rhythmic											WT / AR constant											WT / Veh rhythmic
0-6	12.6482	14.4804	11.6788	13.6213	19.5122	13.5294	16.2722	19.7115	8.05085	10.6509		19.2926	18.7621	19.0698	20.3095	16.6287	20.7547	18.278	11.5942	25.5814	23.9182	19.4972	18.254	21.129	19.0187	17.5	24.1158	26.7046	19.0535	17.2815
6-12	25.6917	14.9915	19.3431	17.2757	19.9187	19.2157	18.4024	16.8269	22.4576	18.3432		24.1158	28.6267	13.6434	28.6267	28.246	21.8696	21.1826	31.1594	20	24.044	18.4357	21.0317	17.9032	21.028	15	20.5788	13.0682	24.2798	24.1262
12-18	35.1779	31.0051	30.292	35.2159	26.8293	37.6471	40.8284	35.5769	39.8305	39.0532		27.9743	26.6925	31.6279	28.2399	29.1572	27.7873	32.7593	32.7536	26.9767	27.2327	32.4581	35.3175	33.0645	29.5794	30	36.0129	31.25	29.1564	31.068
18-0	26.4822	39.523	38.6861	33.887	33.7398	30.5882	26.568	25	27.5424	34.9112		28.6174	25.9188	35.6589	22.824	25.9681	29.5883	27.7801	24.4928	27.4419	24.805	29.6089	25.3968	27.9032	30.3738	37.5	19.2926	28.9773	27.5103	27.5243
C
WT / Veh rhythmic	WT / AR constant	WT / AR rhythmic
39.29	43.41	38.34
39.03	47.39	29.47
40.05	32.71	31.02
32.5	48.94	30.9
44.69	44.87	39.43
39.77	42.62	32.43
43.33	39.46	33.97
41.41	42.75	37.62
	45.58	31.17
	47.96	28.16
	37.93
D
WT / Veh rhythmic	WT / AR constant	WT / AR rhythmic
2.52	5.29	3.7
3.1	2.92	2.52
2.14	1.97	3.42
3.52	3.01	3.56
3.11	2.46	3.01
3.9	3.99	2.67
2.93	4.06	2.99
2.59	2.45	4.6
	4.09	2.44
	3.37	3.47
	3.35	4.12
E
Time on HFD (weeks)	WT / AR constant										WT / AR rhythmic											WT / Veh rhythmic
0	0	0	0	0	0	0	0	0	0	0	0	0	0	0	0	0	0	0	0	0	0	0	0	0	0	0	0	0	0
1	4.4	2.17	2.47	4.59	6.97	3.01	3.08	4.68	4.23	3.61	3.1	1.84	1.7	3.92	4.51	2.21	2.49	3.38	2.95	2.84	4.51	1.52	4.32	2.59	4.52	5.26	2.81	3.81	4.12
2	6.39	2.62	3.54	6.82	6.85	4.18	4.33	5.74	5.28	4.84	5.77	2.3	2.27	6.31	7.46	3.45	3.63	5.35	4.78	4.35	7.46	2.46	6.8	4	5.89	9.22	4.42	5.56	6.37
3	10.14	6.11	6.18	9.92	9.6	7.48	7.4	8.57	8.33	8.02	8.07	5.34	4.97	8.72	10.66	6.13	6.34	8.12	7.51	7.08	10.66	4.4	9.96	5.5	9.96	13.72	6.62	8.47	9.73
4	11.47	7.02	8.34	9.19	9.22	8.94	8.18	8.92	9.3	8.52	8.14	5.64	6.49	7.9	9.52	6.76	6.68	7.97	7.71	7.07	9.52	5.6	10.31	5.91	10.17	15.64	7.27	8.8	10.57
5	13.34	7.74	8.73	10.02	10.1	9.94	8.83	9.62	10.25	9.33	9.46	7.79	7.74	9.72	11.38	8.33	8.42	9.61	9.25	8.86	11.38	6.72	11.03	7.4	11.36	17.74	8.38	9.93	12.17
6	15.38	9.28	9.62	14.41	11.683	11.43	11.1	11.9	11.95	11.76	12.43	10.49	8.93	12.27	14.98	10.62	10.56	12.06	11.73	11.36	14.98	9.68	14.05	9.15	13.36	18.02	10.96	12.19	13.51
7	15.88	8.5	9.66	14.89	13.2	11.35	11.02	12.58	12.44	11.83	11.62	8.67	7.2	9.42	13.38	9.16	8.43	10	10.16	9.31	13.38	9.64	14.12	10.59	13.21	18.31	11.45	12.64	14.04
8	16.34	9.39	9.08	12.59	13.56	11.6	10.35	11.74	12.33	11.33	8.32	8.37	4.77	6.97	10.87	7.15	6.7	7.54	7.67	7.51	10.87	8.94	14.21	10.37	14.53	17.71	11.17	13.04	14.2
9	16.08	9.33	9.48	12.12	13.63	11.63	10.31	11.74	12.38	11.21	8.18	8.42	5.47	6.17	9.84	7.36	6.69	7.16	7.55	7.28	9.84	11.5	14.93	10.88	14.36	16.8	12.44	13.39	14.01
F
WT / AR constant	WT / AR rhythmic	WT / Veh rhythmic
2.92	0.94	0.88
1.12	1.23	2.61
1.72	0.58	1.18
1.62	0.48	3.1
2.49	1.32	1.37
2.3	1.6	1.7
1.65	1.37	2.1
1.5	1.72	3.05
1.8	1.37
2.1	1.67
	1.5
G
	BKO / Veh rhythmic						BKO / AR rhythmic						BKO / AR constant
0-6	26.17	36.52	36.66	23.06	26.61	20.97	15.15	20.54	19.59	35	29.2	26.52	27.46	32.89	18.27	19.46	25.14	18.81
6-12	27.23	34.19	16.11	24.26	21.39	27.32	35.52	23.44	17.13	25.83	18.37	24.63	12.63	21.53	31.33	25.93	27.04	31.7
12-18	19.93	16.85	20.82	34.09	31.98	23.7	33.79	27.94	40.77	26.65	26.9	30.61	29.36	20.89	24.69	22.25	28.74	33.41
18-0	26.66	12.44	26.41	18.58	20.02	28.01	15.55	28.08	22.51	12.52	25.52	18.24	30.56	24.69	25.72	32.36	19.08	16.08
H
Time on HFD (weeks)	WT / AR constant						WT / AR rhythmic						WT / Veh rhythmic
0	0	0	0	0	0	0	0	0	0	0	0	0	0	0	0	0	0	0
1	5.3	2.6	3	5.5	5.2	3.6	3.7	5.6	5.1	4.3	1.8	5.2	3.1	5.4	6.3	3.4	4.6	4.9
2	7.7	3.1	4.2	8.2	8.2	5	5.2	6.9	6.3	5.8	3	8.2	4.8	7.1	9.2	5.3	6.7	7.6
3	12.2	7.3	7.4	11.9	11.5	9	8.9	10.3	10	9.6	5.3	12	6.6	12	11.1	7.9	10.2	11.7
4	13.8	8.4	10	11	11.1	10.7	9.8	10.7	11.2	10.2	6.7	12.4	7.1	12.2	12.5	8.7	10.6	12.7
5	16	9.3	10.5	12	12.1	11.9	10.6	11.5	12.3	11.2	8.1	13.2	8.9	13.6	13.2	10.1	11.9	14.6
6	18.5	10.2	10.9	14.5	14	13.7	12.4	14.1	14.3	13.6	10.7	16.9	11	16	13.8	13.2	14.6	16.2
7	19.1	11.1	11.5	15.1	15.8	13.6	12.4	14.1	14.9	13.5	11.6	16.9	12.7	15.9	15.3	13.7	15.2	16.8
8	19.6	11.3	11.6	17.3	16.3	13.9	13.2	14.3	14.8	14.1	11.6	17.1	12.4	17.4	16.5	13.4	15.6	17
9	19.3	11.2	11.4	17.9	16.4	14	13.3	15.1	14.9	14.2	13.8	17.9	13.1	17.2	18.8	14.9	16.1	16.8
I
BKO / AR constant	BKO / AR rhythmic	BKO / Veh rhythmic
4.63	3.37	3.43
2.57	3.75	4.37
2.97	3.81	3.34
3.19	3.68	5.25
3.41	4.54	2.24
3.79	3.73	2.3
