# Supplementary material for: An adipokine feedback regulating diurnal food intake rhythms in mice
Source: eLife journal article supplement (doi:10.7554/elife.55388), 2020-07-09

**A**

WT

KO

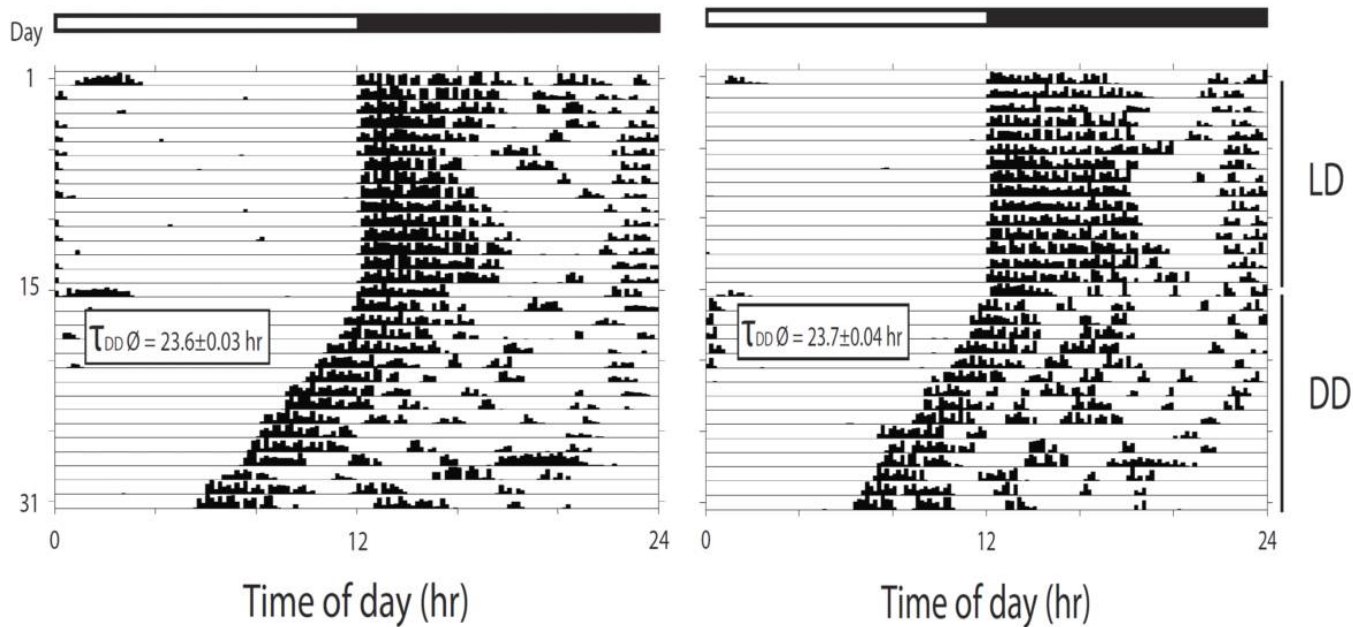**B**

LD WT MT total activity

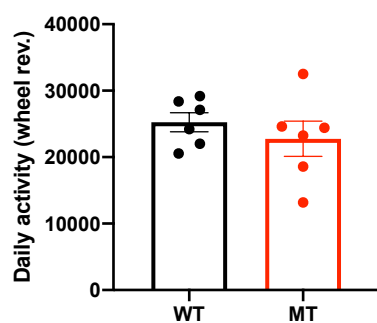**C**

LD WT MT light phase activity

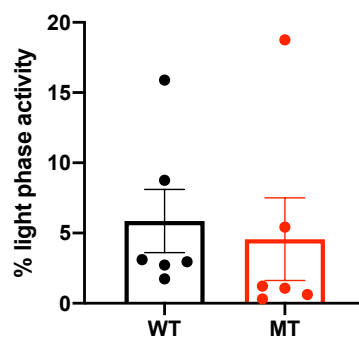**D**

LD WT MT total food intake

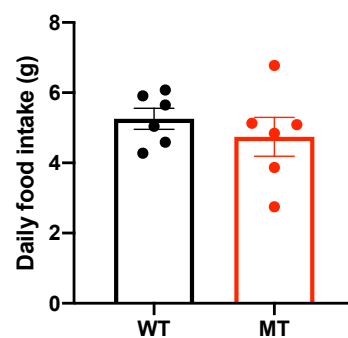**E**

DD WT MT total activity

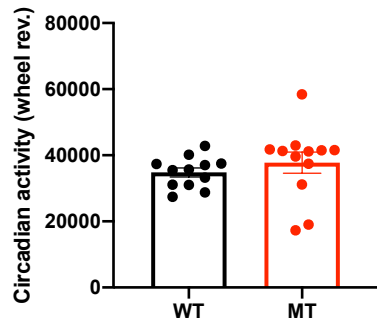**F**

DD WT MT period

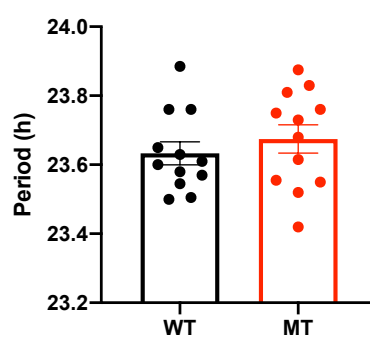**G**

DD WT MT total food intake

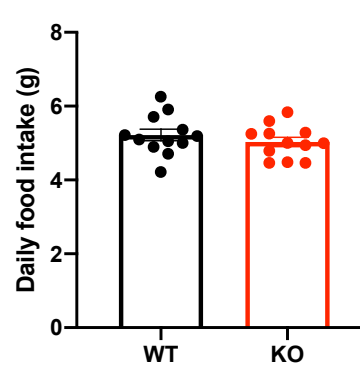

Supplement: supp [file elife-55388-supp-v1.zip]
