# Supplementary material for: An adipokine feedback regulating diurnal food intake rhythms in mice
Source: eLife journal article supplement (doi:10.7554/elife.55388), 2020-07-09

**A****DD WT vs Adipoq SCN Bmal1**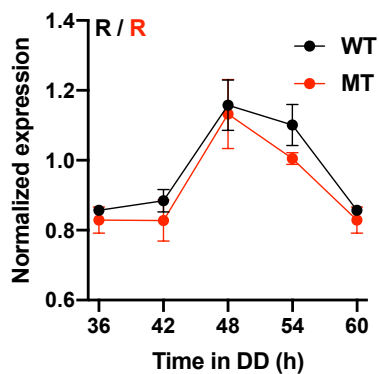**B****DD WT vs Adipoq SCN Per2**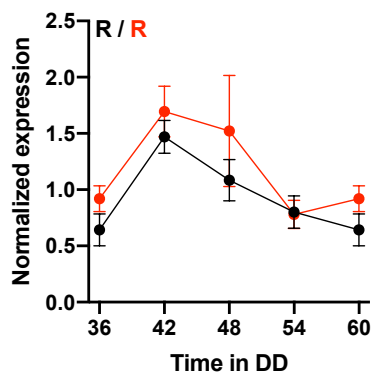**C****DD WT vs Adipoq SCN Dbp**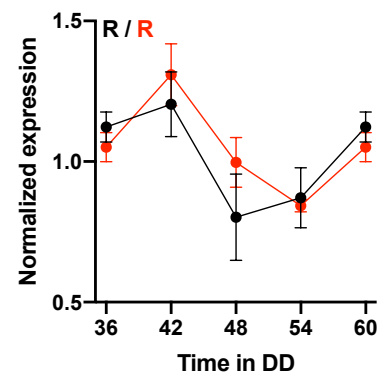**D****DD WT vs Adipoq Liver Bmal1**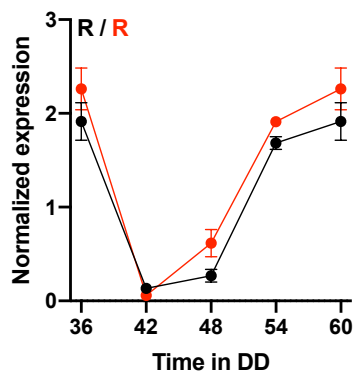**E****DD WT vs Adipoq Liver Per2**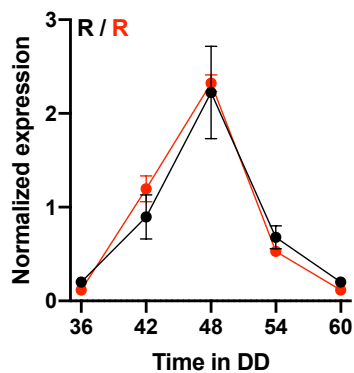**F****DD WT vs Adipoq Liver Dbp**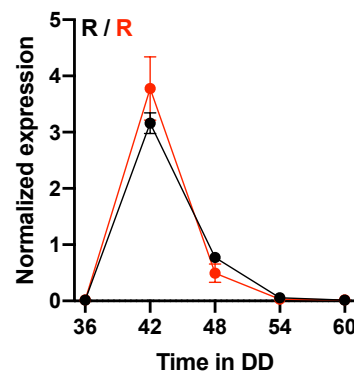**G****DD WT vs Adipoq Muscle Bmal1**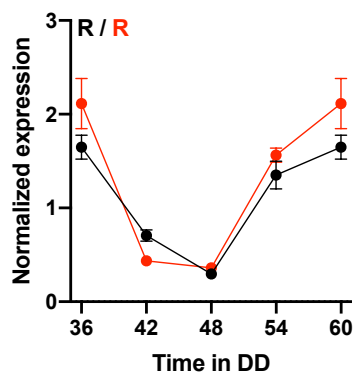**H****DD WT vs Adipoq Muscle Per2**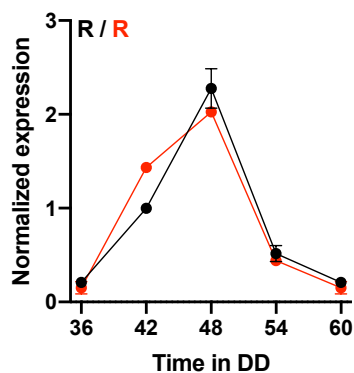**I****DD WT vs Adipoq Muscle Dbp**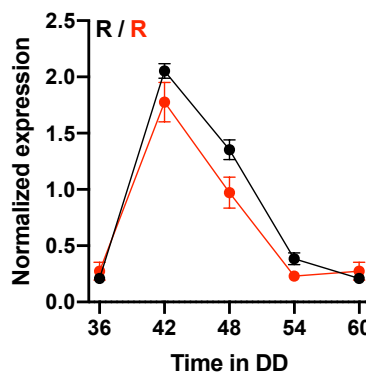

Supplement: supp [file elife-55388-supp-v1.zip]
