# Supplementary figures and images for: An adipokine feedback regulating diurnal food intake rhythms in mice
Source: eLife journal article supplement (doi:10.7554/elife.55388), 2020-07-09

**A**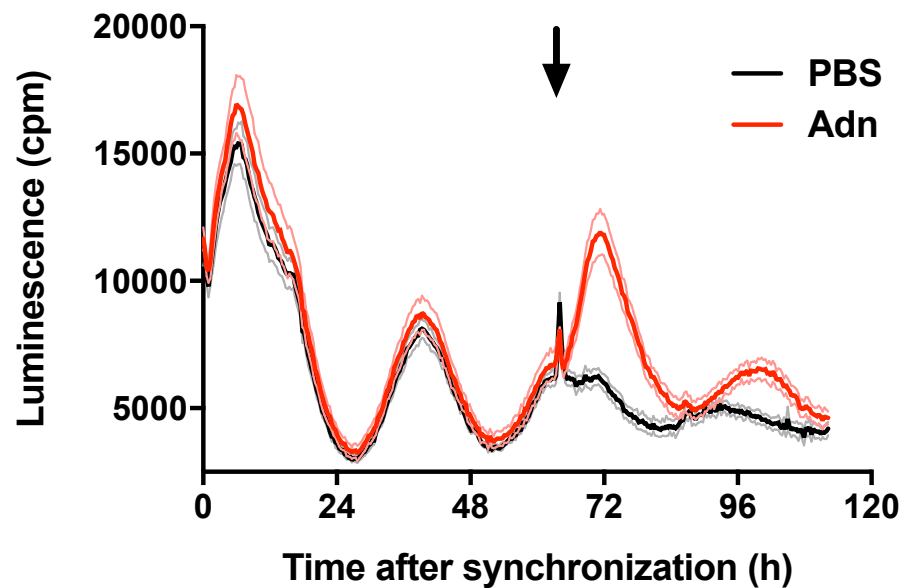**B**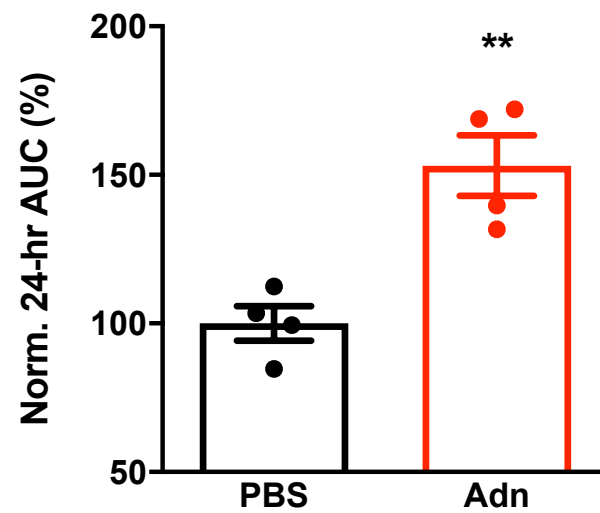**C**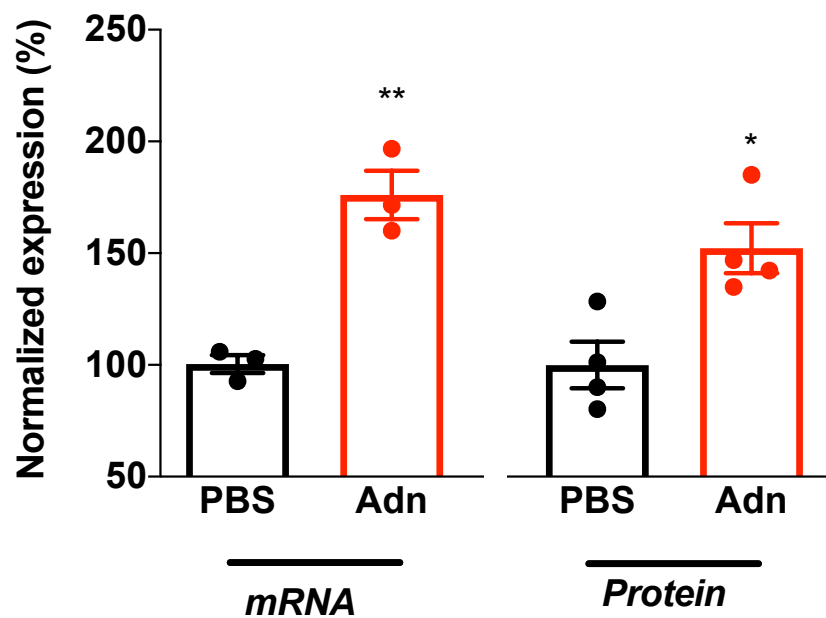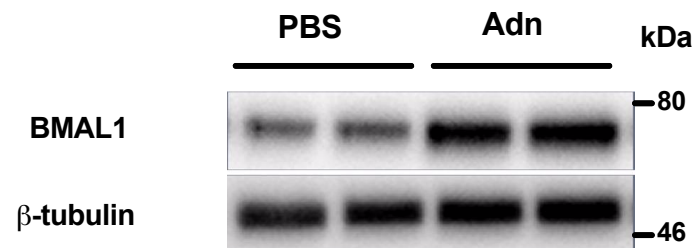

Supplement: supp [file elife-55388-supp-v1.zip]

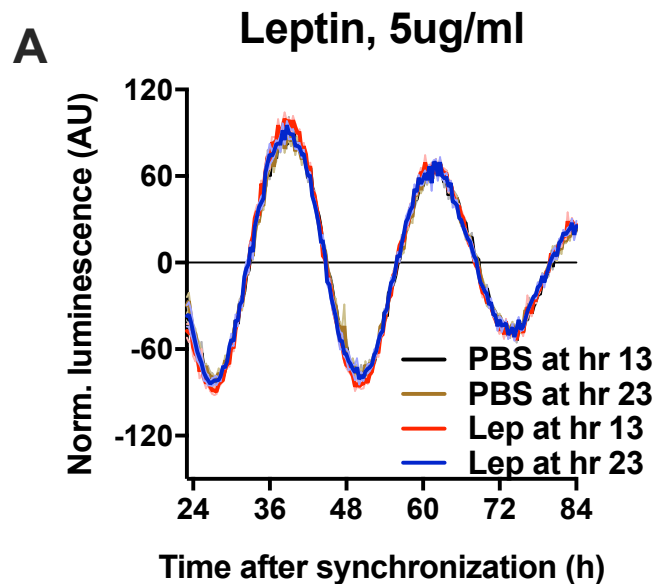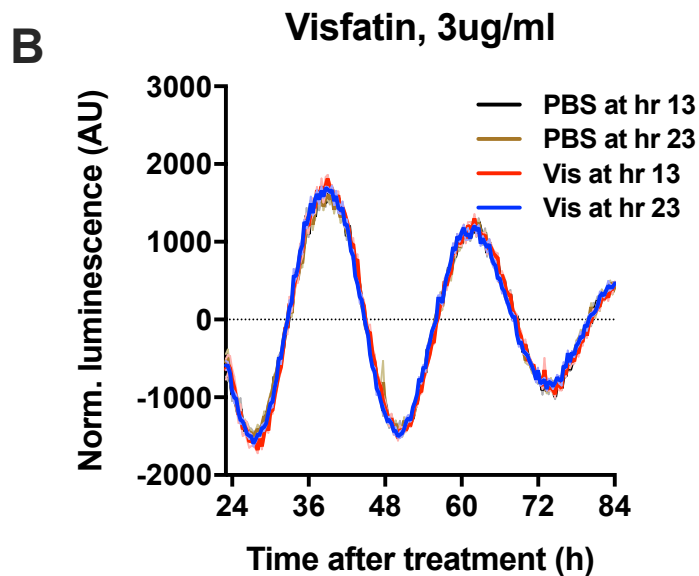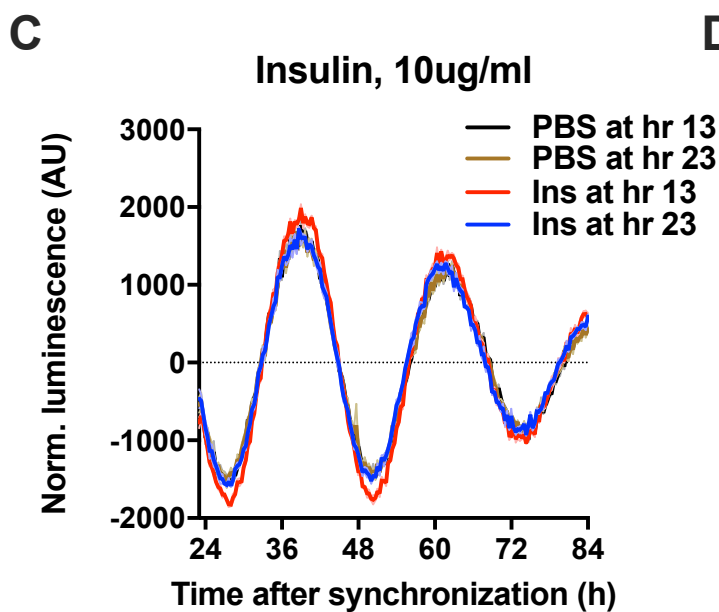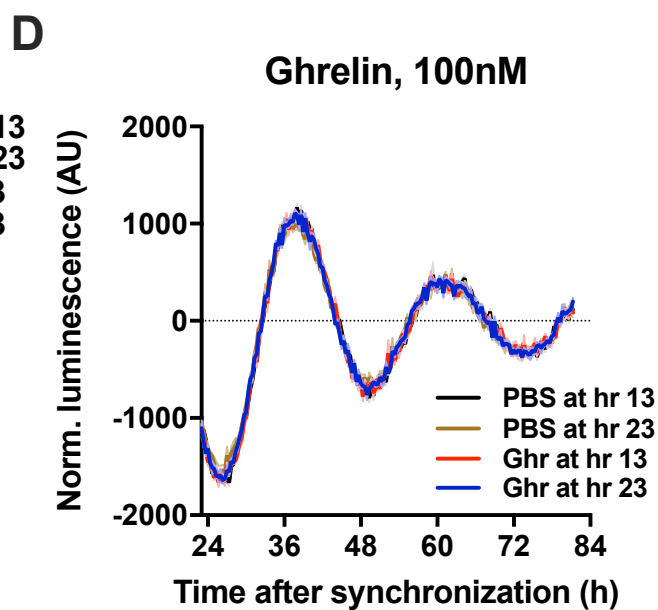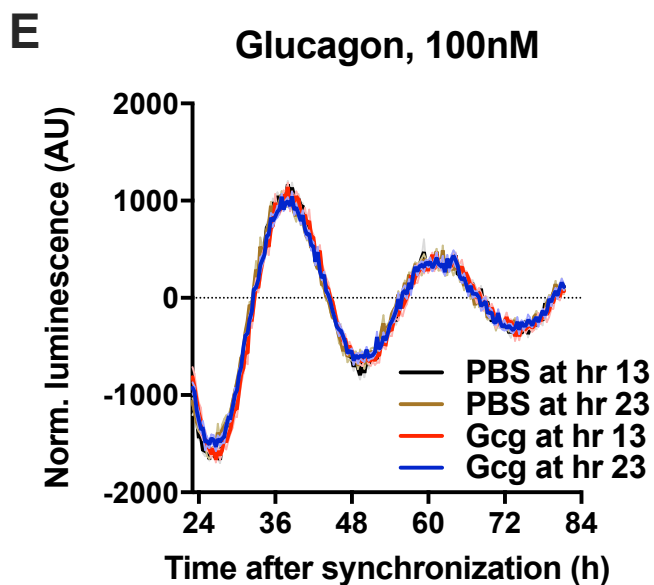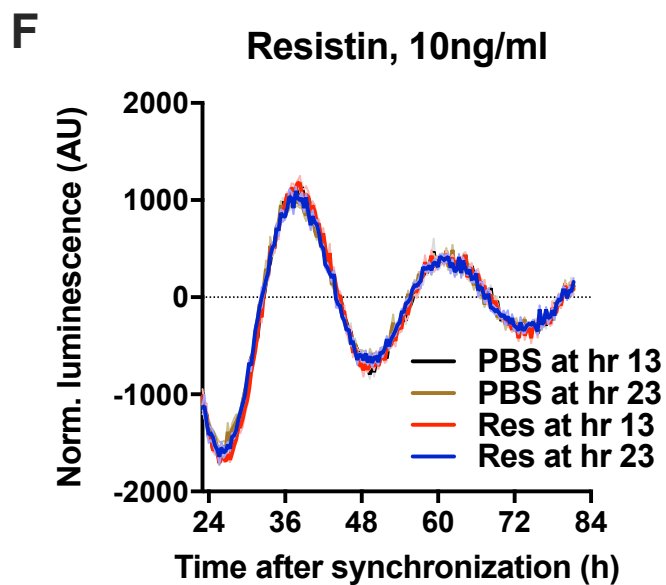

Supplement: supp [file elife-55388-supp-v1.zip]

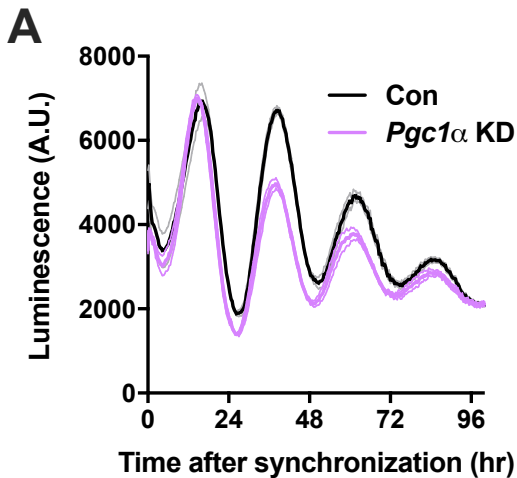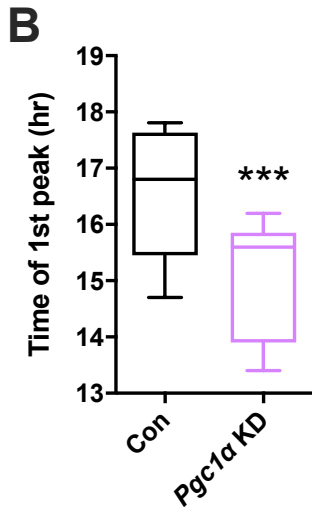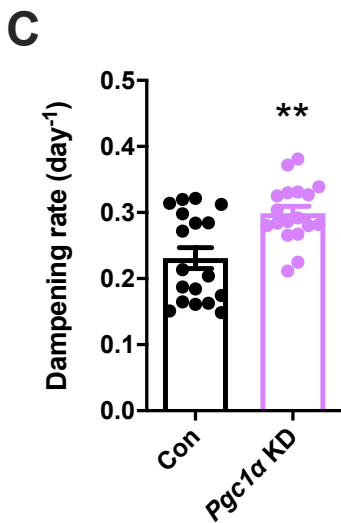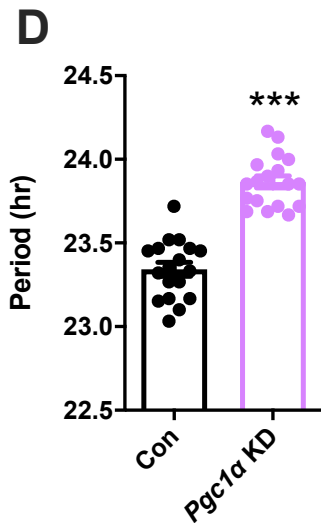

Supplement: supp [file elife-55388-supp-v1.zip]

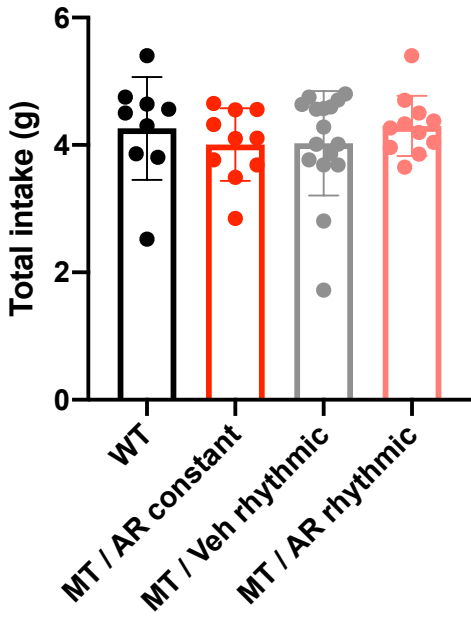

Supplement: supp [file elife-55388-supp-v1.zip]

**A**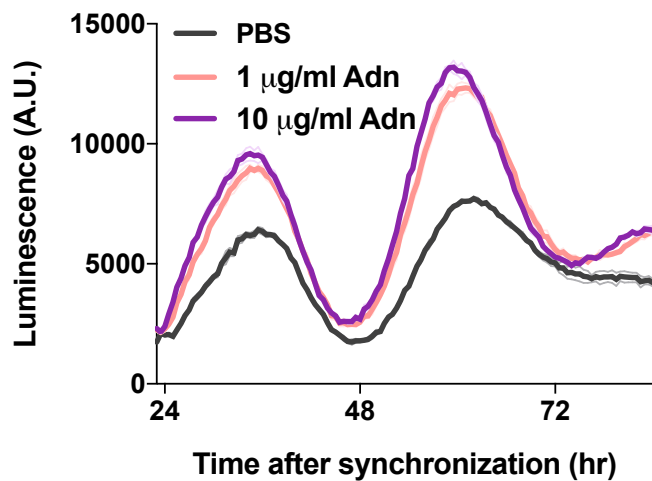**B**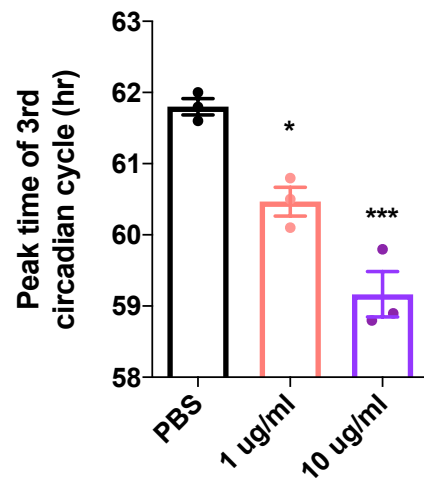**C**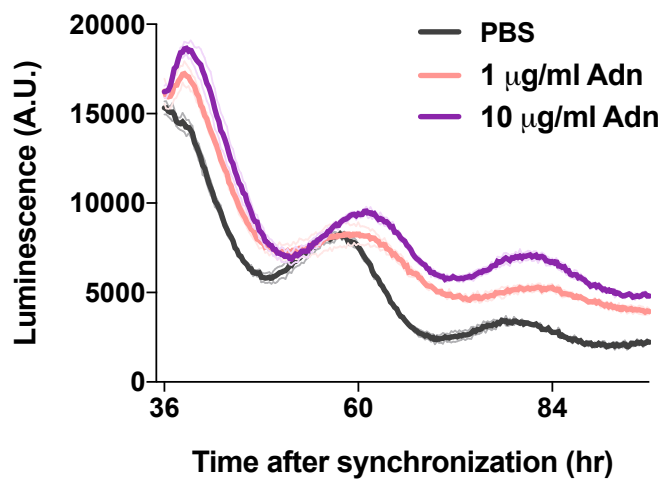**D**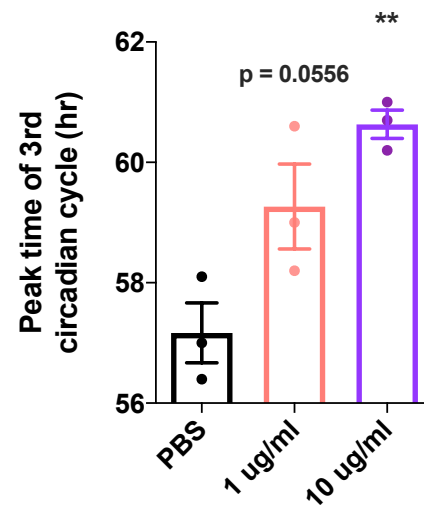

Supplement: supp [file elife-55388-supp-v1.zip]

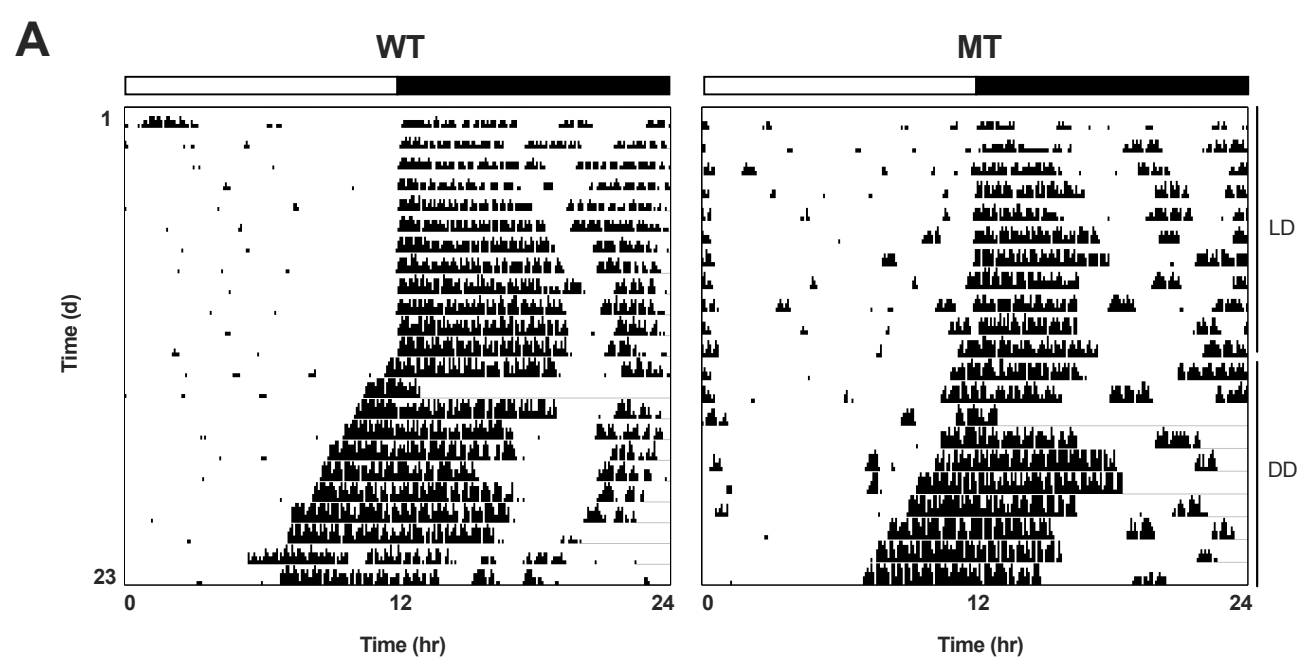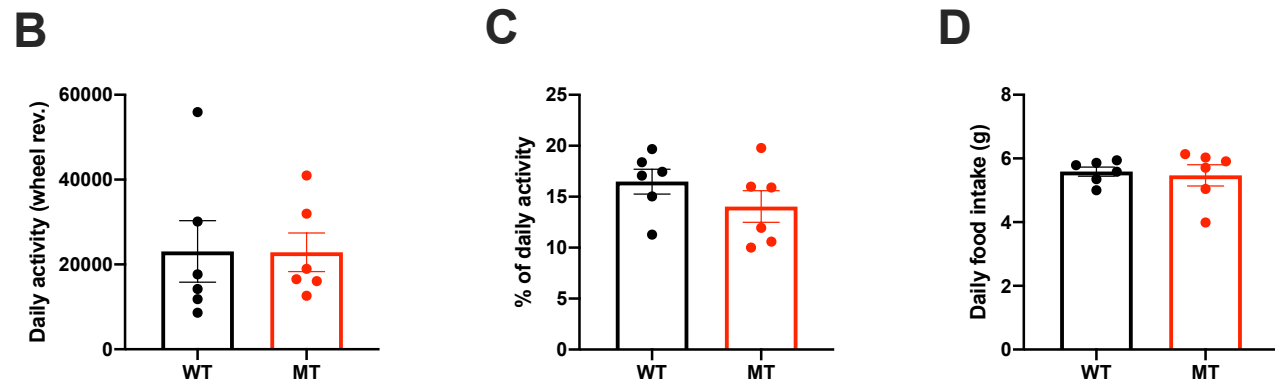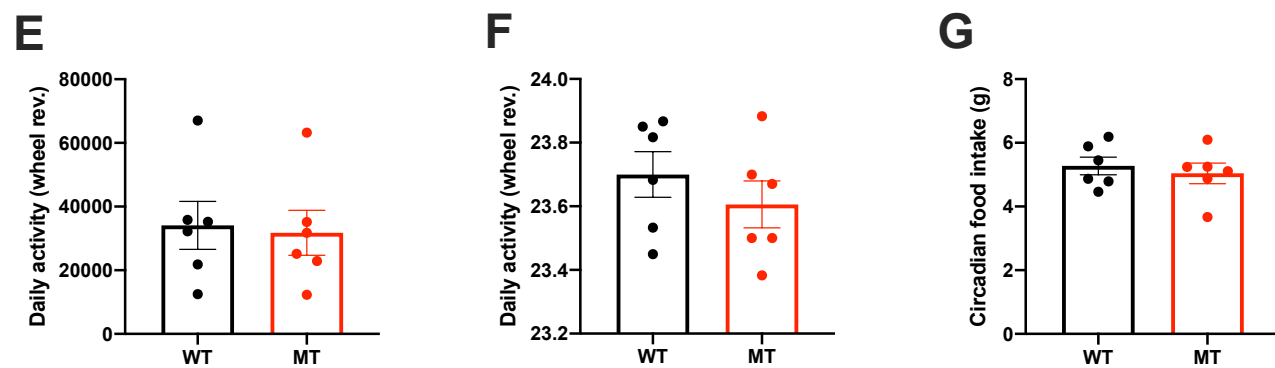

Supplement: supp [file elife-55388-supp-v1.zip]

**A****Dexamethasone, 100 nM**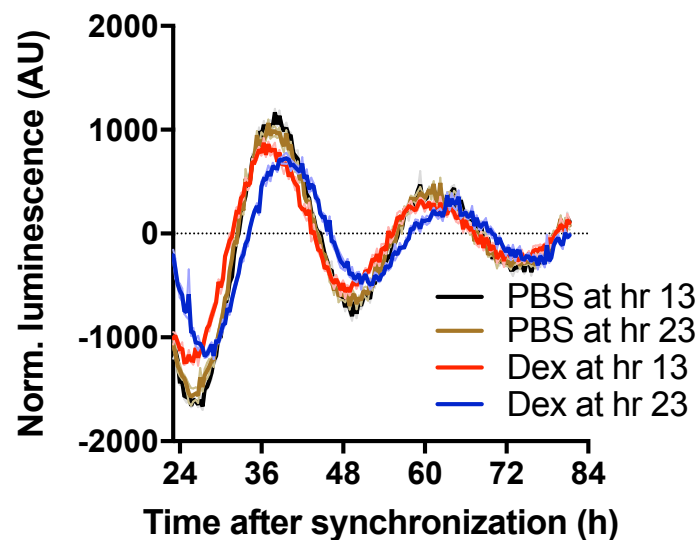**B****Forskolin, 10  $\mu$ M**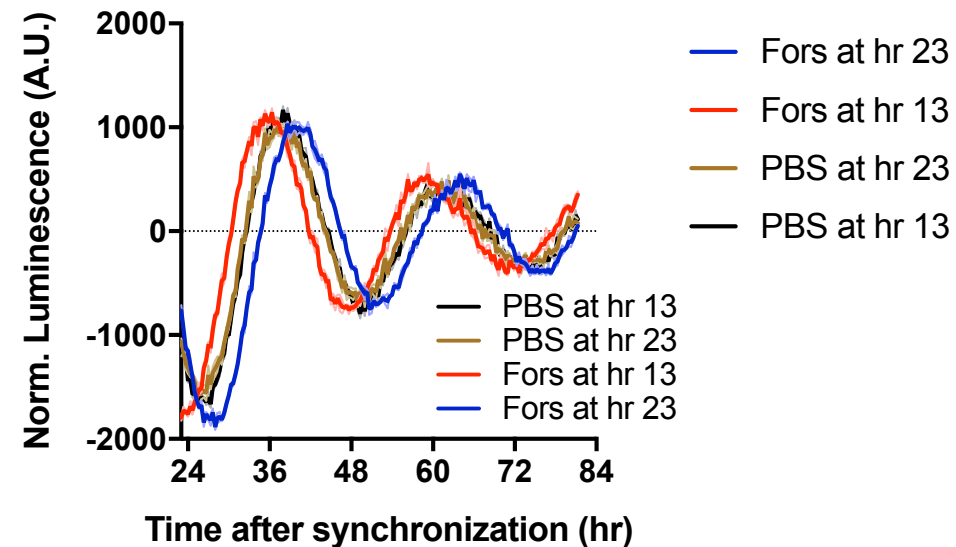**DEX PRC**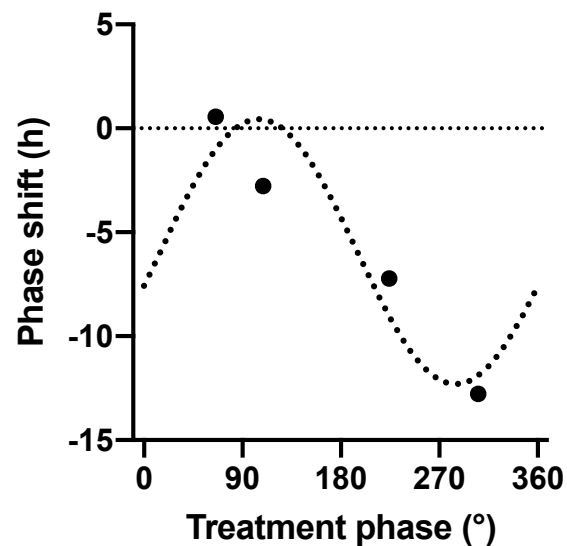**Fors PRC**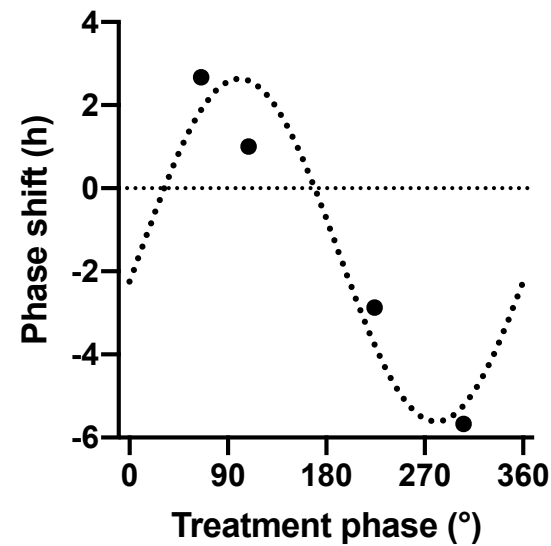

Supplement: supp [file elife-55388-supp-v1.zip]

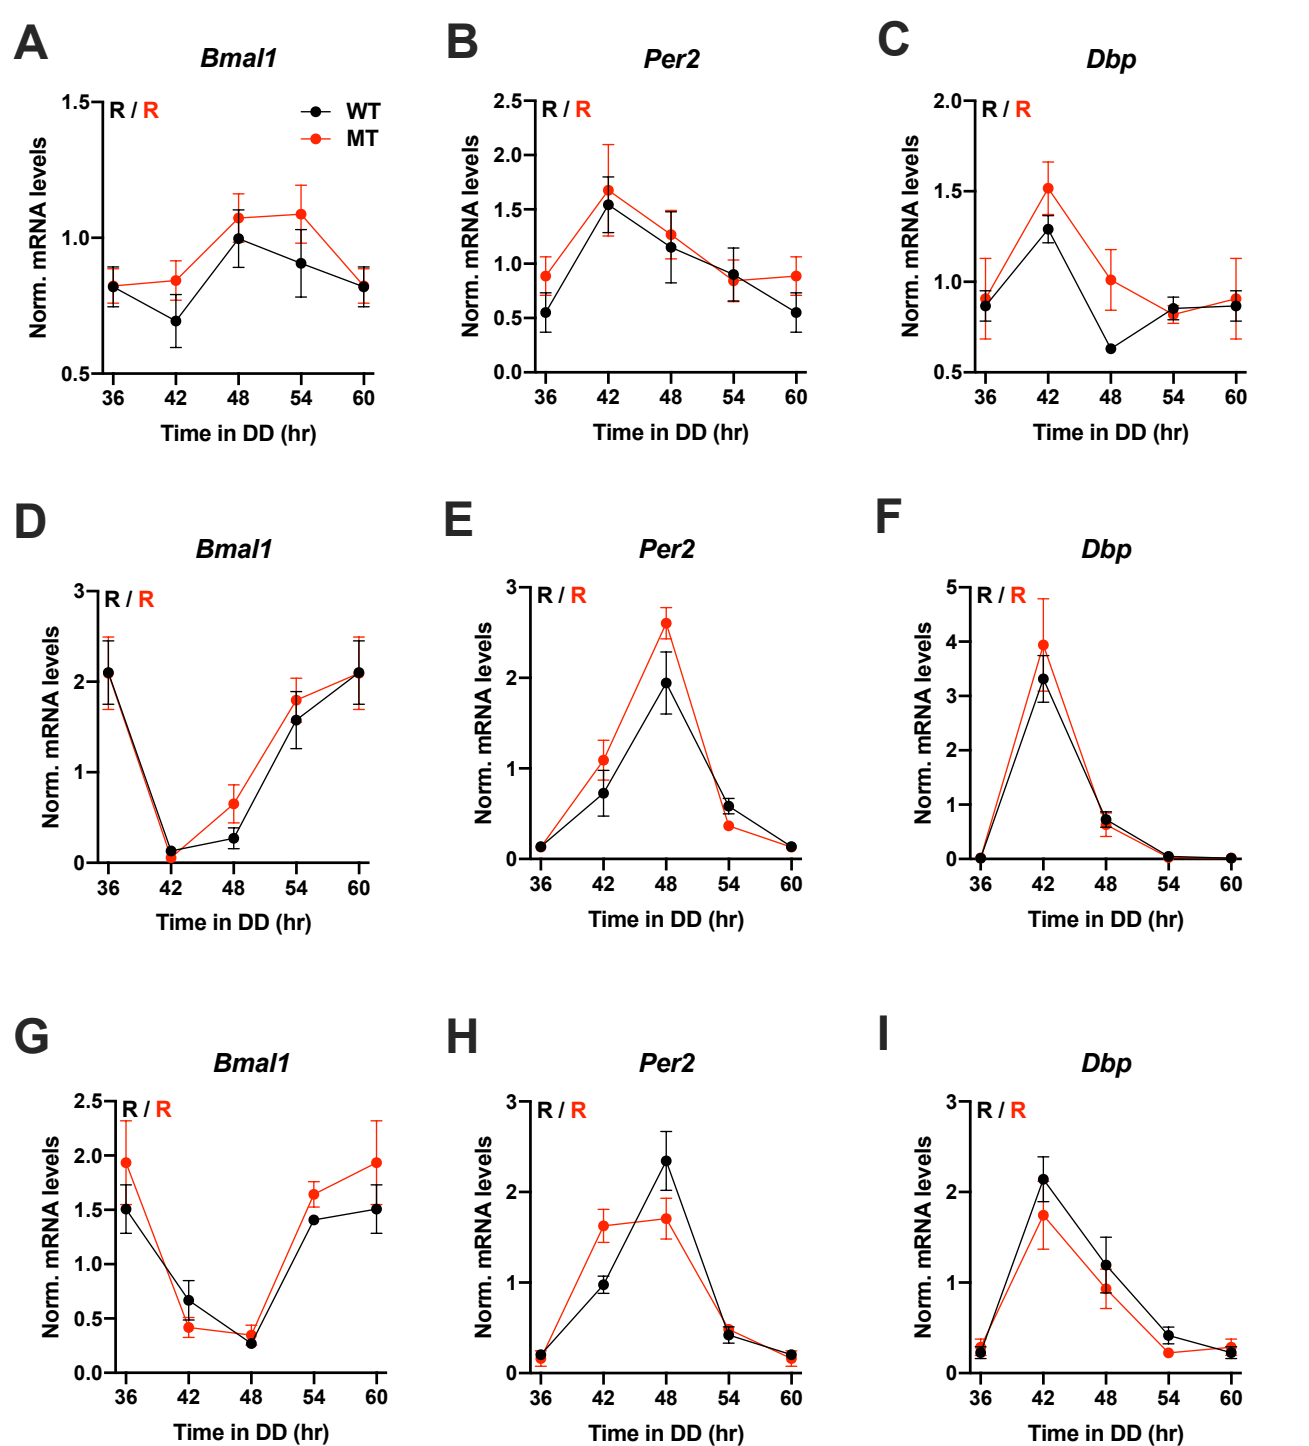

Supplement: supp [file elife-55388-supp-v1.zip]
